# Supplementary material for: Engineering of CHO cells for the production of vertebrate recombinant sialyltransferases
Source: PeerJ journal article supplement (doi:10.7717/peerj.5788), 2019-02-11

**Figure 3: Statistics**

**Univariate Analysis of Variance**

**Legend to Figure 3 Raw Data Set 2**

| Label for Statistics | Corresponding in Manuscript           |
|----------------------|---------------------------------------|
| A5                   | hST6 A5                               |
| B1                   | hST6 B1                               |
| G1                   | hST6                                  |
| Dre                  | zST6                                  |
| Gac                  | sST6                                  |
| Tru                  | fST6                                  |
| Gga                  | cST6                                  |
| Rno                  | rST6                                  |
| Ctrl                 | mST6 (commercial mouse enzyme)        |
| ST3A2                | hST3 A2                               |
| ST3A1                | hST3 A2                               |
| ST3H6                | zST3                                  |
| ST2                  | hST6Gal2                              |
| Neg                  | Neg (IMAC-purified PSA <sup>1</sup> ) |

<sup>1</sup>PSA: Prostate Specific Antigen (no sialyltransferase activity)

**Notes**

|                        |                           |                                                                   |
|------------------------|---------------------------|-------------------------------------------------------------------|
| Output Created         |                           | 12-JUL-2018 10:38:56                                              |
| Comments               |                           |                                                                   |
| Input                  | Data                      | \\gweng.gmadtree.gmit.ie\STAFF\Beno<br>it.Houeix\Documents\ST.sav |
|                        | Active Dataset            | DataSet1                                                          |
|                        | Filter                    | <none>                                                            |
|                        | Weight                    | <none>                                                            |
|                        | Split File                | <none>                                                            |
|                        | N of Rows in Working Data | 48                                                                |
|                        | File                      |                                                                   |
| Missing Value Handling | Definition of Missing     | User-defined missing values are<br>treated as missing.            |

|            |                |                                                                                                                                                                                                                                           |
|------------|----------------|-------------------------------------------------------------------------------------------------------------------------------------------------------------------------------------------------------------------------------------------|
| Cases Used |                | Statistics are based on all cases with valid data for all variables in the model.                                                                                                                                                         |
| Syntax     |                | UNIANOVA Activity BY Sample<br>/METHOD=SSTYPE(3)<br>/INTERCEPT=INCLUDE<br>/POSTHOC=Sample(BONFERRONI)<br>/PLOT=PROFILE(Sample)<br>/EMMEANS=TABLES(Sample)<br>/PRINT=HOMOGENEITY<br>DESCRIPTIVE<br>/CRITERIA=ALPHA(.05)<br>/DESIGN=Sample. |
| Resources  | Processor Time | 00:00:00.92                                                                                                                                                                                                                               |
|            | Elapsed Time   | 00:00:00.62                                                                                                                                                                                                                               |

#### Between-Subjects Factors

|        | Value Label | N |
|--------|-------------|---|
| Sample | A5          | 3 |
|        | B1          | 3 |
|        | Ctrl        | 3 |
|        | Dre         | 3 |
|        | G1          | 3 |
|        | Gac         | 3 |
|        | Gga         | 3 |
|        | Neg         | 3 |
|        | Rno         | 3 |
|        | ST2         | 3 |
|        | ST3A1       | 3 |
|        | ST3A2       | 3 |
|        | ST3H6       | 3 |
|        | Tru         | 3 |

#### Descriptive Statistics

**Note: These means are pmol/well, NOT pmol/min/ $\mu$ g protein as presented in Figure 3.**

Dependent Variable: Activity

| Sample | Mean      | Std. Deviation | N |
|--------|-----------|----------------|---|
| A5     | 2197.3667 | 312.12468      | 3 |

|       |           |            |    |
|-------|-----------|------------|----|
| B1    | 2440.0533 | 584.34650  | 3  |
| Ctrl  | 2451.6167 | 455.31970  | 3  |
| Dre   | 2660.1367 | 397.39347  | 3  |
| G1    | 2620.6967 | 345.92251  | 3  |
| Gac   | 3065.8800 | 432.52984  | 3  |
| Gga   | 2011.2967 | 280.50808  | 3  |
| Neg   | 199.0700  | 243.39219  | 3  |
| Rno   | 3126.6500 | 659.51091  | 3  |
| ST2   | 853.5867  | 108.60899  | 3  |
| ST3A1 | 885.0133  | 115.04271  | 3  |
| ST3A2 | 793.7633  | 102.81655  | 3  |
| ST3H6 | 2592.9033 | 572.48364  | 3  |
| Tru   | 3247.6667 | 434.25077  | 3  |
| Total | 2081.8357 | 1020.18187 | 42 |

### Levene's Test of Equality of Error Variances<sup>a</sup>

Dependent Variable: Activity

| F     | df1 | df2 | Sig. |
|-------|-----|-----|------|
| 1.532 | 13  | 28  | .167 |

Tests the null hypothesis that the error variance of the dependent variable is equal across groups.<sup>a</sup>

a. Design: Intercept + Sample

### Tests of Between-Subjects Effects

Dependent Variable: Activity

| Source          | Type III Sum of Squares   | df | Mean Square   | F        | Sig. |
|-----------------|---------------------------|----|---------------|----------|------|
| Corrected Model | 38200298.363 <sup>a</sup> | 13 | 2938484.489   | 18.401   | .000 |
| Intercept       | 182029677.534             | 1  | 182029677.534 | 1139.896 | .000 |
| Sample          | 38200298.363              | 13 | 2938484.489   | 18.401   | .000 |
| Error           | 4471314.225               | 28 | 159689.794    |          |      |
| Total           | 224701290.122             | 42 |               |          |      |
| Corrected Total | 42671612.588              | 41 |               |          |      |

a. R Squared = .895 (Adjusted R Squared = .847)

### Estimated Marginal Means

Sample

Dependent Variable: Activity

| Sample | Mean | Std. Error | 95% Confidence Interval |
|--------|------|------------|-------------------------|
|--------|------|------------|-------------------------|

|       |          |         | Lower Bound | Upper Bound |
|-------|----------|---------|-------------|-------------|
| A5    | 2197.367 | 230.716 | 1724.766    | 2669.967    |
| B1    | 2440.053 | 230.716 | 1967.453    | 2912.654    |
| Ctrl  | 2451.617 | 230.716 | 1979.016    | 2924.217    |
| Dre   | 2660.137 | 230.716 | 2187.536    | 3132.737    |
| G1    | 2620.697 | 230.716 | 2148.096    | 3093.297    |
| Gac   | 3065.880 | 230.716 | 2593.279    | 3538.481    |
| Gga   | 2011.297 | 230.716 | 1538.696    | 2483.897    |
| Neg   | 199.070  | 230.716 | -273.531    | 671.671     |
| Rno   | 3126.650 | 230.716 | 2654.049    | 3599.251    |
| ST2   | 853.587  | 230.716 | 380.986     | 1326.187    |
| ST3A1 | 885.013  | 230.716 | 412.413     | 1357.614    |
| ST3A2 | 793.763  | 230.716 | 321.163     | 1266.364    |
| ST3H6 | 2592.903 | 230.716 | 2120.303    | 3065.504    |
| Tru   | 3247.667 | 230.716 | 2775.066    | 3720.267    |

## Post Hoc Tests

### Sample

#### Multiple Comparisons

Dependent Variable: Activity

Bonferroni

| (I) Sample | (J) Sample | Mean Difference<br>(I-J) | Std. Error | Sig.  | 95% Confidence Interval |             |
|------------|------------|--------------------------|------------|-------|-------------------------|-------------|
|            |            |                          |            |       | Lower Bound             | Upper Bound |
| A5         | B1         | -242.6867                | 326.28188  | 1.000 | -1515.1029              | 1029.7296   |
|            | Ctrl       | -254.2500                | 326.28188  | 1.000 | -1526.6662              | 1018.1662   |
|            | Dre        | -462.7700                | 326.28188  | 1.000 | -1735.1862              | 809.6462    |
|            | G1         | -423.3300                | 326.28188  | 1.000 | -1695.7462              | 849.0862    |
|            | Gac        | -868.5133                | 326.28188  | 1.000 | -2140.9296              | 403.9029    |
|            | Gga        | 186.0700                 | 326.28188  | 1.000 | -1086.3462              | 1458.4862   |
|            | Neg        | 1998.2967*               | 326.28188  | .000  | 725.8804                | 3270.7129   |
|            | Rno        | -929.2833                | 326.28188  | .742  | -2201.6996              | 343.1329    |
|            | ST2        | 1343.7800*               | 326.28188  | .028  | 71.3638                 | 2616.1962   |
|            | ST3A1      | 1312.3533*               | 326.28188  | .036  | 39.9371                 | 2584.7696   |
|            | ST3A2      | 1403.6033*               | 326.28188  | .017  | 131.1871                | 2676.0196   |
|            | ST3H6      | -395.5367                | 326.28188  | 1.000 | -1667.9529              | 876.8796    |
|            | Tru        | -1050.3000               | 326.28188  | .295  | -2322.7162              | 222.1162    |
| B1         | A5         | 242.6867                 | 326.28188  | 1.000 | -1029.7296              | 1515.1029   |
|            | Ctrl       | -11.5633                 | 326.28188  | 1.000 | -1283.9796              | 1260.8529   |
|            | Dre        | -220.0833                | 326.28188  | 1.000 | -1492.4996              | 1052.3329   |

|      |       |            |           |       |            |           |
|------|-------|------------|-----------|-------|------------|-----------|
|      | G1    | -180.6433  | 326.28188 | 1.000 | -1453.0596 | 1091.7729 |
|      | Gac   | -625.8267  | 326.28188 | 1.000 | -1898.2429 | 646.5896  |
|      | Gga   | 428.7567   | 326.28188 | 1.000 | -843.6596  | 1701.1729 |
|      | Neg   | 2240.9833* | 326.28188 | .000  | 968.5671   | 3513.3996 |
|      | Rno   | -686.5967  | 326.28188 | 1.000 | -1959.0129 | 585.8196  |
|      | ST2   | 1586.4667* | 326.28188 | .004  | 314.0504   | 2858.8829 |
|      | ST3A1 | 1555.0400* | 326.28188 | .005  | 282.6238   | 2827.4562 |
|      | ST3A2 | 1646.2900* | 326.28188 | .002  | 373.8738   | 2918.7062 |
|      | ST3H6 | -152.8500  | 326.28188 | 1.000 | -1425.2662 | 1119.5662 |
|      | Tru   | -807.6133  | 326.28188 | 1.000 | -2080.0296 | 464.8029  |
| Ctrl | A5    | 254.2500   | 326.28188 | 1.000 | -1018.1662 | 1526.6662 |
|      | B1    | 11.5633    | 326.28188 | 1.000 | -1260.8529 | 1283.9796 |
|      | Dre   | -208.5200  | 326.28188 | 1.000 | -1480.9362 | 1063.8962 |
|      | G1    | -169.0800  | 326.28188 | 1.000 | -1441.4962 | 1103.3362 |
|      | Gac   | -614.2633  | 326.28188 | 1.000 | -1886.6796 | 658.1529  |
|      | Gga   | 440.3200   | 326.28188 | 1.000 | -832.0962  | 1712.7362 |
|      | Neg   | 2252.5467* | 326.28188 | .000  | 980.1304   | 3524.9629 |
|      | Rno   | -675.0333  | 326.28188 | 1.000 | -1947.4496 | 597.3829  |
|      | ST2   | 1598.0300* | 326.28188 | .003  | 325.6138   | 2870.4462 |
|      | ST3A1 | 1566.6033* | 326.28188 | .004  | 294.1871   | 2839.0196 |
|      | ST3A2 | 1657.8533* | 326.28188 | .002  | 385.4371   | 2930.2696 |
|      | ST3H6 | -141.2867  | 326.28188 | 1.000 | -1413.7029 | 1131.1296 |
|      | Tru   | -796.0500  | 326.28188 | 1.000 | -2068.4662 | 476.3662  |
| Dre  | A5    | 462.7700   | 326.28188 | 1.000 | -809.6462  | 1735.1862 |
|      | B1    | 220.0833   | 326.28188 | 1.000 | -1052.3329 | 1492.4996 |
|      | Ctrl  | 208.5200   | 326.28188 | 1.000 | -1063.8962 | 1480.9362 |
|      | G1    | 39.4400    | 326.28188 | 1.000 | -1232.9762 | 1311.8562 |
|      | Gac   | -405.7433  | 326.28188 | 1.000 | -1678.1596 | 866.6729  |
|      | Gga   | 648.8400   | 326.28188 | 1.000 | -623.5762  | 1921.2562 |
|      | Neg   | 2461.0667* | 326.28188 | .000  | 1188.6504  | 3733.4829 |
|      | Rno   | -466.5133  | 326.28188 | 1.000 | -1738.9296 | 805.9029  |
|      | ST2   | 1806.5500* | 326.28188 | .001  | 534.1338   | 3078.9662 |
|      | ST3A1 | 1775.1233* | 326.28188 | .001  | 502.7071   | 3047.5396 |
|      | ST3A2 | 1866.3733* | 326.28188 | .000  | 593.9571   | 3138.7896 |
|      | ST3H6 | 67.2333    | 326.28188 | 1.000 | -1205.1829 | 1339.6496 |
|      | Tru   | -587.5300  | 326.28188 | 1.000 | -1859.9462 | 684.8862  |
| G1   | A5    | 423.3300   | 326.28188 | 1.000 | -849.0862  | 1695.7462 |
|      | B1    | 180.6433   | 326.28188 | 1.000 | -1091.7729 | 1453.0596 |
|      | Ctrl  | 169.0800   | 326.28188 | 1.000 | -1103.3362 | 1441.4962 |
|      | Dre   | -39.4400   | 326.28188 | 1.000 | -1311.8562 | 1232.9762 |
|      | Gac   | -445.1833  | 326.28188 | 1.000 | -1717.5996 | 827.2329  |

|     |       |             |           |       |            |            |
|-----|-------|-------------|-----------|-------|------------|------------|
|     | Gga   | 609.4000    | 326.28188 | 1.000 | -663.0162  | 1881.8162  |
|     | Neg   | 2421.6267*  | 326.28188 | .000  | 1149.2104  | 3694.0429  |
|     | Rno   | -505.9533   | 326.28188 | 1.000 | -1778.3696 | 766.4629   |
|     | ST2   | 1767.1100*  | 326.28188 | .001  | 494.6938   | 3039.5262  |
|     | ST3A1 | 1735.6833*  | 326.28188 | .001  | 463.2671   | 3008.0996  |
|     | ST3A2 | 1826.9333*  | 326.28188 | .000  | 554.5171   | 3099.3496  |
|     | ST3H6 | 27.7933     | 326.28188 | 1.000 | -1244.6229 | 1300.2096  |
|     | Tru   | -626.9700   | 326.28188 | 1.000 | -1899.3862 | 645.4462   |
| Gac | A5    | 868.5133    | 326.28188 | 1.000 | -403.9029  | 2140.9296  |
|     | B1    | 625.8267    | 326.28188 | 1.000 | -646.5896  | 1898.2429  |
|     | Ctrl  | 614.2633    | 326.28188 | 1.000 | -658.1529  | 1886.6796  |
|     | Dre   | 405.7433    | 326.28188 | 1.000 | -866.6729  | 1678.1596  |
|     | G1    | 445.1833    | 326.28188 | 1.000 | -827.2329  | 1717.5996  |
|     | Gga   | 1054.5833   | 326.28188 | .286  | -217.8329  | 2326.9996  |
|     | Neg   | 2866.8100*  | 326.28188 | .000  | 1594.3938  | 4139.2262  |
|     | Rno   | -60.7700    | 326.28188 | 1.000 | -1333.1862 | 1211.6462  |
|     | ST2   | 2212.2933*  | 326.28188 | .000  | 939.8771   | 3484.7096  |
|     | ST3A1 | 2180.8667*  | 326.28188 | .000  | 908.4504   | 3453.2829  |
|     | ST3A2 | 2272.1167*  | 326.28188 | .000  | 999.7004   | 3544.5329  |
|     | ST3H6 | 472.9767    | 326.28188 | 1.000 | -799.4396  | 1745.3929  |
|     | Tru   | -181.7867   | 326.28188 | 1.000 | -1454.2029 | 1090.6296  |
| Gga | A5    | -186.0700   | 326.28188 | 1.000 | -1458.4862 | 1086.3462  |
|     | B1    | -428.7567   | 326.28188 | 1.000 | -1701.1729 | 843.6596   |
|     | Ctrl  | -440.3200   | 326.28188 | 1.000 | -1712.7362 | 832.0962   |
|     | Dre   | -648.8400   | 326.28188 | 1.000 | -1921.2562 | 623.5762   |
|     | G1    | -609.4000   | 326.28188 | 1.000 | -1881.8162 | 663.0162   |
|     | Gac   | -1054.5833  | 326.28188 | .286  | -2326.9996 | 217.8329   |
|     | Neg   | 1812.2267*  | 326.28188 | .001  | 539.8104   | 3084.6429  |
|     | Rno   | -1115.3533  | 326.28188 | .177  | -2387.7696 | 157.0629   |
|     | ST2   | 1157.7100   | 326.28188 | .127  | -114.7062  | 2430.1262  |
|     | ST3A1 | 1126.2833   | 326.28188 | .163  | -146.1329  | 2398.6996  |
|     | ST3A2 | 1217.5333   | 326.28188 | .078  | -54.8829   | 2489.9496  |
|     | ST3H6 | -581.6067   | 326.28188 | 1.000 | -1854.0229 | 690.8096   |
|     | Tru   | -1236.3700  | 326.28188 | .067  | -2508.7862 | 36.0462    |
| Neg | A5    | -1998.2967* | 326.28188 | .000  | -3270.7129 | -725.8804  |
|     | B1    | -2240.9833* | 326.28188 | .000  | -3513.3996 | -968.5671  |
|     | Ctrl  | -2252.5467* | 326.28188 | .000  | -3524.9629 | -980.1304  |
|     | Dre   | -2461.0667* | 326.28188 | .000  | -3733.4829 | -1188.6504 |
|     | G1    | -2421.6267* | 326.28188 | .000  | -3694.0429 | -1149.2104 |
|     | Gac   | -2866.8100* | 326.28188 | .000  | -4139.2262 | -1594.3938 |
|     | Gga   | -1812.2267* | 326.28188 | .001  | -3084.6429 | -539.8104  |

|       |       |             |           |       |            |            |
|-------|-------|-------------|-----------|-------|------------|------------|
|       | Rno   | -2927.5800* | 326.28188 | .000  | -4199.9962 | -1655.1638 |
|       | ST2   | -654.5167   | 326.28188 | 1.000 | -1926.9329 | 617.8996   |
|       | ST3A1 | -685.9433   | 326.28188 | 1.000 | -1958.3596 | 586.4729   |
|       | ST3A2 | -594.6933   | 326.28188 | 1.000 | -1867.1096 | 677.7229   |
|       | ST3H6 | -2393.8333* | 326.28188 | .000  | -3666.2496 | -1121.4171 |
|       | Tru   | -3048.5967* | 326.28188 | .000  | -4321.0129 | -1776.1804 |
| Rno   | A5    | 929.2833    | 326.28188 | .742  | -343.1329  | 2201.6996  |
|       | B1    | 686.5967    | 326.28188 | 1.000 | -585.8196  | 1959.0129  |
|       | Ctrl  | 675.0333    | 326.28188 | 1.000 | -597.3829  | 1947.4496  |
|       | Dre   | 466.5133    | 326.28188 | 1.000 | -805.9029  | 1738.9296  |
|       | G1    | 505.9533    | 326.28188 | 1.000 | -766.4629  | 1778.3696  |
|       | Gac   | 60.7700     | 326.28188 | 1.000 | -1211.6462 | 1333.1862  |
|       | Gga   | 1115.3533   | 326.28188 | .177  | -157.0629  | 2387.7696  |
|       | Neg   | 2927.5800*  | 326.28188 | .000  | 1655.1638  | 4199.9962  |
|       | ST2   | 2273.0633*  | 326.28188 | .000  | 1000.6471  | 3545.4796  |
|       | ST3A1 | 2241.6367*  | 326.28188 | .000  | 969.2204   | 3514.0529  |
|       | ST3A2 | 2332.8867*  | 326.28188 | .000  | 1060.4704  | 3605.3029  |
|       | ST3H6 | 533.7467    | 326.28188 | 1.000 | -738.6696  | 1806.1629  |
|       | Tru   | -121.0167   | 326.28188 | 1.000 | -1393.4329 | 1151.3996  |
| ST2   | A5    | -1343.7800* | 326.28188 | .028  | -2616.1962 | -71.3638   |
|       | B1    | -1586.4667* | 326.28188 | .004  | -2858.8829 | -314.0504  |
|       | Ctrl  | -1598.0300* | 326.28188 | .003  | -2870.4462 | -325.6138  |
|       | Dre   | -1806.5500* | 326.28188 | .001  | -3078.9662 | -534.1338  |
|       | G1    | -1767.1100* | 326.28188 | .001  | -3039.5262 | -494.6938  |
|       | Gac   | -2212.2933* | 326.28188 | .000  | -3484.7096 | -939.8771  |
|       | Gga   | -1157.7100  | 326.28188 | .127  | -2430.1262 | 114.7062   |
|       | Neg   | 654.5167    | 326.28188 | 1.000 | -617.8996  | 1926.9329  |
|       | Rno   | -2273.0633* | 326.28188 | .000  | -3545.4796 | -1000.6471 |
|       | ST3A1 | -31.4267    | 326.28188 | 1.000 | -1303.8429 | 1240.9896  |
|       | ST3A2 | 59.8233     | 326.28188 | 1.000 | -1212.5929 | 1332.2396  |
|       | ST3H6 | -1739.3167* | 326.28188 | .001  | -3011.7329 | -466.9004  |
|       | Tru   | -2394.0800* | 326.28188 | .000  | -3666.4962 | -1121.6638 |
| ST3A1 | A5    | -1312.3533* | 326.28188 | .036  | -2584.7696 | -39.9371   |
|       | B1    | -1555.0400* | 326.28188 | .005  | -2827.4562 | -282.6238  |
|       | Ctrl  | -1566.6033* | 326.28188 | .004  | -2839.0196 | -294.1871  |
|       | Dre   | -1775.1233* | 326.28188 | .001  | -3047.5396 | -502.7071  |
|       | G1    | -1735.6833* | 326.28188 | .001  | -3008.0996 | -463.2671  |
|       | Gac   | -2180.8667* | 326.28188 | .000  | -3453.2829 | -908.4504  |
|       | Gga   | -1126.2833  | 326.28188 | .163  | -2398.6996 | 146.1329   |
|       | Neg   | 685.9433    | 326.28188 | 1.000 | -586.4729  | 1958.3596  |
|       | Rno   | -2241.6367* | 326.28188 | .000  | -3514.0529 | -969.2204  |

|       |       |             |           |       |            |            |
|-------|-------|-------------|-----------|-------|------------|------------|
|       | ST2   | 31.4267     | 326.28188 | 1.000 | -1240.9896 | 1303.8429  |
|       | ST3A2 | 91.2500     | 326.28188 | 1.000 | -1181.1662 | 1363.6662  |
|       | ST3H6 | -1707.8900* | 326.28188 | .001  | -2980.3062 | -435.4738  |
|       | Tru   | -2362.6533* | 326.28188 | .000  | -3635.0696 | -1090.2371 |
| ST3A2 | A5    | -1403.6033* | 326.28188 | .017  | -2676.0196 | -131.1871  |
|       | B1    | -1646.2900* | 326.28188 | .002  | -2918.7062 | -373.8738  |
|       | Ctrl  | -1657.8533* | 326.28188 | .002  | -2930.2696 | -385.4371  |
|       | Dre   | -1866.3733* | 326.28188 | .000  | -3138.7896 | -593.9571  |
|       | G1    | -1826.9333* | 326.28188 | .000  | -3099.3496 | -554.5171  |
|       | Gac   | -2272.1167* | 326.28188 | .000  | -3544.5329 | -999.7004  |
|       | Gga   | -1217.5333  | 326.28188 | .078  | -2489.9496 | 54.8829    |
|       | Neg   | 594.6933    | 326.28188 | 1.000 | -677.7229  | 1867.1096  |
|       | Rno   | -2332.8867* | 326.28188 | .000  | -3605.3029 | -1060.4704 |
|       | ST2   | -59.8233    | 326.28188 | 1.000 | -1332.2396 | 1212.5929  |
|       | ST3A1 | -91.2500    | 326.28188 | 1.000 | -1363.6662 | 1181.1662  |
|       | ST3H6 | -1799.1400* | 326.28188 | .001  | -3071.5562 | -526.7238  |
|       | Tru   | -2453.9033* | 326.28188 | .000  | -3726.3196 | -1181.4871 |
| ST3H6 | A5    | 395.5367    | 326.28188 | 1.000 | -876.8796  | 1667.9529  |
|       | B1    | 152.8500    | 326.28188 | 1.000 | -1119.5662 | 1425.2662  |
|       | Ctrl  | 141.2867    | 326.28188 | 1.000 | -1131.1296 | 1413.7029  |
|       | Dre   | -67.2333    | 326.28188 | 1.000 | -1339.6496 | 1205.1829  |
|       | G1    | -27.7933    | 326.28188 | 1.000 | -1300.2096 | 1244.6229  |
|       | Gac   | -472.9767   | 326.28188 | 1.000 | -1745.3929 | 799.4396   |
|       | Gga   | 581.6067    | 326.28188 | 1.000 | -690.8096  | 1854.0229  |
|       | Neg   | 2393.8333*  | 326.28188 | .000  | 1121.4171  | 3666.2496  |
|       | Rno   | -533.7467   | 326.28188 | 1.000 | -1806.1629 | 738.6696   |
|       | ST2   | 1739.3167*  | 326.28188 | .001  | 466.9004   | 3011.7329  |
|       | ST3A1 | 1707.8900*  | 326.28188 | .001  | 435.4738   | 2980.3062  |
|       | ST3A2 | 1799.1400*  | 326.28188 | .001  | 526.7238   | 3071.5562  |
|       | Tru   | -654.7633   | 326.28188 | 1.000 | -1927.1796 | 617.6529   |
| Tru   | A5    | 1050.3000   | 326.28188 | .295  | -222.1162  | 2322.7162  |
|       | B1    | 807.6133    | 326.28188 | 1.000 | -464.8029  | 2080.0296  |
|       | Ctrl  | 796.0500    | 326.28188 | 1.000 | -476.3662  | 2068.4662  |
|       | Dre   | 587.5300    | 326.28188 | 1.000 | -684.8862  | 1859.9462  |
|       | G1    | 626.9700    | 326.28188 | 1.000 | -645.4462  | 1899.3862  |
|       | Gac   | 181.7867    | 326.28188 | 1.000 | -1090.6296 | 1454.2029  |
|       | Gga   | 1236.3700   | 326.28188 | .067  | -36.0462   | 2508.7862  |
|       | Neg   | 3048.5967*  | 326.28188 | .000  | 1776.1804  | 4321.0129  |
|       | Rno   | 121.0167    | 326.28188 | 1.000 | -1151.3996 | 1393.4329  |
|       | ST2   | 2394.0800*  | 326.28188 | .000  | 1121.6638  | 3666.4962  |



|       |            |           |       |           |           |
|-------|------------|-----------|-------|-----------|-----------|
| ST3A1 | 2362.6533* | 326.28188 | .000  | 1090.2371 | 3635.0696 |
| ST3A2 | 2453.9033* | 326.28188 | .000  | 1181.4871 | 3726.3196 |
| ST3H6 | 654.7633   | 326.28188 | 1.000 | -617.6529 | 1927.1796 |

Based on observed means.

The error term is Mean Square(Error) = 159689.794.

\*. The mean difference is significant at the .05 level.

## Profile Plots

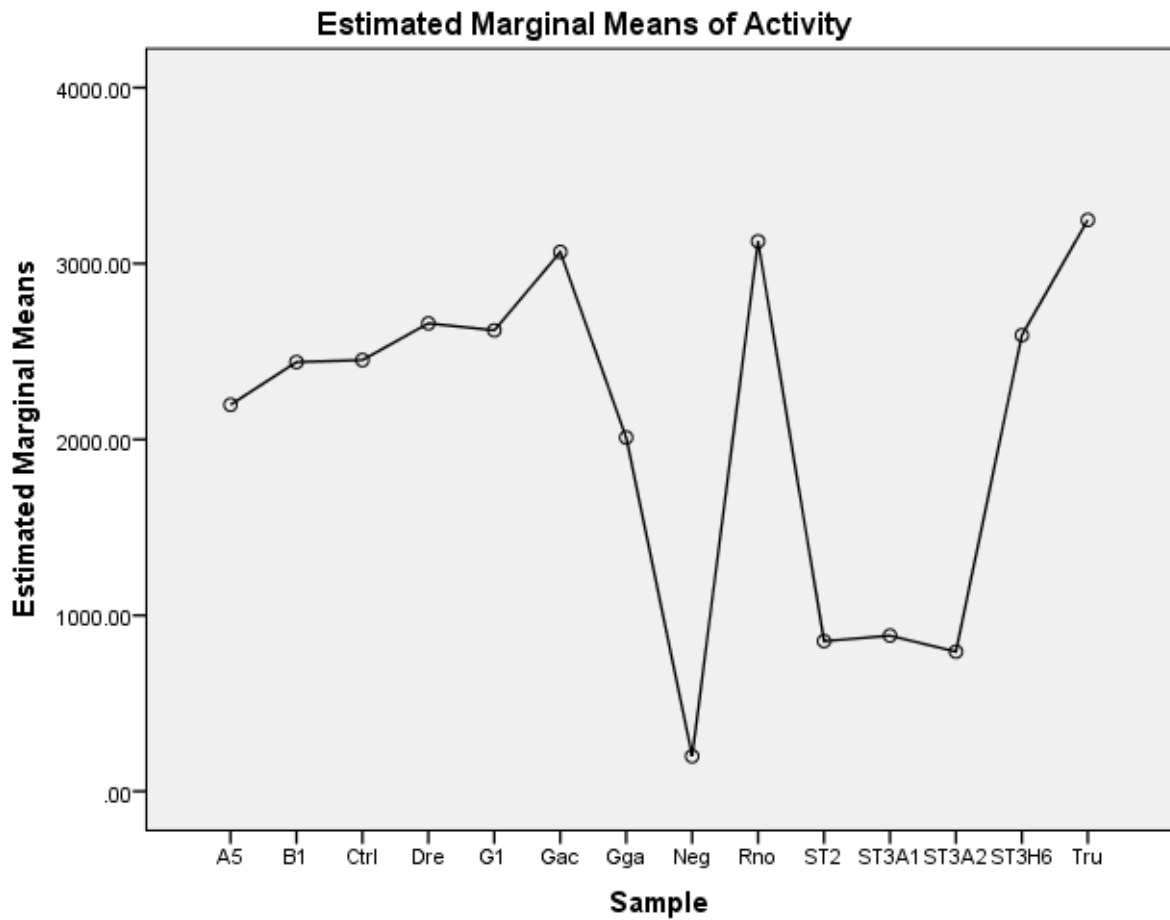

Supplement: Fig3_RawDataSet2.pdf [file Fig3_RawDataSet2.pdf]
