# Supplementary material for: Engineering of CHO cells for the production of vertebrate recombinant sialyltransferases
Source: PeerJ journal article supplement (doi:10.7717/peerj.5788), 2019-02-11

```

UNIANOVA RCA_I BY Sample
  /METHOD=SSTYPE(3)
  /INTERCEPT=INCLUDE
  /POSTHOC=Sample(BONFERRONI)
  /PLOT=PROFILE(Sample)
  /EMMEANS=TABLES(Sample)
  /PRINT=HOMOGENEITY DESCRIPTIVE
  /CRITERIA=ALPHA(.05)
  /DESIGN=Sample.

```

## Univariate Analysis of Variance

| Label for Statistics | Corresponding in Manuscript    |
|----------------------|--------------------------------|
| ASF                  | ASF (Asialofetuin)             |
| FET                  | FET (Fetuin)                   |
| A5                   | hST6 A5                        |
| B1                   | hST6 B1                        |
| G1                   | hST6                           |
| Dre                  | zST6                           |
| Gac                  | sST6                           |
| Tru                  | fST6                           |
| Gga                  | cST6                           |
| Rno                  | rST6                           |
| Ctrl                 | mST6 (commercial mouse enzyme) |
| ST3A2                | hST3 A2                        |
| ST3A1                | hST3 A2                        |
| ST3H6                | zST3                           |
| ST2                  | hST6Gal2                       |

### Notes

|                           |                                                                   |
|---------------------------|-------------------------------------------------------------------|
| Output Created            | 12-JUL-2018 14:55:49                                              |
| Comments                  |                                                                   |
| Input                     | \\gweng.gmadtree.gmit.ie\STAFF\Beno<br>it.Houeix\Documents\ST.sav |
| Data                      |                                                                   |
| Active Dataset            | DataSet1                                                          |
| Filter                    | <none>                                                            |
| Weight                    | <none>                                                            |
| Split File                | <none>                                                            |
| N of Rows in Working Data |                                                                   |
| File                      |                                                                   |

|                        |                       |                                                                                                                                                                                                                                          |
|------------------------|-----------------------|------------------------------------------------------------------------------------------------------------------------------------------------------------------------------------------------------------------------------------------|
| Missing Value Handling | Definition of Missing | User-defined missing values are treated as missing.                                                                                                                                                                                      |
|                        | Cases Used            | Statistics are based on all cases with valid data for all variables in the model.                                                                                                                                                        |
| Syntax                 |                       | <pre> UNIANOVA RCA_I BY Sample   /METHOD=SSTYPE(3)   /INTERCEPT=INCLUDE   /POSTHOC=Sample(BONFERRONI)   /PLOT=PROFILE(Sample)   /EMMEANS=TABLES(Sample)   /PRINT=HOMOGENEITY DESCRIPTIVE   /CRITERIA=ALPHA(.05)   /DESIGN=Sample. </pre> |
| Resources              | Processor Time        | 00:00:00.17                                                                                                                                                                                                                              |
|                        | Elapsed Time          | 00:00:00.20                                                                                                                                                                                                                              |

#### Between-Subjects Factors

|        | Value Label | N |
|--------|-------------|---|
| Sample | A5          | 3 |
|        | ASF         | 3 |
|        | B1          | 3 |
|        | Ctrl        | 3 |
|        | Dre         | 3 |
|        | G1          | 3 |
|        | Gac         | 3 |
|        | Gga         | 3 |
|        | Rno         | 3 |
|        | Tru         | 3 |

#### Descriptive Statistics

Dependent Variable: RCA\_I

| Sample | Mean   | Std. Deviation | N |
|--------|--------|----------------|---|
| A5     | -.6163 | .09645         | 3 |
| ASF    | -.0001 | .11230         | 3 |
| B1     | -.6739 | .08488         | 3 |
| Ctrl   | -.7016 | .04817         | 3 |
| Dre    | -.4966 | .14420         | 3 |

|       |        |        |    |
|-------|--------|--------|----|
| G1    | -.5872 | .18771 | 3  |
| Gac   | -.4787 | .09506 | 3  |
| Gga   | -.7201 | .10144 | 3  |
| Rno   | -.5594 | .08450 | 3  |
| Tru   | -.4295 | .04832 | 3  |
| Total | -.5263 | .22048 | 30 |

### Levene's Test of Equality of Error Variances<sup>a</sup>

Dependent Variable: RCA\_I

| F     | df1 | df2 | Sig. |
|-------|-----|-----|------|
| 1.589 | 9   | 20  | .186 |

Tests the null hypothesis that the error variance of the dependent variable is equal across groups.<sup>a</sup>

a. Design: Intercept + Sample

### Tests of Between-Subjects Effects

Dependent Variable: RCA\_I

| Source          | Type III Sum of Squares | df | Mean Square | F       | Sig. |
|-----------------|-------------------------|----|-------------|---------|------|
| Corrected Model | 1.177 <sup>a</sup>      | 9  | .131        | 11.249  | .000 |
| Intercept       | 8.311                   | 1  | 8.311       | 714.805 | .000 |
| Sample          | 1.177                   | 9  | .131        | 11.249  | .000 |
| Error           | .233                    | 20 | .012        |         |      |
| Total           | 9.721                   | 30 |             |         |      |
| Corrected Total | 1.410                   | 29 |             |         |      |

a. R Squared = .835 (Adjusted R Squared = .761)

## Estimated Marginal Means

### Sample

Dependent Variable: RCA\_I

| Sample | Mean | Std. Error | 95% Confidence Interval |             |
|--------|------|------------|-------------------------|-------------|
|        |      |            | Lower Bound             | Upper Bound |
|        |      |            |                         |             |

|      |           |      |       |       |
|------|-----------|------|-------|-------|
| A5   | -.616     | .062 | -.746 | -.486 |
| ASF  | -1.000E-4 | .062 | -.130 | .130  |
| B1   | -.674     | .062 | -.804 | -.544 |
| Ctrl | -.702     | .062 | -.831 | -.572 |
| Dre  | -.497     | .062 | -.626 | -.367 |
| G1   | -.587     | .062 | -.717 | -.457 |
| Gac  | -.479     | .062 | -.609 | -.349 |
| Gga  | -.720     | .062 | -.850 | -.590 |
| Rno  | -.559     | .062 | -.689 | -.430 |
| Tru  | -.429     | .062 | -.559 | -.300 |

## Post Hoc Tests

### Sample

#### Multiple Comparisons

Dependent Variable: RCA\_I

Bonferroni

| (I) Sample | (J) Sample | Mean<br>Difference (I-J) | Std. Error | Sig.  | 95% Confidence Interval |             |
|------------|------------|--------------------------|------------|-------|-------------------------|-------------|
|            |            |                          |            |       | Lower Bound             | Upper Bound |
| A5         | ASF        | -.6162*                  | .08804     | .000  | -.9511                  | -.2813      |
|            | B1         | .0576                    | .08804     | 1.000 | -.2774                  | .3925       |
|            | Ctrl       | .0853                    | .08804     | 1.000 | -.2496                  | .4203       |
|            | Dre        | -.1197                   | .08804     | 1.000 | -.4547                  | .2152       |
|            | G1         | -.0291                   | .08804     | 1.000 | -.3640                  | .3058       |
|            | Gac        | -.1376                   | .08804     | 1.000 | -.4725                  | .1974       |
|            | Gga        | .1038                    | .08804     | 1.000 | -.2311                  | .4387       |
|            | Rno        | -.0569                   | .08804     | 1.000 | -.3918                  | .2781       |
|            | Tru        | -.1868                   | .08804     | 1.000 | -.5218                  | .1481       |
| ASF        | A5         | .6162*                   | .08804     | .000  | .2813                   | .9511       |
|            | B1         | .6738*                   | .08804     | .000  | .3388                   | 1.0087      |
|            | Ctrl       | .7015*                   | .08804     | .000  | .3666                   | 1.0365      |
|            | Dre        | .4965*                   | .08804     | .001  | .1615                   | .8314       |

|      |      |         |        |       |         |        |
|------|------|---------|--------|-------|---------|--------|
|      | G1   | .5871*  | .08804 | .000  | .2522   | .9220  |
|      | Gac  | .4786*  | .08804 | .001  | .1437   | .8136  |
|      | Gga  | .7200*  | .08804 | .000  | .3851   | 1.0549 |
|      | Rno  | .5593*  | .08804 | .000  | .2244   | .8943  |
|      | Tru  | .4294*  | .08804 | .004  | .0944   | .7643  |
| B1   | A5   | -.0576  | .08804 | 1.000 | -.3925  | .2774  |
|      | ASF  | -.6738* | .08804 | .000  | -1.0087 | -.3388 |
|      | Ctrl | .0278   | .08804 | 1.000 | -.3072  | .3627  |
|      | Dre  | -.1773  | .08804 | 1.000 | -.5122  | .1576  |
|      | G1   | -.0867  | .08804 | 1.000 | -.4216  | .2483  |
|      | Gac  | -.1951  | .08804 | 1.000 | -.5301  | .1398  |
|      | Gga  | .0462   | .08804 | 1.000 | -.2887  | .3812  |
|      | Rno  | -.1144  | .08804 | 1.000 | -.4494  | .2205  |
|      | Tru  | -.2444  | .08804 | .525  | -.5793  | .0905  |
| Ctrl | A5   | -.0853  | .08804 | 1.000 | -.4203  | .2496  |
|      | ASF  | -.7015* | .08804 | .000  | -1.0365 | -.3666 |
|      | B1   | -.0278  | .08804 | 1.000 | -.3627  | .3072  |
|      | Dre  | -.2051  | .08804 | 1.000 | -.5400  | .1299  |
|      | G1   | -.1144  | .08804 | 1.000 | -.4494  | .2205  |
|      | Gac  | -.2229  | .08804 | .893  | -.5578  | .1120  |
|      | Gga  | .0185   | .08804 | 1.000 | -.3165  | .3534  |
|      | Rno  | -.1422  | .08804 | 1.000 | -.4771  | .1927  |
|      | Tru  | -.2722  | .08804 | .259  | -.6071  | .0628  |
| Dre  | A5   | .1197   | .08804 | 1.000 | -.2152  | .4547  |
|      | ASF  | -.4965* | .08804 | .001  | -.8314  | -.1615 |
|      | B1   | .1773   | .08804 | 1.000 | -.1576  | .5122  |
|      | Ctrl | .2051   | .08804 | 1.000 | -.1299  | .5400  |
|      | G1   | .0906   | .08804 | 1.000 | -.2443  | .4256  |
|      | Gac  | -.0178  | .08804 | 1.000 | -.3528  | .3171  |
|      | Gga  | .2235   | .08804 | .879  | -.1114  | .5585  |
|      | Rno  | .0629   | .08804 | 1.000 | -.2721  | .3978  |
|      | Tru  | -.0671  | .08804 | 1.000 | -.4020  | .2678  |
| G1   | A5   | .0291   | .08804 | 1.000 | -.3058  | .3640  |
|      | ASF  | -.5871* | .08804 | .000  | -.9220  | -.2522 |
|      | B1   | .0867   | .08804 | 1.000 | -.2483  | .4216  |
|      | Ctrl | .1144   | .08804 | 1.000 | -.2205  | .4494  |
|      | Dre  | -.0906  | .08804 | 1.000 | -.4256  | .2443  |
|      | Gac  | -.1085  | .08804 | 1.000 | -.4434  | .2265  |
|      | Gga  | .1329   | .08804 | 1.000 | -.2020  | .4678  |
|      | Rno  | -.0278  | .08804 | 1.000 | -.3627  | .3072  |
|      | Tru  | -.1577  | .08804 | 1.000 | -.4927  | .1772  |

|     |      |         |        |       |         |        |
|-----|------|---------|--------|-------|---------|--------|
| Gac | A5   | .1376   | .08804 | 1.000 | -.1974  | .4725  |
|     | ASF  | -.4786* | .08804 | .001  | -.8136  | -.1437 |
|     | B1   | .1951   | .08804 | 1.000 | -.1398  | .5301  |
|     | Ctrl | .2229   | .08804 | .893  | -.1120  | .5578  |
|     | Dre  | .0178   | .08804 | 1.000 | -.3171  | .3528  |
|     | G1   | .1085   | .08804 | 1.000 | -.2265  | .4434  |
|     | Gga  | .2414   | .08804 | .566  | -.0936  | .5763  |
|     | Rno  | .0807   | .08804 | 1.000 | -.2542  | .4156  |
|     | Tru  | -.0493  | .08804 | 1.000 | -.3842  | .2857  |
| Gga | A5   | -.1038  | .08804 | 1.000 | -.4387  | .2311  |
|     | ASF  | -.7200* | .08804 | .000  | -1.0549 | -.3851 |
|     | B1   | -.0462  | .08804 | 1.000 | -.3812  | .2887  |
|     | Ctrl | -.0185  | .08804 | 1.000 | -.3534  | .3165  |
|     | Dre  | -.2235  | .08804 | .879  | -.5585  | .1114  |
|     | G1   | -.1329  | .08804 | 1.000 | -.4678  | .2020  |
|     | Gac  | -.2414  | .08804 | .566  | -.5763  | .0936  |
|     | Rno  | -.1607  | .08804 | 1.000 | -.4956  | .1743  |
|     | Tru  | -.2906  | .08804 | .161  | -.6256  | .0443  |
| Rno | A5   | .0569   | .08804 | 1.000 | -.2781  | .3918  |
|     | ASF  | -.5593* | .08804 | .000  | -.8943  | -.2244 |
|     | B1   | .1144   | .08804 | 1.000 | -.2205  | .4494  |
|     | Ctrl | .1422   | .08804 | 1.000 | -.1927  | .4771  |
|     | Dre  | -.0629  | .08804 | 1.000 | -.3978  | .2721  |
|     | G1   | .0278   | .08804 | 1.000 | -.3072  | .3627  |
|     | Gac  | -.0807  | .08804 | 1.000 | -.4156  | .2542  |
|     | Gga  | .1607   | .08804 | 1.000 | -.1743  | .4956  |
|     | Tru  | -.1300  | .08804 | 1.000 | -.4649  | .2050  |
| Tru | A5   | .1868   | .08804 | 1.000 | -.1481  | .5218  |
|     | ASF  | -.4294* | .08804 | .004  | -.7643  | -.0944 |
|     | B1   | .2444   | .08804 | .525  | -.0905  | .5793  |
|     | Ctrl | .2722   | .08804 | .259  | -.0628  | .6071  |
|     | Dre  | .0671   | .08804 | 1.000 | -.2678  | .4020  |
|     | G1   | .1577   | .08804 | 1.000 | -.1772  | .4927  |
|     | Gac  | .0493   | .08804 | 1.000 | -.2857  | .3842  |
|     | Gga  | .2906   | .08804 | .161  | -.0443  | .6256  |
|     | Rno  | .1300   | .08804 | 1.000 | -.2050  | .4649  |

Based on observed means.

The error term is Mean Square(Error) = .012.

\*. The mean difference is significant at the .05 level.

## Profile Plots

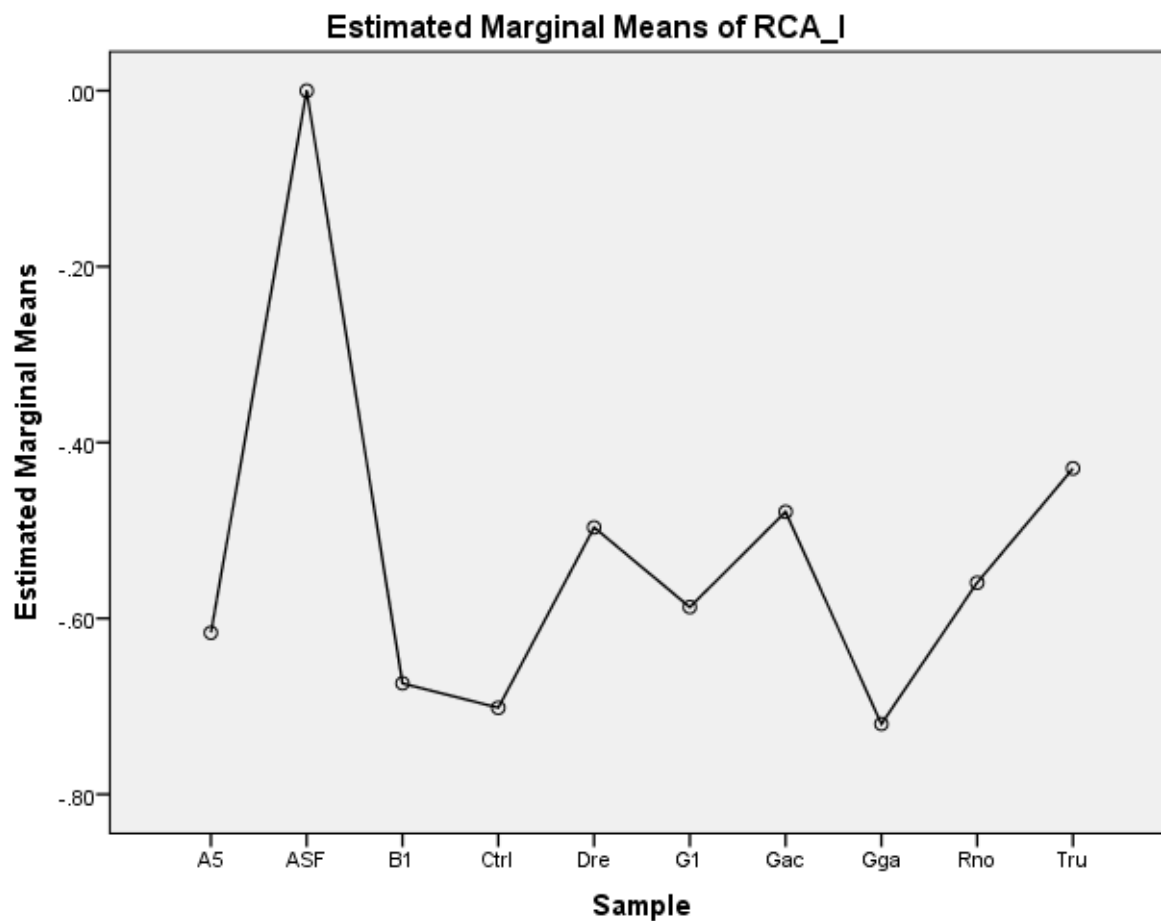

```
UNIANOVA value2 BY Sample
  /METHOD=SSTYPE(3)
  /INTERCEPT=INCLUDE
  /POSTHOC=Sample(BONFERRONI)
  /PLOT=PROFILE(Sample)
  /EMMEANS=TABLES(Sample)
  /PRINT=HOMOGENEITY DESCRIPTIVE
  /CRITERIA=ALPHA(.05)
  /DESIGN=Sample.
```

## Univariate Analysis of Variance - RCA-I values

**Notes**

|                        |                                   |                                                                                                                                                                                                                                         |
|------------------------|-----------------------------------|-----------------------------------------------------------------------------------------------------------------------------------------------------------------------------------------------------------------------------------------|
| Output Created         |                                   | 12-JUL-2018 14:57:35                                                                                                                                                                                                                    |
| Comments               |                                   |                                                                                                                                                                                                                                         |
| Input                  | Data                              | \\gweng.gmadtree.gmit.ie\STAFF\Beno<br>it.Houeix\Documents\ST.sav                                                                                                                                                                       |
|                        | Active Dataset                    | DataSet1                                                                                                                                                                                                                                |
|                        | Filter                            | <none>                                                                                                                                                                                                                                  |
|                        | Weight                            | <none>                                                                                                                                                                                                                                  |
|                        | Split File                        | <none>                                                                                                                                                                                                                                  |
|                        | N of Rows in Working Data<br>File | 48                                                                                                                                                                                                                                      |
| Missing Value Handling | Definition of Missing             | User-defined missing values are<br>treated as missing.                                                                                                                                                                                  |
|                        | Cases Used                        | Statistics are based on all cases with<br>valid data for all variables in the model.                                                                                                                                                    |
| Syntax                 |                                   | UNIANOVA value2 BY Sample<br>/METHOD=SSTYPE(3)<br>/INTERCEPT=INCLUDE<br>/POSTHOC=Sample(BONFERRONI)<br>/PLOT=PROFILE(Sample)<br>/EMMEANS=TABLES(Sample)<br>/PRINT=HOMOGENEITY<br>DESCRIPTIVE<br>/CRITERIA=ALPHA(.05)<br>/DESIGN=Sample. |
| Resources              | Processor Time                    | 00:00:00.19                                                                                                                                                                                                                             |
|                        | Elapsed Time                      | 00:00:00.28                                                                                                                                                                                                                             |

**Between-Subjects Factors**

|        |      | Value Label | N |
|--------|------|-------------|---|
| Sample | A5   | A5          | 3 |
|        | ASF  | ASF         | 3 |
|        | B1   | B1          | 3 |
|        | Ctrl | Ctrl        | 3 |
|        | Dre  | Dre         | 3 |
|        | FET  | FET         | 3 |
|        | G1   | G1          | 3 |



|       |       |   |
|-------|-------|---|
| Gac   | Gac   | 3 |
| Gga   | Gga   | 3 |
| Rno   | Rno   | 3 |
| ST2   | ST2   | 3 |
| ST3A1 | ST3A1 | 3 |
| ST3A2 | ST3A2 | 3 |
| ST3H6 | ST3H6 | 3 |
| Tru   | Tru   | 3 |

### Descriptive Statistics

Dependent Variable: RCA-I

| Sample | Mean    | Std. Deviation | N  |
|--------|---------|----------------|----|
| A5     | 2.72470 | .096450        | 3  |
| ASF    | 3.34090 | .112297        | 3  |
| B1     | 2.66713 | .084883        | 3  |
| Ctrl   | 2.63937 | .048172        | 3  |
| Dre    | 2.84443 | .144199        | 3  |
| FET    | 2.97617 | .064672        | 3  |
| G1     | 2.75380 | .187707        | 3  |
| Gac    | 2.86227 | .095064        | 3  |
| Gga    | 2.62090 | .101442        | 3  |
| Rno    | 2.78157 | .084502        | 3  |
| ST2    | 3.29277 | .083380        | 3  |
| ST3A1  | 2.74630 | .159049        | 3  |
| ST3A2  | 2.88480 | .041250        | 3  |
| ST3H6  | 2.83923 | .263972        | 3  |
| Tru    | 2.91153 | .048318        | 3  |
| Total  | 2.85906 | .230180        | 45 |

### Levene's Test of Equality of Error Variances<sup>a</sup>

Dependent Variable: RCA-I

| F     | df1 | df2 | Sig. |
|-------|-----|-----|------|
| 2.669 | 14  | 30  | .012 |

Tests the null hypothesis that the error variance of the dependent variable is equal across groups.<sup>a</sup>

a. Design: Intercept + Sample

**Tests of Between-Subjects Effects**

Dependent Variable: RCA-I

| Source          | Type III Sum of Squares | df | Mean Square | F         | Sig. |
|-----------------|-------------------------|----|-------------|-----------|------|
| Corrected Model | 1.883 <sup>a</sup>      | 14 | .135        | 9.004     | .000 |
| Intercept       | 367.840                 | 1  | 367.840     | 24622.900 | .000 |
| Sample          | 1.883                   | 14 | .135        | 9.004     | .000 |
| Error           | .448                    | 30 | .015        |           |      |
| Total           | 370.171                 | 45 |             |           |      |
| Corrected Total | 2.331                   | 44 |             |           |      |

a. R Squared = .808 (Adjusted R Squared = .718)

**Estimated Marginal Means**

**Sample**

Dependent Variable: RCA-I

| Sample | Mean  | Std. Error | 95% Confidence Interval |             |
|--------|-------|------------|-------------------------|-------------|
|        |       |            | Lower Bound             | Upper Bound |
| A5     | 2.725 | .071       | 2.581                   | 2.869       |
| ASF    | 3.341 | .071       | 3.197                   | 3.485       |
| B1     | 2.667 | .071       | 2.523                   | 2.811       |
| Ctrl   | 2.639 | .071       | 2.495                   | 2.783       |
| Dre    | 2.844 | .071       | 2.700                   | 2.989       |
| FET    | 2.976 | .071       | 2.832                   | 3.120       |
| G1     | 2.754 | .071       | 2.610                   | 2.898       |
| Gac    | 2.862 | .071       | 2.718                   | 3.006       |
| Gga    | 2.621 | .071       | 2.477                   | 2.765       |
| Rno    | 2.782 | .071       | 2.637                   | 2.926       |
| ST2    | 3.293 | .071       | 3.149                   | 3.437       |
| ST3A1  | 2.746 | .071       | 2.602                   | 2.890       |
| ST3A2  | 2.885 | .071       | 2.741                   | 3.029       |
| ST3H6  | 2.839 | .071       | 2.695                   | 2.983       |
| Tru    | 2.912 | .071       | 2.767                   | 3.056       |

## Post Hoc Tests

### Sample

#### Multiple Comparisons

Dependent Variable: RCA-I

Bonferroni

| (I) Sample | (J) Sample | Mean Difference (I-J) | Std. Error | Sig.  | 95% Confidence Interval |             |
|------------|------------|-----------------------|------------|-------|-------------------------|-------------|
|            |            |                       |            |       | Lower Bound             | Upper Bound |
| A5         | ASF        | -.61620*              | .099796    | .000  | -1.00735                | -.22505     |
|            | B1         | .05757                | .099796    | 1.000 | -.33358                 | .44872      |
|            | Ctrl       | .08533                | .099796    | 1.000 | -.30582                 | .47648      |
|            | Dre        | -.11973               | .099796    | 1.000 | -.51088                 | .27142      |
|            | FET        | -.25147               | .099796    | 1.000 | -.64262                 | .13968      |
|            | G1         | -.02910               | .099796    | 1.000 | -.42025                 | .36205      |
|            | Gac        | -.13757               | .099796    | 1.000 | -.52872                 | .25358      |
|            | Gga        | .10380                | .099796    | 1.000 | -.28735                 | .49495      |
|            | Rno        | -.05687               | .099796    | 1.000 | -.44802                 | .33428      |
|            | ST2        | -.56807*              | .099796    | .000  | -.95922                 | -.17692     |
|            | ST3A1      | -.02160               | .099796    | 1.000 | -.41275                 | .36955      |
|            | ST3A2      | -.16010               | .099796    | 1.000 | -.55125                 | .23105      |
|            | ST3H6      | -.11453               | .099796    | 1.000 | -.50568                 | .27662      |
|            | Tru        | -.18683               | .099796    | 1.000 | -.57798                 | .20432      |
| ASF        | A5         | .61620*               | .099796    | .000  | .22505                  | 1.00735     |
|            | B1         | .67377*               | .099796    | .000  | .28262                  | 1.06492     |
|            | Ctrl       | .70153*               | .099796    | .000  | .31038                  | 1.09268     |
|            | Dre        | .49647*               | .099796    | .003  | .10532                  | .88762      |
|            | FET        | .36473                | .099796    | .103  | -.02642                 | .75588      |
|            | G1         | .58710*               | .099796    | .000  | .19595                  | .97825      |
|            | Gac        | .47863*               | .099796    | .004  | .08748                  | .86978      |
|            | Gga        | .72000*               | .099796    | .000  | .32885                  | 1.11115     |
|            | Rno        | .55933*               | .099796    | .000  | .16818                  | .95048      |
|            | ST2        | .04813                | .099796    | 1.000 | -.34302                 | .43928      |
|            | ST3A1      | .59460*               | .099796    | .000  | .20345                  | .98575      |

|      |       |          |         |       |          |         |
|------|-------|----------|---------|-------|----------|---------|
|      | ST3A2 | .45610*  | .099796 | .008  | .06495   | .84725  |
|      | ST3H6 | .50167*  | .099796 | .002  | .11052   | .89282  |
|      | Tru   | .42937*  | .099796 | .017  | .03822   | .82052  |
| B1   | A5    | -.05757  | .099796 | 1.000 | -.44872  | .33358  |
|      | ASF   | -.67377* | .099796 | .000  | -1.06492 | -.28262 |
|      | Ctrl  | .02777   | .099796 | 1.000 | -.36338  | .41892  |
|      | Dre   | -.17730  | .099796 | 1.000 | -.56845  | .21385  |
|      | FET   | -.30903  | .099796 | .443  | -.70018  | .08212  |
|      | G1    | -.08667  | .099796 | 1.000 | -.47782  | .30448  |
|      | Gac   | -.19513  | .099796 | 1.000 | -.58628  | .19602  |
|      | Gga   | .04623   | .099796 | 1.000 | -.34492  | .43738  |
|      | Rno   | -.11443  | .099796 | 1.000 | -.50558  | .27672  |
|      | ST2   | -.62563* | .099796 | .000  | -1.01678 | -.23448 |
|      | ST3A1 | -.07917  | .099796 | 1.000 | -.47032  | .31198  |
|      | ST3A2 | -.21767  | .099796 | 1.000 | -.60882  | .17348  |
|      | ST3H6 | -.17210  | .099796 | 1.000 | -.56325  | .21905  |
|      | Tru   | -.24440  | .099796 | 1.000 | -.63555  | .14675  |
| Ctrl | A5    | -.08533  | .099796 | 1.000 | -.47648  | .30582  |
|      | ASF   | -.70153* | .099796 | .000  | -1.09268 | -.31038 |
|      | B1    | -.02777  | .099796 | 1.000 | -.41892  | .36338  |
|      | Dre   | -.20507  | .099796 | 1.000 | -.59622  | .18608  |
|      | FET   | -.33680  | .099796 | .216  | -.72795  | .05435  |
|      | G1    | -.11443  | .099796 | 1.000 | -.50558  | .27672  |
|      | Gac   | -.22290  | .099796 | 1.000 | -.61405  | .16825  |
|      | Gga   | .01847   | .099796 | 1.000 | -.37268  | .40962  |
|      | Rno   | -.14220  | .099796 | 1.000 | -.53335  | .24895  |
|      | ST2   | -.65340* | .099796 | .000  | -1.04455 | -.26225 |
|      | ST3A1 | -.10693  | .099796 | 1.000 | -.49808  | .28422  |
|      | ST3A2 | -.24543  | .099796 | 1.000 | -.63658  | .14572  |
|      | ST3H6 | -.19987  | .099796 | 1.000 | -.59102  | .19128  |
|      | Tru   | -.27217  | .099796 | 1.000 | -.66332  | .11898  |
| Dre  | A5    | .11973   | .099796 | 1.000 | -.27142  | .51088  |
|      | ASF   | -.49647* | .099796 | .003  | -.88762  | -.10532 |
|      | B1    | .17730   | .099796 | 1.000 | -.21385  | .56845  |
|      | Ctrl  | .20507   | .099796 | 1.000 | -.18608  | .59622  |
|      | FET   | -.13173  | .099796 | 1.000 | -.52288  | .25942  |
|      | G1    | .09063   | .099796 | 1.000 | -.30052  | .48178  |
|      | Gac   | -.01783  | .099796 | 1.000 | -.40898  | .37332  |
|      | Gga   | .22353   | .099796 | 1.000 | -.16762  | .61468  |
|      | Rno   | .06287   | .099796 | 1.000 | -.32828  | .45402  |
|      | ST2   | -.44833* | .099796 | .010  | -.83948  | -.05718 |

|     |       |          |         |       |         |         |
|-----|-------|----------|---------|-------|---------|---------|
|     | ST3A1 | .09813   | .099796 | 1.000 | -.29302 | .48928  |
|     | ST3A2 | -.04037  | .099796 | 1.000 | -.43152 | .35078  |
|     | ST3H6 | .00520   | .099796 | 1.000 | -.38595 | .39635  |
|     | Tru   | -.06710  | .099796 | 1.000 | -.45825 | .32405  |
| FET | A5    | .25147   | .099796 | 1.000 | -.13968 | .64262  |
|     | ASF   | -.36473  | .099796 | .103  | -.75588 | .02642  |
|     | B1    | .30903   | .099796 | .443  | -.08212 | .70018  |
|     | Ctrl  | .33680   | .099796 | .216  | -.05435 | .72795  |
|     | Dre   | .13173   | .099796 | 1.000 | -.25942 | .52288  |
|     | G1    | .22237   | .099796 | 1.000 | -.16878 | .61352  |
|     | Gac   | .11390   | .099796 | 1.000 | -.27725 | .50505  |
|     | Gga   | .35527   | .099796 | .132  | -.03588 | .74642  |
|     | Rno   | .19460   | .099796 | 1.000 | -.19655 | .58575  |
|     | ST2   | -.31660  | .099796 | .365  | -.70775 | .07455  |
|     | ST3A1 | .22987   | .099796 | 1.000 | -.16128 | .62102  |
|     | ST3A2 | .09137   | .099796 | 1.000 | -.29978 | .48252  |
|     | ST3H6 | .13693   | .099796 | 1.000 | -.25422 | .52808  |
|     | Tru   | .06463   | .099796 | 1.000 | -.32652 | .45578  |
| G1  | A5    | .02910   | .099796 | 1.000 | -.36205 | .42025  |
|     | ASF   | -.58710* | .099796 | .000  | -.97825 | -.19595 |
|     | B1    | .08667   | .099796 | 1.000 | -.30448 | .47782  |
|     | Ctrl  | .11443   | .099796 | 1.000 | -.27672 | .50558  |
|     | Dre   | -.09063  | .099796 | 1.000 | -.48178 | .30052  |
|     | FET   | -.22237  | .099796 | 1.000 | -.61352 | .16878  |
|     | Gac   | -.10847  | .099796 | 1.000 | -.49962 | .28268  |
|     | Gga   | .13290   | .099796 | 1.000 | -.25825 | .52405  |
|     | Rno   | -.02777  | .099796 | 1.000 | -.41892 | .36338  |
|     | ST2   | -.53897* | .099796 | .001  | -.93012 | -.14782 |
|     | ST3A1 | .00750   | .099796 | 1.000 | -.38365 | .39865  |
|     | ST3A2 | -.13100  | .099796 | 1.000 | -.52215 | .26015  |
|     | ST3H6 | -.08543  | .099796 | 1.000 | -.47658 | .30572  |
|     | Tru   | -.15773  | .099796 | 1.000 | -.54888 | .23342  |
| Gac | A5    | .13757   | .099796 | 1.000 | -.25358 | .52872  |
|     | ASF   | -.47863* | .099796 | .004  | -.86978 | -.08748 |
|     | B1    | .19513   | .099796 | 1.000 | -.19602 | .58628  |
|     | Ctrl  | .22290   | .099796 | 1.000 | -.16825 | .61405  |
|     | Dre   | .01783   | .099796 | 1.000 | -.37332 | .40898  |
|     | FET   | -.11390  | .099796 | 1.000 | -.50505 | .27725  |
|     | G1    | .10847   | .099796 | 1.000 | -.28268 | .49962  |
|     | Gga   | .24137   | .099796 | 1.000 | -.14978 | .63252  |
|     | Rno   | .08070   | .099796 | 1.000 | -.31045 | .47185  |

|     |       |          |         |       |          |         |
|-----|-------|----------|---------|-------|----------|---------|
|     | ST2   | -.43050* | .099796 | .017  | -.82165  | -.03935 |
|     | ST3A1 | .11597   | .099796 | 1.000 | -.27518  | .50712  |
|     | ST3A2 | -.02253  | .099796 | 1.000 | -.41368  | .36862  |
|     | ST3H6 | .02303   | .099796 | 1.000 | -.36812  | .41418  |
|     | Tru   | -.04927  | .099796 | 1.000 | -.44042  | .34188  |
| Gga | A5    | -.10380  | .099796 | 1.000 | -.49495  | .28735  |
|     | ASF   | -.72000* | .099796 | .000  | -1.11115 | -.32885 |
|     | B1    | -.04623  | .099796 | 1.000 | -.43738  | .34492  |
|     | Ctrl  | -.01847  | .099796 | 1.000 | -.40962  | .37268  |
|     | Dre   | -.22353  | .099796 | 1.000 | -.61468  | .16762  |
|     | FET   | -.35527  | .099796 | .132  | -.74642  | .03588  |
|     | G1    | -.13290  | .099796 | 1.000 | -.52405  | .25825  |
|     | Gac   | -.24137  | .099796 | 1.000 | -.63252  | .14978  |
|     | Rno   | -.16067  | .099796 | 1.000 | -.55182  | .23048  |
|     | ST2   | -.67187* | .099796 | .000  | -1.06302 | -.28072 |
|     | ST3A1 | -.12540  | .099796 | 1.000 | -.51655  | .26575  |
|     | ST3A2 | -.26390  | .099796 | 1.000 | -.65505  | .12725  |
|     | ST3H6 | -.21833  | .099796 | 1.000 | -.60948  | .17282  |
|     | Tru   | -.29063  | .099796 | .705  | -.68178  | .10052  |
| Rno | A5    | .05687   | .099796 | 1.000 | -.33428  | .44802  |
|     | ASF   | -.55933* | .099796 | .000  | -.95048  | -.16818 |
|     | B1    | .11443   | .099796 | 1.000 | -.27672  | .50558  |
|     | Ctrl  | .14220   | .099796 | 1.000 | -.24895  | .53335  |
|     | Dre   | -.06287  | .099796 | 1.000 | -.45402  | .32828  |
|     | FET   | -.19460  | .099796 | 1.000 | -.58575  | .19655  |
|     | G1    | .02777   | .099796 | 1.000 | -.36338  | .41892  |
|     | Gac   | -.08070  | .099796 | 1.000 | -.47185  | .31045  |
|     | Gga   | .16067   | .099796 | 1.000 | -.23048  | .55182  |
|     | ST2   | -.51120* | .099796 | .002  | -.90235  | -.12005 |
|     | ST3A1 | .03527   | .099796 | 1.000 | -.35588  | .42642  |
|     | ST3A2 | -.10323  | .099796 | 1.000 | -.49438  | .28792  |
|     | ST3H6 | -.05767  | .099796 | 1.000 | -.44882  | .33348  |
|     | Tru   | -.12997  | .099796 | 1.000 | -.52112  | .26118  |
| ST2 | A5    | .56807*  | .099796 | .000  | .17692   | .95922  |
|     | ASF   | -.04813  | .099796 | 1.000 | -.43928  | .34302  |
|     | B1    | .62563*  | .099796 | .000  | .23448   | 1.01678 |
|     | Ctrl  | .65340*  | .099796 | .000  | .26225   | 1.04455 |
|     | Dre   | .44833*  | .099796 | .010  | .05718   | .83948  |
|     | FET   | .31660   | .099796 | .365  | -.07455  | .70775  |
|     | G1    | .53897*  | .099796 | .001  | .14782   | .93012  |
|     | Gac   | .43050*  | .099796 | .017  | .03935   | .82165  |

|       |       |          |         |       |         |         |
|-------|-------|----------|---------|-------|---------|---------|
|       | Gga   | .67187*  | .099796 | .000  | .28072  | 1.06302 |
|       | Rno   | .51120*  | .099796 | .002  | .12005  | .90235  |
|       | ST3A1 | .54647*  | .099796 | .001  | .15532  | .93762  |
|       | ST3A2 | .40797*  | .099796 | .031  | .01682  | .79912  |
|       | ST3H6 | .45353*  | .099796 | .009  | .06238  | .84468  |
|       | Tru   | .38123   | .099796 | .066  | -.00992 | .77238  |
| ST3A1 | A5    | .02160   | .099796 | 1.000 | -.36955 | .41275  |
|       | ASF   | -.59460* | .099796 | .000  | -.98575 | -.20345 |
|       | B1    | .07917   | .099796 | 1.000 | -.31198 | .47032  |
|       | Ctrl  | .10693   | .099796 | 1.000 | -.28422 | .49808  |
|       | Dre   | -.09813  | .099796 | 1.000 | -.48928 | .29302  |
|       | FET   | -.22987  | .099796 | 1.000 | -.62102 | .16128  |
|       | G1    | -.00750  | .099796 | 1.000 | -.39865 | .38365  |
|       | Gac   | -.11597  | .099796 | 1.000 | -.50712 | .27518  |
|       | Gga   | .12540   | .099796 | 1.000 | -.26575 | .51655  |
|       | Rno   | -.03527  | .099796 | 1.000 | -.42642 | .35588  |
|       | ST2   | -.54647* | .099796 | .001  | -.93762 | -.15532 |
|       | ST3A2 | -.13850  | .099796 | 1.000 | -.52965 | .25265  |
|       | ST3H6 | -.09293  | .099796 | 1.000 | -.48408 | .29822  |
|       | Tru   | -.16523  | .099796 | 1.000 | -.55638 | .22592  |
| ST3A2 | A5    | .16010   | .099796 | 1.000 | -.23105 | .55125  |
|       | ASF   | -.45610* | .099796 | .008  | -.84725 | -.06495 |
|       | B1    | .21767   | .099796 | 1.000 | -.17348 | .60882  |
|       | Ctrl  | .24543   | .099796 | 1.000 | -.14572 | .63658  |
|       | Dre   | .04037   | .099796 | 1.000 | -.35078 | .43152  |
|       | FET   | -.09137  | .099796 | 1.000 | -.48252 | .29978  |
|       | G1    | .13100   | .099796 | 1.000 | -.26015 | .52215  |
|       | Gac   | .02253   | .099796 | 1.000 | -.36862 | .41368  |
|       | Gga   | .26390   | .099796 | 1.000 | -.12725 | .65505  |
|       | Rno   | .10323   | .099796 | 1.000 | -.28792 | .49438  |
|       | ST2   | -.40797* | .099796 | .031  | -.79912 | -.01682 |
|       | ST3A1 | .13850   | .099796 | 1.000 | -.25265 | .52965  |
|       | ST3H6 | .04557   | .099796 | 1.000 | -.34558 | .43672  |
|       | Tru   | -.02673  | .099796 | 1.000 | -.41788 | .36442  |
| ST3H6 | A5    | .11453   | .099796 | 1.000 | -.27662 | .50568  |
|       | ASF   | -.50167* | .099796 | .002  | -.89282 | -.11052 |
|       | B1    | .17210   | .099796 | 1.000 | -.21905 | .56325  |
|       | Ctrl  | .19987   | .099796 | 1.000 | -.19128 | .59102  |
|       | Dre   | -.00520  | .099796 | 1.000 | -.39635 | .38595  |
|       | FET   | -.13693  | .099796 | 1.000 | -.52808 | .25422  |
|       | G1    | .08543   | .099796 | 1.000 | -.30572 | .47658  |

|     |       |          |         |       |         |         |
|-----|-------|----------|---------|-------|---------|---------|
|     | Gac   | -.02303  | .099796 | 1.000 | -.41418 | .36812  |
|     | Gga   | .21833   | .099796 | 1.000 | -.17282 | .60948  |
|     | Rno   | .05767   | .099796 | 1.000 | -.33348 | .44882  |
|     | ST2   | -.45353* | .099796 | .009  | -.84468 | -.06238 |
|     | ST3A1 | .09293   | .099796 | 1.000 | -.29822 | .48408  |
|     | ST3A2 | -.04557  | .099796 | 1.000 | -.43672 | .34558  |
|     | Tru   | -.07230  | .099796 | 1.000 | -.46345 | .31885  |
| Tru | A5    | .18683   | .099796 | 1.000 | -.20432 | .57798  |
|     | ASF   | -.42937* | .099796 | .017  | -.82052 | -.03822 |
|     | B1    | .24440   | .099796 | 1.000 | -.14675 | .63555  |
|     | Ctrl  | .27217   | .099796 | 1.000 | -.11898 | .66332  |
|     | Dre   | .06710   | .099796 | 1.000 | -.32405 | .45825  |
|     | FET   | -.06463  | .099796 | 1.000 | -.45578 | .32652  |
|     | G1    | .15773   | .099796 | 1.000 | -.23342 | .54888  |
|     | Gac   | .04927   | .099796 | 1.000 | -.34188 | .44042  |
|     | Gga   | .29063   | .099796 | .705  | -.10052 | .68178  |
|     | Rno   | .12997   | .099796 | 1.000 | -.26118 | .52112  |
|     | ST2   | -.38123  | .099796 | .066  | -.77238 | .00992  |
|     | ST3A1 | .16523   | .099796 | 1.000 | -.22592 | .55638  |
|     | ST3A2 | .02673   | .099796 | 1.000 | -.36442 | .41788  |
|     | ST3H6 | .07230   | .099796 | 1.000 | -.31885 | .46345  |

Based on observed means.

The error term is Mean Square(Error) = .015.

\*. The mean difference is significant at the .05 level.

## Profile Plots



**Estimated Marginal Means of RCA-I**

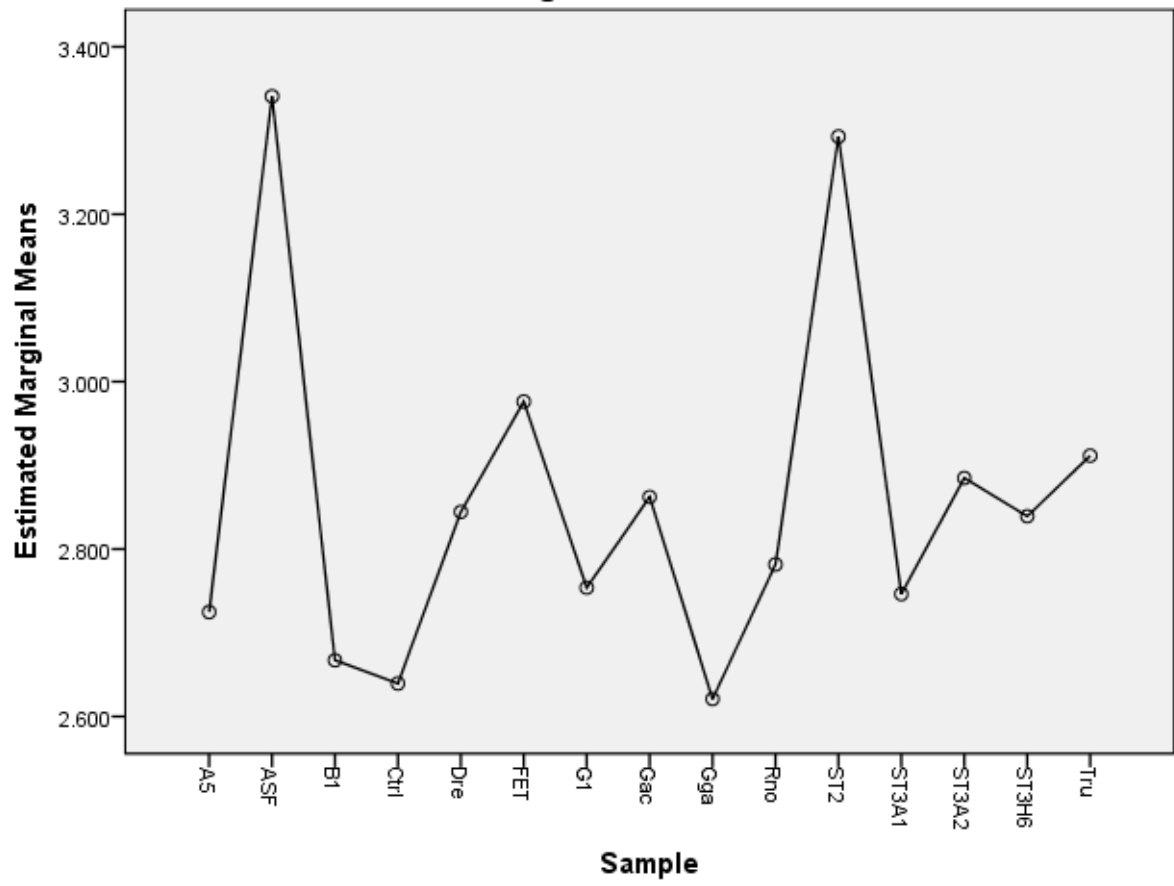

Supplement: Fig6_RawDataSet2.pdf [file Fig6_RawDataSet2.pdf]
