# Supplementary material for: Engineering of CHO cells for the production of vertebrate recombinant sialyltransferases
Source: PeerJ journal article supplement (doi:10.7717/peerj.5788), 2019-02-11
Supplement: Fig3_RawDataSet3.pdf [file Fig3_RawDataSet3.pdf]

### **Figure 3: Statistics**

```
GET
  FILE='\\gweng.gmadtree.gmit.ie\STAFF\Benoit.Houeix\Documents\ST.sav'.
DATASET NAME DataSet1 WINDOW=FRONT.
T-TEST GROUPS=Sample('A5' 'Ctrl')
  /MISSING=ANALYSIS
  /VARIABLES=Activity
  /CRITERIA=CI(.95).
```

### **Legend to Figure 3 Raw Data Set 3**

| Label for Statistics | Corresponding in Manuscript           |
|----------------------|---------------------------------------|
| A5                   | hST6 A5                               |
| B1                   | hST6 B1                               |
| G1                   | hST6                                  |
| Dre                  | zST6                                  |
| Gac                  | sST6                                  |
| Tru                  | fST6                                  |
| Gga                  | cST6                                  |
| Rno                  | rST6                                  |
| Ctrl                 | mST6 (commercial mouse enzyme)        |
| ST3A2                | hST3 A2                               |
| ST3A1                | hST3 A2                               |
| ST3H6                | zST3                                  |
| ST2                  | hST6Gal2                              |
| Neg                  | Neg (IMAC-purified PSA <sup>1</sup> ) |

<sup>1</sup>PSA: Prostate Specific Antigen (no sialyltransferase activity)

### **T-Test**

**Note: These means are pmol/well, NOT pmol/min/μg protein as presented in Figure 3.**

#### **Notes**

|                |                                                               |
|----------------|---------------------------------------------------------------|
| Output Created | 12-JUL-2018 10:15:41                                          |
| Comments       |                                                               |
| Input          | Data                                                          |
|                | \\gweng.gmadtree.gmit.ie\STAFF\Benoit.Houeix\Documents\ST.sav |
|                | Active Dataset                                                |
|                | DataSet1                                                      |
|                | Filter                                                        |
|                | <none>                                                        |

|                        |                                |                                                                                                                            |             |
|------------------------|--------------------------------|----------------------------------------------------------------------------------------------------------------------------|-------------|
|                        | Weight                         | <none>                                                                                                                     |             |
|                        | Split File                     | <none>                                                                                                                     |             |
|                        | N of Rows in Working Data File |                                                                                                                            | 48          |
| Missing Value Handling | Definition of Missing          | User defined missing values are treated as missing.                                                                        |             |
|                        | Cases Used                     | Statistics for each analysis are based on the cases with no missing or out-of-range data for any variable in the analysis. |             |
| Syntax                 |                                | T-TEST GROUPS=Sample('A5' 'Ctrl')<br>/MISSING=ANALYSIS<br>/VARIABLES=Activity<br>/CRITERIA=CI(.95).                        |             |
| Resources              | Processor Time                 |                                                                                                                            | 00:00:00.00 |
|                        | Elapsed Time                   |                                                                                                                            | 00:00:00.00 |

[DataSet1] \\gweng.gmadtree.gmit.ie\STAFF\Benoit.Houeix\Documents\ST.sav

#### Group Statistics

| Sample      | N | Mean      | Std. Deviation | Std. Error Mean |
|-------------|---|-----------|----------------|-----------------|
| Activity A5 | 3 | 2197.3667 | 312.12468      | 180.20527       |
| Ctrl        | 3 | 2451.6167 | 455.31970      | 262.87895       |

#### Independent Samples Test

|          |                             | Levene's Test for Equality of Variances |      | t-test for Equality of Means |       |
|----------|-----------------------------|-----------------------------------------|------|------------------------------|-------|
|          |                             | F                                       | Sig. | t                            | df    |
| Activity | Equal variances assumed     | .570                                    | .492 | -.798                        | 4     |
|          | Equal variances not assumed |                                         |      | -.798                        | 3.540 |

#### Independent Samples Test

|  |                              |
|--|------------------------------|
|  | t-test for Equality of Means |
|--|------------------------------|

|          |                             | Sig. (2-tailed) | Mean Difference | Std. Error Difference | 95% Confidence Interval of the Difference |
|----------|-----------------------------|-----------------|-----------------|-----------------------|-------------------------------------------|
|          |                             |                 |                 |                       | Lower                                     |
| Activity | Equal variances assumed     | .470            | -254.25000      | 318.71505             | -1139.14484                               |
|          | Equal variances not assumed | .475            | -254.25000      | 318.71505             | -1186.43005                               |

#### Independent Samples Test

|          |                             | t-test for Equality of Means              |
|----------|-----------------------------|-------------------------------------------|
|          |                             | 95% Confidence Interval of the Difference |
|          |                             | Upper                                     |
| Activity | Equal variances assumed     | 630.64484                                 |
|          | Equal variances not assumed | 677.93005                                 |

```
T-TEST GROUPS=Sample('B1' 'Ctrl')
/MISSING=ANALYSIS
/VARIABLES=Activity
/CRITERIA=CI(.95).
```

## T-Test

### Notes

|                        |                                |                                                               |
|------------------------|--------------------------------|---------------------------------------------------------------|
| Output Created         | 12-JUL-2018 10:17:22           |                                                               |
| Comments               |                                |                                                               |
| Input                  | Data                           | \\gweng.gmadtree.gmit.ie\STAFF\Benoit.Houeix\Documents\ST.sav |
|                        | Active Dataset                 | DataSet1                                                      |
|                        | Filter                         | <none>                                                        |
|                        | Weight                         | <none>                                                        |
|                        | Split File                     | <none>                                                        |
|                        | N of Rows in Working Data File | 48                                                            |
| Missing Value Handling | Definition of Missing          | User defined missing values are treated as missing.           |

|           |                |                                                                                                                            |
|-----------|----------------|----------------------------------------------------------------------------------------------------------------------------|
|           | Cases Used     | Statistics for each analysis are based on the cases with no missing or out-of-range data for any variable in the analysis. |
| Syntax    |                | T-TEST GROUPS=Sample('B1' 'Ctrl')<br>/MISSING=ANALYSIS<br>/VARIABLES=Activity<br>/CRITERIA=CI(.95).                        |
| Resources | Processor Time | 00:00:00.00                                                                                                                |
|           | Elapsed Time   | 00:00:00.00                                                                                                                |

**Group Statistics**

| Sample      | N | Mean      | Std. Deviation | Std. Error Mean |
|-------------|---|-----------|----------------|-----------------|
| Activity B1 | 3 | 2440.0533 | 584.34650      | 337.37261       |
| Ctrl        | 3 | 2451.6167 | 455.31970      | 262.87895       |

**Independent Samples Test**

|          |                             | Levene's Test for Equality of Variances |      | t-test for Equality of Means |       |
|----------|-----------------------------|-----------------------------------------|------|------------------------------|-------|
|          |                             | F                                       | Sig. | t                            | df    |
| Activity | Equal variances assumed     | .098                                    | .769 | -.027                        | 4     |
|          | Equal variances not assumed |                                         |      | -.027                        | 3.774 |

**Independent Samples Test**

|          |                             | t-test for Equality of Means |                 |                       |                                           |
|----------|-----------------------------|------------------------------|-----------------|-----------------------|-------------------------------------------|
|          |                             | Sig. (2-tailed)              | Mean Difference | Std. Error Difference | 95% Confidence Interval of the Difference |
|          |                             |                              |                 |                       | Lower                                     |
| Activity | Equal variances assumed     | .980                         | -11.56333       | 427.69805             | -1199.04349                               |
|          | Equal variances not assumed | .980                         | -11.56333       | 427.69805             | -1227.55702                               |

**Independent Samples Test**

|  |                              |
|--|------------------------------|
|  | t-test for Equality of Means |
|--|------------------------------|

|          |                             |                                           |
|----------|-----------------------------|-------------------------------------------|
|          |                             | 95% Confidence Interval of the Difference |
|          |                             | Upper                                     |
| Activity | Equal variances assumed     | 1175.91682                                |
|          | Equal variances not assumed | 1204.43036                                |

```
T-TEST GROUPS=Sample('G1' 'Ctrl')
/MISSING=ANALYSIS
/VARIABLES=Activity
/CRITERIA=CI(.95).
```

## T-Test

### Notes

|                        |                                                                                                     |                                                                                                                            |
|------------------------|-----------------------------------------------------------------------------------------------------|----------------------------------------------------------------------------------------------------------------------------|
| Output Created         | 12-JUL-2018 10:19:44                                                                                |                                                                                                                            |
| Comments               |                                                                                                     |                                                                                                                            |
| Input                  | Data                                                                                                | \\gweng.gmadtree.gmit.ie\STAFF\Benoit.Houeix\Documents\ST.sav                                                              |
|                        | Active Dataset                                                                                      | DataSet1                                                                                                                   |
|                        | Filter                                                                                              | <none>                                                                                                                     |
|                        | Weight                                                                                              | <none>                                                                                                                     |
|                        | Split File                                                                                          | <none>                                                                                                                     |
|                        | N of Rows in Working Data File                                                                      | 48                                                                                                                         |
| Missing Value Handling | Definition of Missing                                                                               | User defined missing values are treated as missing.                                                                        |
|                        | Cases Used                                                                                          | Statistics for each analysis are based on the cases with no missing or out-of-range data for any variable in the analysis. |
| Syntax                 | T-TEST GROUPS=Sample('G1' 'Ctrl')<br>/MISSING=ANALYSIS<br>/VARIABLES=Activity<br>/CRITERIA=CI(.95). |                                                                                                                            |
| Resources              | Processor Time                                                                                      | 00:00:00.00                                                                                                                |
|                        | Elapsed Time                                                                                        | 00:00:00.02                                                                                                                |

### Group Statistics

|          | Sample | N | Mean      | Std. Deviation | Std. Error Mean |
|----------|--------|---|-----------|----------------|-----------------|
| Activity | G1     | 3 | 2620.6967 | 345.92251      | 199.71846       |
|          | Ctrl   | 3 | 2451.6167 | 455.31970      | 262.87895       |

**Independent Samples Test**

|          |                             | Levene's Test for Equality of Variances |      | t-test for Equality of Means |       |
|----------|-----------------------------|-----------------------------------------|------|------------------------------|-------|
|          |                             | F                                       | Sig. | t                            | df    |
| Activity | Equal variances assumed     | .288                                    | .620 | .512                         | 4     |
|          | Equal variances not assumed |                                         |      | .512                         | 3.732 |

**Independent Samples Test**

|          |                             | t-test for Equality of Means |                 |                       |                                           |
|----------|-----------------------------|------------------------------|-----------------|-----------------------|-------------------------------------------|
|          |                             | Sig. (2-tailed)              | Mean Difference | Std. Error Difference | 95% Confidence Interval of the Difference |
|          |                             |                              |                 |                       | Lower                                     |
| Activity | Equal variances assumed     | .636                         | 169.08000       | 330.14058             | -747.53721                                |
|          | Equal variances not assumed | .637                         | 169.08000       | 330.14058             | -774.10883                                |

**Independent Samples Test**

|          |                             | t-test for Equality of Means              |  |
|----------|-----------------------------|-------------------------------------------|--|
|          |                             | 95% Confidence Interval of the Difference |  |
|          |                             | Upper                                     |  |
| Activity | Equal variances assumed     | 1085.69721                                |  |
|          | Equal variances not assumed | 1112.26883                                |  |

```
T-TEST GROUPS=Sample('Dre' 'Ctrl')
/MISSING=ANALYSIS
/VARIABLES=Activity
/CRITERIA=CI(.95).
```

**T-Test**

**Notes**

|                |                      |                                                               |
|----------------|----------------------|---------------------------------------------------------------|
| Output Created | 12-JUL-2018 10:20:10 |                                                               |
| Comments       |                      |                                                               |
| Input          | Data                 | \\gweng.gmadtree.gmit.ie\STAFF\Benoit.Houeix\Documents\ST.sav |
|                | Active Dataset       | DataSet1                                                      |
|                | Filter               | <none>                                                        |
|                | Weight               | <none>                                                        |

|                        |                                |                                                                                                                            |             |
|------------------------|--------------------------------|----------------------------------------------------------------------------------------------------------------------------|-------------|
|                        | Split File                     | <none>                                                                                                                     |             |
|                        | N of Rows in Working Data File |                                                                                                                            | 48          |
| Missing Value Handling | Definition of Missing          | User defined missing values are treated as missing.                                                                        |             |
|                        | Cases Used                     | Statistics for each analysis are based on the cases with no missing or out-of-range data for any variable in the analysis. |             |
| Syntax                 |                                | T-TEST GROUPS=Sample('Dre' 'Ctrl')<br>/MISSING=ANALYSIS<br>/VARIABLES=Activity<br>/CRITERIA=CI(.95).                       |             |
| Resources              | Processor Time                 |                                                                                                                            | 00:00:00.03 |
|                        | Elapsed Time                   |                                                                                                                            | 00:00:00.02 |

#### Group Statistics

|          | Sample | N | Mean      | Std. Deviation | Std. Error Mean |
|----------|--------|---|-----------|----------------|-----------------|
| Activity | Dre    | 3 | 2660.1367 | 397.39347      | 229.43523       |
|          | Ctrl   | 3 | 2451.6167 | 455.31970      | 262.87895       |

#### Independent Samples Test

|          |                             | Levene's Test for Equality of Variances |      | t-test for Equality of Means |       |
|----------|-----------------------------|-----------------------------------------|------|------------------------------|-------|
|          |                             | F                                       | Sig. | t                            | df    |
| Activity | Equal variances assumed     | .065                                    | .811 | .598                         | 4     |
|          | Equal variances not assumed |                                         |      | .598                         | 3.928 |

#### Independent Samples Test

|          |                             | t-test for Equality of Means |                 |                       |                                           |
|----------|-----------------------------|------------------------------|-----------------|-----------------------|-------------------------------------------|
|          |                             | Sig. (2-tailed)              | Mean Difference | Std. Error Difference | 95% Confidence Interval of the Difference |
|          |                             |                              |                 |                       | Lower                                     |
| Activity | Equal variances assumed     | .582                         | 208.52000       | 348.92100             | -760.24002                                |
|          | Equal variances not assumed | .583                         | 208.52000       | 348.92100             | -767.26792                                |

#### Independent Samples Test

|          |                             |                                           |
|----------|-----------------------------|-------------------------------------------|
|          |                             | t-test for Equality of Means              |
|          |                             | 95% Confidence Interval of the Difference |
|          |                             | Upper                                     |
| Activity | Equal variances assumed     | 1177.28002                                |
|          | Equal variances not assumed | 1184.30792                                |

```
T-TEST GROUPS=Sample('Gac' 'Ctrl')
/MISSING=ANALYSIS
/VARIABLES=Activity
/CRITERIA=CI(.95).
```

## T-Test

### Notes

|                        |                                                                                                      |                                                                                                                            |
|------------------------|------------------------------------------------------------------------------------------------------|----------------------------------------------------------------------------------------------------------------------------|
| Output Created         | 12-JUL-2018 10:20:28                                                                                 |                                                                                                                            |
| Comments               |                                                                                                      |                                                                                                                            |
| Input                  | Data                                                                                                 | \\gweng.gmadtree.gmit.ie\STAFF\Benoit.Houeix\Documents\ST.sav                                                              |
|                        | Active Dataset                                                                                       | DataSet1                                                                                                                   |
|                        | Filter                                                                                               | <none>                                                                                                                     |
|                        | Weight                                                                                               | <none>                                                                                                                     |
|                        | Split File                                                                                           | <none>                                                                                                                     |
|                        | N of Rows in Working Data File                                                                       | 48                                                                                                                         |
| Missing Value Handling | Definition of Missing                                                                                | User defined missing values are treated as missing.                                                                        |
|                        | Cases Used                                                                                           | Statistics for each analysis are based on the cases with no missing or out-of-range data for any variable in the analysis. |
| Syntax                 | T-TEST GROUPS=Sample('Gac' 'Ctrl')<br>/MISSING=ANALYSIS<br>/VARIABLES=Activity<br>/CRITERIA=CI(.95). |                                                                                                                            |
| Resources              | Processor Time                                                                                       | 00:00:00.00                                                                                                                |
|                        | Elapsed Time                                                                                         | 00:00:00.02                                                                                                                |

### Group Statistics

|          | Sample | N | Mean      | Std. Deviation | Std. Error Mean |
|----------|--------|---|-----------|----------------|-----------------|
| Activity | Gac    | 3 | 3065.8800 | 432.52984      | 249.72122       |
|          | Ctrl   | 3 | 2451.6167 | 455.31970      | 262.87895       |

**Independent Samples Test**

|          |                             | Levene's Test for Equality of Variances |      | t-test for Equality of Means |       |
|----------|-----------------------------|-----------------------------------------|------|------------------------------|-------|
|          |                             | F                                       | Sig. | t                            | df    |
| Activity | Equal variances assumed     | .001                                    | .982 | 1.694                        | 4     |
|          | Equal variances not assumed |                                         |      | 1.694                        | 3.989 |

**Independent Samples Test**

|          |                             | t-test for Equality of Means |                 |                       |                                           |
|----------|-----------------------------|------------------------------|-----------------|-----------------------|-------------------------------------------|
|          |                             | Sig. (2-tailed)              | Mean Difference | Std. Error Difference | 95% Confidence Interval of the Difference |
| Lower    |                             |                              |                 |                       |                                           |
| Activity | Equal variances assumed     | .165                         | 614.26333       | 362.58245             | -392.42693                                |
|          | Equal variances not assumed | .166                         | 614.26333       | 362.58245             | -393.47276                                |

**Independent Samples Test**

|          |                             | t-test for Equality of Means              |  |
|----------|-----------------------------|-------------------------------------------|--|
|          |                             | 95% Confidence Interval of the Difference |  |
|          |                             | Upper                                     |  |
| Activity | Equal variances assumed     | 1620.95360                                |  |
|          | Equal variances not assumed | 1621.99943                                |  |

```
T-TEST GROUPS=Sample('Tru' 'Ctrl')
/MISSING=ANALYSIS
/VARIABLES=Activity
/CRITERIA=CI(.95).
```

**T-Test**

**Notes**

|                |                      |                                                               |
|----------------|----------------------|---------------------------------------------------------------|
| Output Created | 12-JUL-2018 10:20:41 |                                                               |
| Comments       |                      |                                                               |
| Input          | Data                 | \\gweng.gmadtree.gmit.ie\STAFF\Benoit.Houeix\Documents\ST.sav |
|                | Active Dataset       | DataSet1                                                      |
|                | Filter               | <none>                                                        |
|                | Weight               | <none>                                                        |
|                | Split File           | <none>                                                        |

|                        |                                |                                                                                                                            |
|------------------------|--------------------------------|----------------------------------------------------------------------------------------------------------------------------|
|                        | N of Rows in Working Data File | 48                                                                                                                         |
| Missing Value Handling | Definition of Missing          | User defined missing values are treated as missing.                                                                        |
|                        | Cases Used                     | Statistics for each analysis are based on the cases with no missing or out-of-range data for any variable in the analysis. |
| Syntax                 |                                | T-TEST GROUPS=Sample('Tru' 'Ctrl')<br>/MISSING=ANALYSIS<br>/VARIABLES=Activity<br>/CRITERIA=CI(.95).                       |
| Resources              | Processor Time                 | 00:00:00.00                                                                                                                |
|                        | Elapsed Time                   | 00:00:00.02                                                                                                                |

#### Group Statistics

| Sample       | N | Mean      | Std. Deviation | Std. Error Mean |
|--------------|---|-----------|----------------|-----------------|
| Activity Tru | 3 | 3247.6667 | 434.25077      | 250.71480       |
| Ctrl         | 3 | 2451.6167 | 455.31970      | 262.87895       |

#### Independent Samples Test

|          |                             | Levene's Test for Equality of Variances |      | t-test for Equality of Means |       |
|----------|-----------------------------|-----------------------------------------|------|------------------------------|-------|
|          |                             | F                                       | Sig. | t                            | df    |
| Activity | Equal variances assumed     | .001                                    | .978 | 2.191                        | 4     |
|          | Equal variances not assumed |                                         |      | 2.191                        | 3.991 |

#### Independent Samples Test

|          |                             | t-test for Equality of Means |                 |                       |                                           |
|----------|-----------------------------|------------------------------|-----------------|-----------------------|-------------------------------------------|
|          |                             | Sig. (2-tailed)              | Mean Difference | Std. Error Difference | 95% Confidence Interval of the Difference |
|          |                             |                              |                 |                       | Lower                                     |
| Activity | Equal variances assumed     | .094                         | 796.05000       | 363.26747             | -212.54218                                |
|          | Equal variances not assumed | .094                         | 796.05000       | 363.26747             | -213.43432                                |

#### Independent Samples Test

|  |                              |
|--|------------------------------|
|  | t-test for Equality of Means |
|--|------------------------------|

|          |                             |                                           |
|----------|-----------------------------|-------------------------------------------|
|          |                             | 95% Confidence Interval of the Difference |
|          |                             | Upper                                     |
| Activity | Equal variances assumed     | 1804.64218                                |
|          | Equal variances not assumed | 1805.53432                                |

```
T-TEST GROUPS=Sample('Gga' 'Ctrl')
/MISSING=ANALYSIS
/VARIABLES=Activity
/CRITERIA=CI(.95).
```

## T-Test

### Notes

|                        |                                                                                                      |                                                                                                                            |
|------------------------|------------------------------------------------------------------------------------------------------|----------------------------------------------------------------------------------------------------------------------------|
| Output Created         | 12-JUL-2018 10:20:58                                                                                 |                                                                                                                            |
| Comments               |                                                                                                      |                                                                                                                            |
| Input                  | Data                                                                                                 | \\gweng.gmadtree.gmit.ie\STAFF\Benoit.Houeix\Documents\ST.sav                                                              |
|                        | Active Dataset                                                                                       | DataSet1                                                                                                                   |
|                        | Filter                                                                                               | <none>                                                                                                                     |
|                        | Weight                                                                                               | <none>                                                                                                                     |
|                        | Split File                                                                                           | <none>                                                                                                                     |
|                        | N of Rows in Working Data File                                                                       | 48                                                                                                                         |
| Missing Value Handling | Definition of Missing                                                                                | User defined missing values are treated as missing.                                                                        |
|                        | Cases Used                                                                                           | Statistics for each analysis are based on the cases with no missing or out-of-range data for any variable in the analysis. |
| Syntax                 | T-TEST GROUPS=Sample('Gga' 'Ctrl')<br>/MISSING=ANALYSIS<br>/VARIABLES=Activity<br>/CRITERIA=CI(.95). |                                                                                                                            |
| Resources              | Processor Time                                                                                       | 00:00:00.00                                                                                                                |
|                        | Elapsed Time                                                                                         | 00:00:00.00                                                                                                                |

### Group Statistics

|          | Sample | N | Mean      | Std. Deviation | Std. Error Mean |
|----------|--------|---|-----------|----------------|-----------------|
| Activity | Gga    | 3 | 2011.2967 | 280.50808      | 161.95141       |
|          | Ctrl   | 3 | 2451.6167 | 455.31970      | 262.87895       |

### Independent Samples Test

|          |                             | Levene's Test for Equality of Variances |      | t-test for Equality of Means |       |
|----------|-----------------------------|-----------------------------------------|------|------------------------------|-------|
|          |                             | F                                       | Sig. | t                            | df    |
| Activity | Equal variances assumed     | .936                                    | .388 | -1.426                       | 4     |
|          | Equal variances not assumed |                                         |      | -1.426                       | 3.327 |

#### Independent Samples Test

|          |                             | t-test for Equality of Means |                 |                       |                                           |
|----------|-----------------------------|------------------------------|-----------------|-----------------------|-------------------------------------------|
|          |                             | Sig. (2-tailed)              | Mean Difference | Std. Error Difference | 95% Confidence Interval of the Difference |
| Lower    |                             |                              |                 |                       |                                           |
| Activity | Equal variances assumed     | .227                         | -440.32000      | 308.76140             | -1297.57909                               |
|          | Equal variances not assumed | .241                         | -440.32000      | 308.76140             | -1370.49606                               |

#### Independent Samples Test

|          |                             | t-test for Equality of Means              |  |
|----------|-----------------------------|-------------------------------------------|--|
|          |                             | 95% Confidence Interval of the Difference |  |
|          |                             | Upper                                     |  |
| Activity | Equal variances assumed     | 416.93909                                 |  |
|          | Equal variances not assumed | 489.85606                                 |  |

```
T-TEST GROUPS=Sample('Rno' 'Ctrl')
/MISSING=ANALYSIS
/VARIABLES=Activity
/CRITERIA=CI(.95).
```

## T-Test

#### Notes

|                |                      |                                                               |
|----------------|----------------------|---------------------------------------------------------------|
| Output Created | 12-JUL-2018 10:21:16 |                                                               |
| Comments       |                      |                                                               |
| Input          | Data                 | \\gweng.gmadtree.gmit.ie\STAFF\Benoit.Houeix\Documents\ST.sav |
|                | Active Dataset       | DataSet1                                                      |
|                | Filter               | <none>                                                        |
|                | Weight               | <none>                                                        |
|                | Split File           | <none>                                                        |

|                        |                           |                                                                                                                            |
|------------------------|---------------------------|----------------------------------------------------------------------------------------------------------------------------|
|                        | N of Rows in Working Data | 48                                                                                                                         |
|                        | File                      |                                                                                                                            |
| Missing Value Handling | Definition of Missing     | User defined missing values are treated as missing.                                                                        |
|                        | Cases Used                | Statistics for each analysis are based on the cases with no missing or out-of-range data for any variable in the analysis. |
| Syntax                 |                           | T-TEST GROUPS=Sample('Rno' 'Ctrl')<br>/MISSING=ANALYSIS<br>/VARIABLES=Activity<br>/CRITERIA=CI(.95).                       |
| Resources              | Processor Time            | 00:00:00.03                                                                                                                |
|                        | Elapsed Time              | 00:00:00.02                                                                                                                |

### Group Statistics

| Sample       | N | Mean      | Std. Deviation | Std. Error Mean |
|--------------|---|-----------|----------------|-----------------|
| Activity Rno | 3 | 3126.6500 | 659.51091      | 380.76880       |
| Ctrl         | 3 | 2451.6167 | 455.31970      | 262.87895       |

### Independent Samples Test

|          |                             | Levene's Test for Equality of Variances |      | t-test for Equality of Means |       |
|----------|-----------------------------|-----------------------------------------|------|------------------------------|-------|
|          |                             | F                                       | Sig. | t                            | df    |
| Activity | Equal variances assumed     | .391                                    | .566 | 1.459                        | 4     |
|          | Equal variances not assumed |                                         |      | 1.459                        | 3.554 |

### Independent Samples Test

|          |                             | t-test for Equality of Means |                 |                       |                                           |
|----------|-----------------------------|------------------------------|-----------------|-----------------------|-------------------------------------------|
|          |                             | Sig. (2-tailed)              | Mean Difference | Std. Error Difference | 95% Confidence Interval of the Difference |
|          |                             |                              |                 |                       | Lower                                     |
| Activity | Equal variances assumed     | .218                         | 675.03333       | 462.69885             | -609.62462                                |
|          | Equal variances not assumed | .227                         | 675.03333       | 462.69885             | -675.84150                                |

### Independent Samples Test

|  |                              |
|--|------------------------------|
|  | t-test for Equality of Means |
|--|------------------------------|

|          |                             | 95% Confidence Interval of the<br>Difference |
|----------|-----------------------------|----------------------------------------------|
|          |                             | Upper                                        |
| Activity | Equal variances assumed     | 1959.69129                                   |
|          | Equal variances not assumed | 2025.90817                                   |
