# Supplementary material for: Engineering of CHO cells for the production of vertebrate recombinant sialyltransferases
Source: PeerJ journal article supplement (doi:10.7717/peerj.5788), 2019-02-11
Supplement: Fig6_RawDataSet1.pdf [file Fig6_RawDataSet1.pdf]

## **Figure 6:T-Test**

### **Legend to Figure 6 Raw Data Set 1**

| Label for Statistics | Corresponding in Manuscript    |
|----------------------|--------------------------------|
| ASF                  | ASF (Asialofetuin)             |
| A5                   | hST6 A5                        |
| B1                   | hST6 B1                        |
| G1                   | hST6                           |
| Dre                  | zST6                           |
| Gac                  | sST6                           |
| Tru                  | fST6                           |
| Gga                  | cST6                           |
| Rno                  | rST6                           |
| Ctrl                 | mST6 (commercial mouse enzyme) |
| ST3A2                | hST3 A2                        |
| ST3A1                | hST3 A2                        |
| ST3H6                | zST3                           |
| ST2                  | hST6Gal2                       |

### **T-Test: hST6 A5**

#### **Notes**

|                        |                           |                                                                                                                                     |
|------------------------|---------------------------|-------------------------------------------------------------------------------------------------------------------------------------|
| Output Created         |                           | 11-JUL-2018 17:09:44                                                                                                                |
| Comments               |                           |                                                                                                                                     |
| Input                  | Data                      | \\gweng.gmadtree.gmit.ie\STAFF\Benoi<br>t.Houeix\Documents\ST.sav                                                                   |
|                        | Active Dataset            | DataSet1                                                                                                                            |
|                        | Filter                    | <none>                                                                                                                              |
|                        | Weight                    | <none>                                                                                                                              |
|                        | Split File                | <none>                                                                                                                              |
|                        | N of Rows in Working Data | 45                                                                                                                                  |
|                        | File                      |                                                                                                                                     |
| Missing Value Handling | Definition of Missing     | User defined missing values are<br>treated as missing.                                                                              |
|                        | Cases Used                | Statistics for each analysis are based<br>on the cases with no missing or<br>out-of-range data for any variable in the<br>analysis. |

|           |                                  |  |             |
|-----------|----------------------------------|--|-------------|
| Syntax    | T-TEST GROUPS=Sample('A5' 'ASF') |  |             |
|           | /MISSING=ANALYSIS                |  |             |
|           | /VARIABLES=value1                |  |             |
|           | /CRITERIA=CI(.95).               |  |             |
| Resources | Processor Time                   |  | 00:00:00.00 |
|           | Elapsed Time                     |  | 00:00:00.03 |

**Group Statistics**

|       | Sample | N | Mean   | Std. Deviation | Std. Error Mean |
|-------|--------|---|--------|----------------|-----------------|
| SNA-I | A5     | 3 | .77287 | .045671        | .026368         |
|       | ASF    | 3 | .60230 | .008643        | .004990         |

**Independent Samples Test**

|       |                             | Levene's Test for Equality of Variances |      | t-test for Equality of Means |       |
|-------|-----------------------------|-----------------------------------------|------|------------------------------|-------|
|       |                             | F                                       | Sig. | t                            | df    |
| SNA-I | Equal variances assumed     | 3.018                                   | .157 | 6.356                        | 4     |
|       | Equal variances not assumed |                                         |      | 6.356                        | 2.143 |

**Independent Samples Test**

|       |                             | t-test for Equality of Means |                 |                       |                                           |
|-------|-----------------------------|------------------------------|-----------------|-----------------------|-------------------------------------------|
|       |                             | Sig. (2-tailed)              | Mean Difference | Std. Error Difference | 95% Confidence Interval of the Difference |
|       |                             |                              |                 |                       | Lower                                     |
| SNA-I | Equal variances assumed     | .003                         | .170567         | .026836               | .096058                                   |
|       | Equal variances not assumed | .020                         | .170567         | .026836               | .062183                                   |

**Independent Samples Test**

|       |                             | t-test for Equality of Means              |  |
|-------|-----------------------------|-------------------------------------------|--|
|       |                             | 95% Confidence Interval of the Difference |  |
|       |                             | Upper                                     |  |
| SNA-I | Equal variances assumed     | .245076                                   |  |
|       | Equal variances not assumed | .278951                                   |  |

**Notes**

|                        |                                   |                                                                                                                                     |
|------------------------|-----------------------------------|-------------------------------------------------------------------------------------------------------------------------------------|
| Output Created         |                                   | 11-JUL-2018 17:09:57                                                                                                                |
| Comments               |                                   |                                                                                                                                     |
| Input                  | Data                              | \\gweng.gmadtree.gmit.ie\STAFF\Benoi<br>t.Houeix\Documents\ST.sav                                                                   |
|                        | Active Dataset                    | DataSet1                                                                                                                            |
|                        | Filter                            | <none>                                                                                                                              |
|                        | Weight                            | <none>                                                                                                                              |
|                        | Split File                        | <none>                                                                                                                              |
|                        | N of Rows in Working Data<br>File | 45                                                                                                                                  |
| Missing Value Handling | Definition of Missing             | User defined missing values are<br>treated as missing.                                                                              |
|                        | Cases Used                        | Statistics for each analysis are based<br>on the cases with no missing or<br>out-of-range data for any variable in the<br>analysis. |
| Syntax                 |                                   | T-TEST GROUPS=Sample('1' 'ASF')<br>/MISSING=ANALYSIS<br>/VARIABLES=value1<br>/CRITERIA=CI(.95).                                     |
| Resources              | Processor Time                    | 00:00:00.00                                                                                                                         |
|                        | Elapsed Time                      | 00:00:00.01                                                                                                                         |

## T-Test: hST6 B1

### Notes

|                        |                           |                                                                                                                            |
|------------------------|---------------------------|----------------------------------------------------------------------------------------------------------------------------|
| Output Created         | 11-JUL-2018 17:10:23      |                                                                                                                            |
| Comments               |                           |                                                                                                                            |
| Input                  | Data                      | \\gweng.gmadtree.gmit.ie\STAFF\Benoi<br>t.Houeix\Documents\ST.sav                                                          |
|                        | Active Dataset            | DataSet1                                                                                                                   |
|                        | Filter                    | <none>                                                                                                                     |
|                        | Weight                    | <none>                                                                                                                     |
|                        | Split File                | <none>                                                                                                                     |
|                        | N of Rows in Working Data | 45                                                                                                                         |
|                        | File                      |                                                                                                                            |
| Missing Value Handling | Definition of Missing     | User defined missing values are treated as missing.                                                                        |
|                        | Cases Used                | Statistics for each analysis are based on the cases with no missing or out-of-range data for any variable in the analysis. |
| Syntax                 |                           | T-TEST GROUPS=Sample('B1' 'ASF')<br>/MISSING=ANALYSIS<br>/VARIABLES=value1<br>/CRITERIA=CI(.95).                           |
| Resources              | Processor Time            | 00:00:00.00                                                                                                                |
|                        | Elapsed Time              | 00:00:00.05                                                                                                                |

### Group Statistics

|       | Sample | N | Mean    | Std. Deviation | Std. Error Mean |
|-------|--------|---|---------|----------------|-----------------|
| SNA-I | B1     | 3 | 1.38367 | .074086        | .042774         |
|       | ASF    | 3 | .60230  | .008643        | .004990         |

### Independent Samples Test

|       |                             | Levene's Test for Equality of Variances |      | t-test for Equality of Means |       |
|-------|-----------------------------|-----------------------------------------|------|------------------------------|-------|
|       |                             | F                                       | Sig. | t                            | df    |
| SNA-I | Equal variances assumed     | 10.726                                  | .031 | 18.144                       | 4     |
|       | Equal variances not assumed |                                         |      | 18.144                       | 2.054 |

**Independent Samples Test**

|       |                             | t-test for Equality of Means |                 |                       |                                           |
|-------|-----------------------------|------------------------------|-----------------|-----------------------|-------------------------------------------|
|       |                             | Sig. (2-tailed)              | Mean Difference | Std. Error Difference | 95% Confidence Interval of the Difference |
|       |                             |                              |                 |                       | Lower                                     |
| SNA-I | Equal variances assumed     | .000                         | .781367         | .043064               | .661803                                   |
|       | Equal variances not assumed | .003                         | .781367         | .043064               | .600705                                   |

**Independent Samples Test**

|       |                             | t-test for Equality of Means              |  |
|-------|-----------------------------|-------------------------------------------|--|
|       |                             | 95% Confidence Interval of the Difference |  |
|       |                             | Upper                                     |  |
| SNA-I | Equal variances assumed     | .900931                                   |  |
|       | Equal variances not assumed | .962028                                   |  |

**T-Test: hST6**

**Notes**

|                        |                                                                                                  |                                                                                                                            |
|------------------------|--------------------------------------------------------------------------------------------------|----------------------------------------------------------------------------------------------------------------------------|
| Output Created         | 11-JUL-2018 17:10:44                                                                             |                                                                                                                            |
| Comments               |                                                                                                  |                                                                                                                            |
| Input                  | Data                                                                                             | \\gweng.gmadtree.gmit.ie\STAFF\Benoit.Houeix\Documents\ST.sav                                                              |
|                        | Active Dataset                                                                                   | DataSet1                                                                                                                   |
|                        | Filter                                                                                           | <none>                                                                                                                     |
|                        | Weight                                                                                           | <none>                                                                                                                     |
|                        | Split File                                                                                       | <none>                                                                                                                     |
|                        | N of Rows in Working Data File                                                                   | 45                                                                                                                         |
| Missing Value Handling | Definition of Missing                                                                            | User defined missing values are treated as missing.                                                                        |
|                        | Cases Used                                                                                       | Statistics for each analysis are based on the cases with no missing or out-of-range data for any variable in the analysis. |
| Syntax                 | T-TEST GROUPS=Sample('G1' 'ASF')<br>/MISSING=ANALYSIS<br>/VARIABLES=value1<br>/CRITERIA=CI(.95). |                                                                                                                            |

|           |                |             |
|-----------|----------------|-------------|
| Resources | Processor Time | 00:00:00.02 |
|           | Elapsed Time   | 00:00:00.02 |

**Group Statistics**

|       | Sample | N | Mean   | Std. Deviation | Std. Error Mean |
|-------|--------|---|--------|----------------|-----------------|
| SNA-I | G1     | 3 | .65920 | .041122        | .023742         |
|       | ASF    | 3 | .60230 | .008643        | .004990         |

**Independent Samples Test**

|       |                             | Levene's Test for Equality of Variances |      | t-test for Equality of Means |       |
|-------|-----------------------------|-----------------------------------------|------|------------------------------|-------|
|       |                             | F                                       | Sig. | t                            | df    |
| SNA-I | Equal variances assumed     | 4.946                                   | .090 | 2.345                        | 4     |
|       | Equal variances not assumed |                                         |      | 2.345                        | 2.176 |

**Independent Samples Test**

|       |                             | t-test for Equality of Means |                 |                       |                                           |
|-------|-----------------------------|------------------------------|-----------------|-----------------------|-------------------------------------------|
|       |                             | Sig. (2-tailed)              | Mean Difference | Std. Error Difference | 95% Confidence Interval of the Difference |
|       |                             |                              |                 |                       | Lower                                     |
| SNA-I | Equal variances assumed     | .079                         | .056900         | .024261               | -.010459                                  |
|       | Equal variances not assumed | .133                         | .056900         | .024261               | -.039784                                  |

**Independent Samples Test**

|       |                             | t-test for Equality of Means              |  |
|-------|-----------------------------|-------------------------------------------|--|
|       |                             | 95% Confidence Interval of the Difference |  |
|       |                             | Upper                                     |  |
| SNA-I | Equal variances assumed     | .124259                                   |  |
|       | Equal variances not assumed | .153584                                   |  |

**T-Test: zST6**

**Notes**

|                        |                           |                                                                                                                            |
|------------------------|---------------------------|----------------------------------------------------------------------------------------------------------------------------|
| Output Created         | 11-JUL-2018 17:11:01      |                                                                                                                            |
| Comments               |                           |                                                                                                                            |
| Input                  | Data                      | \\gweng.gmadtree.gmit.ie\STAFF\Benoi<br>t.Houeix\Documents\ST.sav                                                          |
|                        | Active Dataset            | DataSet1                                                                                                                   |
|                        | Filter                    | <none>                                                                                                                     |
|                        | Weight                    | <none>                                                                                                                     |
|                        | Split File                | <none>                                                                                                                     |
|                        | N of Rows in Working Data | 45                                                                                                                         |
|                        | File                      |                                                                                                                            |
| Missing Value Handling | Definition of Missing     | User defined missing values are treated as missing.                                                                        |
|                        | Cases Used                | Statistics for each analysis are based on the cases with no missing or out-of-range data for any variable in the analysis. |
| Syntax                 |                           | T-TEST GROUPS=Sample('Dre' 'ASF')<br>/MISSING=ANALYSIS<br>/VARIABLES=value1<br>/CRITERIA=CI(.95).                          |
| Resources              | Processor Time            | 00:00:00.00                                                                                                                |
|                        | Elapsed Time              | 00:00:00.00                                                                                                                |

**Group Statistics**

| Sample    | N | Mean    | Std. Deviation | Std. Error Mean |
|-----------|---|---------|----------------|-----------------|
| SNA-I Dre | 3 | 1.07970 | .057551        | .033227         |
| ASF       | 3 | .60230  | .008643        | .004990         |

**Independent Samples Test**

|                               | Levene's Test for Equality of Variances |      | t-test for Equality of Means |    |
|-------------------------------|-----------------------------------------|------|------------------------------|----|
|                               | F                                       | Sig. | t                            | df |
| SNA-I Equal variances assumed | 9.166                                   | .039 | 14.208                       | 4  |



|                             |  |  |        |       |
|-----------------------------|--|--|--------|-------|
| Equal variances not assumed |  |  | 14.208 | 2.090 |
|-----------------------------|--|--|--------|-------|

**Independent Samples Test**

|       |                             | t-test for Equality of Means |                 |                       |                                           |
|-------|-----------------------------|------------------------------|-----------------|-----------------------|-------------------------------------------|
|       |                             | Sig. (2-tailed)              | Mean Difference | Std. Error Difference | 95% Confidence Interval of the Difference |
| Lower |                             |                              |                 |                       |                                           |
| SNA-I | Equal variances assumed     | .000                         | .477400         | .033600               | .384112                                   |
|       | Equal variances not assumed | .004                         | .477400         | .033600               | .338647                                   |

**Independent Samples Test**

|       |                             | t-test for Equality of Means              |  |
|-------|-----------------------------|-------------------------------------------|--|
|       |                             | 95% Confidence Interval of the Difference |  |
|       |                             | Upper                                     |  |
| SNA-I | Equal variances assumed     | .570688                                   |  |
|       | Equal variances not assumed | .616153                                   |  |

**T-Test: sST6**

**Notes**

|                        |                           |                                                               |
|------------------------|---------------------------|---------------------------------------------------------------|
| Output Created         | 11-JUL-2018 17:11:19      |                                                               |
| Comments               |                           |                                                               |
| Input                  | Data                      | \\gweng.gmadtree.gmit.ie\STAFF\Benoit.Houeix\Documents\ST.sav |
|                        | Active Dataset            | DataSet1                                                      |
|                        | Filter                    | <none>                                                        |
|                        | Weight                    | <none>                                                        |
|                        | Split File                | <none>                                                        |
|                        | N of Rows in Working Data | 45                                                            |
|                        | File                      |                                                               |
| Missing Value Handling | Definition of Missing     | User defined missing values are treated as missing.           |

|            |                |                                                                                                                            |
|------------|----------------|----------------------------------------------------------------------------------------------------------------------------|
| Cases Used |                | Statistics for each analysis are based on the cases with no missing or out-of-range data for any variable in the analysis. |
| Syntax     |                | T-TEST GROUPS=Sample('Gac' 'ASF')<br>/MISSING=ANALYSIS<br>/VARIABLES=value1<br>/CRITERIA=CI(.95).                          |
| Resources  | Processor Time | 00:00:00.02                                                                                                                |
|            | Elapsed Time   | 00:00:00.03                                                                                                                |

### Group Statistics

| Sample    | N | Mean   | Std. Deviation | Std. Error Mean |
|-----------|---|--------|----------------|-----------------|
| SNA-I Gac | 3 | .81133 | .140832        | .081310         |
| ASF       | 3 | .60230 | .008643        | .004990         |

### Independent Samples Test

|       |                             | Levene's Test for Equality of Variances |      | t-test for Equality of Means |       |
|-------|-----------------------------|-----------------------------------------|------|------------------------------|-------|
|       |                             | F                                       | Sig. | t                            | df    |
| SNA-I | Equal variances assumed     | 13.858                                  | .020 | 2.566                        | 4     |
|       | Equal variances not assumed |                                         |      | 2.566                        | 2.015 |

### Independent Samples Test

|       |                             | t-test for Equality of Means |                 |                       |                                           |
|-------|-----------------------------|------------------------------|-----------------|-----------------------|-------------------------------------------|
|       |                             | Sig. (2-tailed)              | Mean Difference | Std. Error Difference | 95% Confidence Interval of the Difference |
|       |                             |                              |                 |                       | Lower                                     |
| SNA-I | Equal variances assumed     | .062                         | .209033         | .081463               | -.017143                                  |
|       | Equal variances not assumed | .123                         | .209033         | .081463               | -.138973                                  |

### Independent Samples Test

|  |  | t-test for Equality of Means              |
|--|--|-------------------------------------------|
|  |  | 95% Confidence Interval of the Difference |
|  |  |                                           |

|       |                             |         |
|-------|-----------------------------|---------|
|       |                             | Upper   |
| SNA-I | Equal variances assumed     | .435210 |
|       | Equal variances not assumed | .557039 |

## T-Test: fST6

### Notes

|                        |                                                                                                   |                                                                                                                            |
|------------------------|---------------------------------------------------------------------------------------------------|----------------------------------------------------------------------------------------------------------------------------|
| Output Created         | 11-JUL-2018 17:11:41                                                                              |                                                                                                                            |
| Comments               |                                                                                                   |                                                                                                                            |
| Input                  | Data                                                                                              | \\gweng.gmadtree.gmit.ie\STAFF\Benoi<br>t.Houeix\Documents\ST.sav                                                          |
|                        | Active Dataset                                                                                    | DataSet1                                                                                                                   |
|                        | Filter                                                                                            | <none>                                                                                                                     |
|                        | Weight                                                                                            | <none>                                                                                                                     |
|                        | Split File                                                                                        | <none>                                                                                                                     |
|                        | N of Rows in Working Data                                                                         | 45                                                                                                                         |
|                        | File                                                                                              |                                                                                                                            |
| Missing Value Handling | Definition of Missing                                                                             | User defined missing values are treated as missing.                                                                        |
|                        | Cases Used                                                                                        | Statistics for each analysis are based on the cases with no missing or out-of-range data for any variable in the analysis. |
| Syntax                 | T-TEST GROUPS=Sample('Tru' 'ASF')<br>/MISSING=ANALYSIS<br>/VARIABLES=value1<br>/CRITERIA=CI(.95). |                                                                                                                            |
| Resources              | Processor Time                                                                                    | 00:00:00.00                                                                                                                |
|                        | Elapsed Time                                                                                      | 00:00:00.02                                                                                                                |

### Group Statistics

|       | Sample | N | Mean    | Std. Deviation | Std. Error Mean |
|-------|--------|---|---------|----------------|-----------------|
| SNA-I | Tru    | 3 | 1.18953 | .107552        | .062095         |
|       | ASF    | 3 | .60230  | .008643        | .004990         |

### Independent Samples Test

|       |                             | Levene's Test for Equality of Variances |      | t-test for Equality of Means |       |
|-------|-----------------------------|-----------------------------------------|------|------------------------------|-------|
|       |                             | F                                       | Sig. | t                            | df    |
| SNA-I | Equal variances assumed     | 8.849                                   | .041 | 9.427                        | 4     |
|       | Equal variances not assumed |                                         |      | 9.427                        | 2.026 |

#### Independent Samples Test

|       |                             | t-test for Equality of Means |                 |                       |                                           |
|-------|-----------------------------|------------------------------|-----------------|-----------------------|-------------------------------------------|
|       |                             | Sig. (2-tailed)              | Mean Difference | Std. Error Difference | 95% Confidence Interval of the Difference |
| Lower |                             |                              |                 |                       |                                           |
| SNA-I | Equal variances assumed     | .001                         | .587233         | .062295               | .414274                                   |
|       | Equal variances not assumed | .011                         | .587233         | .062295               | .322447                                   |

#### Independent Samples Test

|       |                             | t-test for Equality of Means              |  |
|-------|-----------------------------|-------------------------------------------|--|
|       |                             | 95% Confidence Interval of the Difference |  |
|       |                             | Upper                                     |  |
| SNA-I | Equal variances assumed     | .760193                                   |  |
|       | Equal variances not assumed | .852020                                   |  |

### T-Test: cST6

#### Notes

|                        |                           |                                                                   |
|------------------------|---------------------------|-------------------------------------------------------------------|
| Output Created         | 11-JUL-2018 17:12:16      |                                                                   |
| Comments               |                           |                                                                   |
| Input                  | Data                      | \\gweng.gmadtree.gmit.ie\STAFF\Benoi<br>t.Houeix\Documents\ST.sav |
|                        | Active Dataset            | DataSet1                                                          |
|                        | Filter                    | <none>                                                            |
|                        | Weight                    | <none>                                                            |
|                        | Split File                | <none>                                                            |
|                        | N of Rows in Working Data | 45                                                                |
|                        | File                      |                                                                   |
| Missing Value Handling | Definition of Missing     | User defined missing values are treated as missing.               |

|            |                |                                                                                                                            |
|------------|----------------|----------------------------------------------------------------------------------------------------------------------------|
| Cases Used |                | Statistics for each analysis are based on the cases with no missing or out-of-range data for any variable in the analysis. |
| Syntax     |                | T-TEST GROUPS=Sample('Gga' 'ASF')<br>/MISSING=ANALYSIS<br>/VARIABLES=value1<br>/CRITERIA=CI(.95).                          |
| Resources  | Processor Time | 00:00:00.00                                                                                                                |
|            | Elapsed Time   | 00:00:00.00                                                                                                                |

### Group Statistics

|       | Sample | N | Mean    | Std. Deviation | Std. Error Mean |
|-------|--------|---|---------|----------------|-----------------|
| SNA-I | Gga    | 3 | 2.55470 | .110604        | .063857         |
|       | ASF    | 3 | .60230  | .008643        | .004990         |

### Independent Samples Test

|       |                             | Levene's Test for Equality of Variances |      | t-test for Equality of Means |       |
|-------|-----------------------------|-----------------------------------------|------|------------------------------|-------|
|       |                             | F                                       | Sig. | t                            | df    |
| SNA-I | Equal variances assumed     | 6.556                                   | .063 | 30.481                       | 4     |
|       | Equal variances not assumed |                                         |      | 30.481                       | 2.024 |

### Independent Samples Test

|       |                             | t-test for Equality of Means |                 |                       |                                           |
|-------|-----------------------------|------------------------------|-----------------|-----------------------|-------------------------------------------|
|       |                             | Sig. (2-tailed)              | Mean Difference | Std. Error Difference | 95% Confidence Interval of the Difference |
|       |                             |                              |                 |                       | Lower                                     |
| SNA-I | Equal variances assumed     | .000                         | 1.952400        | .064052               | 1.774563                                  |
|       | Equal variances not assumed | .001                         | 1.952400        | .064052               | 1.679969                                  |

### Independent Samples Test

|  |                              |
|--|------------------------------|
|  | t-test for Equality of Means |
|--|------------------------------|

|       |                             |                                           |
|-------|-----------------------------|-------------------------------------------|
|       |                             | 95% Confidence Interval of the Difference |
|       |                             | Upper                                     |
| SNA-I | Equal variances assumed     | 2.130237                                  |
|       | Equal variances not assumed | 2.224831                                  |

## T-Test: rST6

### Notes

|                        |                                                                                                   |                                                                                                                            |
|------------------------|---------------------------------------------------------------------------------------------------|----------------------------------------------------------------------------------------------------------------------------|
| Output Created         | 11-JUL-2018 17:12:30                                                                              |                                                                                                                            |
| Comments               |                                                                                                   |                                                                                                                            |
| Input                  | Data                                                                                              | \\gweng.gmadtree.gmit.ie\STAFF\Benoi<br>t.Houeix\Documents\ST.sav                                                          |
|                        | Active Dataset                                                                                    | DataSet1                                                                                                                   |
|                        | Filter                                                                                            | <none>                                                                                                                     |
|                        | Weight                                                                                            | <none>                                                                                                                     |
|                        | Split File                                                                                        | <none>                                                                                                                     |
|                        | N of Rows in Working Data File                                                                    | 45                                                                                                                         |
| Missing Value Handling | Definition of Missing                                                                             | User defined missing values are treated as missing.                                                                        |
|                        | Cases Used                                                                                        | Statistics for each analysis are based on the cases with no missing or out-of-range data for any variable in the analysis. |
| Syntax                 | T-TEST GROUPS=Sample('Rno' 'ASF')<br>/MISSING=ANALYSIS<br>/VARIABLES=value1<br>/CRITERIA=CI(.95). |                                                                                                                            |
| Resources              | Processor Time                                                                                    | 00:00:00.03                                                                                                                |
|                        | Elapsed Time                                                                                      | 00:00:00.03                                                                                                                |

### Group Statistics

|       | Sample | N | Mean    | Std. Deviation | Std. Error Mean |
|-------|--------|---|---------|----------------|-----------------|
| SNA-I | Rno    | 3 | 2.19693 | .126660        | .073127         |

|     |   |        |         |         |
|-----|---|--------|---------|---------|
| ASF | 3 | .60230 | .008643 | .004990 |
|-----|---|--------|---------|---------|

**Independent Samples Test**

|       |                             | Levene's Test for Equality of Variances |      | t-test for Equality of Means |       |
|-------|-----------------------------|-----------------------------------------|------|------------------------------|-------|
|       |                             | F                                       | Sig. | t                            | df    |
| SNA-I | Equal variances assumed     | 4.760                                   | .095 | 21.756                       | 4     |
|       | Equal variances not assumed |                                         |      | 21.756                       | 2.019 |

**Independent Samples Test**

|       |                             | t-test for Equality of Means |                 |                       |
|-------|-----------------------------|------------------------------|-----------------|-----------------------|
|       |                             | Sig. (2-tailed)              | Mean Difference | Std. Error Difference |
| SNA-I | Equal variances assumed     | .000                         | 1.594633        | .073297               |
|       | Equal variances not assumed | .002                         | 1.594633        | .073297               |

**Independent Samples Test**

|       |                             | t-test for Equality of Means              |  |
|-------|-----------------------------|-------------------------------------------|--|
|       |                             | 95% Confidence Interval of the Difference |  |
| SNA-I | Equal variances assumed     | Upper                                     |  |
|       | Equal variances not assumed | 1.907233                                  |  |

**T-Test: mST6 (commercial control)**

**Notes**

|                |                      |                                                               |
|----------------|----------------------|---------------------------------------------------------------|
| Output Created | 11-JUL-2018 17:12:47 |                                                               |
| Comments       |                      |                                                               |
| Input          | Data                 | \\gweng.gmadtree.gmit.ie\STAFF\Benoit.Houeix\Documents\ST.sav |
|                | Active Dataset       | DataSet1                                                      |
|                | Filter               | <none>                                                        |
|                | Weight               | <none>                                                        |
|                | Split File           | <none>                                                        |

|                        |                           |                                                                                                                            |
|------------------------|---------------------------|----------------------------------------------------------------------------------------------------------------------------|
|                        | N of Rows in Working Data | 45                                                                                                                         |
|                        | File                      |                                                                                                                            |
| Missing Value Handling | Definition of Missing     | User defined missing values are treated as missing.                                                                        |
|                        | Cases Used                | Statistics for each analysis are based on the cases with no missing or out-of-range data for any variable in the analysis. |
| Syntax                 |                           | T-TEST GROUPS=Sample('Ctrl' 'ASF')<br>/MISSING=ANALYSIS<br>/VARIABLES=value1<br>/CRITERIA=CI(.95).                         |
| Resources              | Processor Time            | 00:00:00.00                                                                                                                |
|                        | Elapsed Time              | 00:00:00.02                                                                                                                |

#### Group Statistics

|       | Sample | N | Mean    | Std. Deviation | Std. Error Mean |
|-------|--------|---|---------|----------------|-----------------|
| SNA-I | Ctrl   | 3 | 2.64073 | .153787        | .088789         |
|       | ASF    | 3 | .60230  | .008643        | .004990         |

#### Independent Samples Test

|       |                             | Levene's Test for Equality of Variances |      | t-test for Equality of Means |       |
|-------|-----------------------------|-----------------------------------------|------|------------------------------|-------|
|       |                             | F                                       | Sig. | t                            | df    |
| SNA-I | Equal variances assumed     | 6.047                                   | .070 | 22.922                       | 4     |
|       | Equal variances not assumed |                                         |      | 22.922                       | 2.013 |

#### Independent Samples Test

|       |                             | t-test for Equality of Means |                 |                       |                                           |
|-------|-----------------------------|------------------------------|-----------------|-----------------------|-------------------------------------------|
|       |                             | Sig. (2-tailed)              | Mean Difference | Std. Error Difference | 95% Confidence Interval of the Difference |
|       |                             |                              |                 |                       | Lower                                     |
| SNA-I | Equal variances assumed     | .000                         | 2.038433        | .088929               | 1.791526                                  |
|       | Equal variances not assumed | .002                         | 2.038433        | .088929               | 1.658095                                  |



### Independent Samples Test

|       |                             | t-test for Equality of Means              |
|-------|-----------------------------|-------------------------------------------|
|       |                             | 95% Confidence Interval of the Difference |
|       |                             | Upper                                     |
| SNA-I | Equal variances assumed     | 2.285340                                  |
|       | Equal variances not assumed | 2.418772                                  |

### T-Test: hST3 A2

#### Notes

|                        |                                |                                                                                                                            |
|------------------------|--------------------------------|----------------------------------------------------------------------------------------------------------------------------|
| Output Created         | 11-JUL-2018 17:17:16           |                                                                                                                            |
| Comments               |                                |                                                                                                                            |
| Input                  | Data                           | \\gweng.gmadtree.gmit.ie\STAFF\Benoit.Houeix\Documents\ST.sav                                                              |
|                        | Active Dataset                 | DataSet1                                                                                                                   |
|                        | Filter                         | <none>                                                                                                                     |
|                        | Weight                         | <none>                                                                                                                     |
|                        | Split File                     | <none>                                                                                                                     |
|                        | N of Rows in Working Data File | 45                                                                                                                         |
| Missing Value Handling | Definition of Missing          | User defined missing values are treated as missing.                                                                        |
|                        | Cases Used                     | Statistics for each analysis are based on the cases with no missing or out-of-range data for any variable in the analysis. |
| Syntax                 |                                | T-TEST GROUPS=Sample('ST3A2' 'ASF')<br>/MISSING=ANALYSIS<br>/VARIABLES=value1<br>/CRITERIA=CI(.95).                        |
| Resources              | Processor Time                 | 00:00:00.00                                                                                                                |
|                        | Elapsed Time                   | 00:00:00.00                                                                                                                |

#### Group Statistics

|       | Sample | N | Mean   | Std. Deviation | Std. Error Mean |
|-------|--------|---|--------|----------------|-----------------|
| SNA-I | ST3A2  | 3 | .70623 | .065623        | .037887         |
|       | ASF    | 3 | .60230 | .008643        | .004990         |

**Independent Samples Test**

|       |                             | Levene's Test for Equality of Variances |      | t-test for Equality of Means |       |
|-------|-----------------------------|-----------------------------------------|------|------------------------------|-------|
|       |                             | F                                       | Sig. | t                            | df    |
| SNA-I | Equal variances assumed     | 8.227                                   | .046 | 2.720                        | 4     |
|       | Equal variances not assumed |                                         |      | 2.720                        | 2.069 |

**Independent Samples Test**

|       |                             | t-test for Equality of Means |                 |                       |                                           |
|-------|-----------------------------|------------------------------|-----------------|-----------------------|-------------------------------------------|
|       |                             | Sig. (2-tailed)              | Mean Difference | Std. Error Difference | 95% Confidence Interval of the Difference |
|       |                             |                              |                 |                       | Lower                                     |
| SNA-I | Equal variances assumed     | .053                         | .103933         | .038215               | -.002167                                  |
|       | Equal variances not assumed | .109                         | .103933         | .038215               | -.055320                                  |

**Independent Samples Test**

|       |                             | t-test for Equality of Means              |  |
|-------|-----------------------------|-------------------------------------------|--|
|       |                             | 95% Confidence Interval of the Difference |  |
|       |                             | Upper                                     |  |
| SNA-I | Equal variances assumed     | .210034                                   |  |
|       | Equal variances not assumed | .263187                                   |  |

**T-Test: hST3 A1**

**Notes**

|                |                      |                                                                   |
|----------------|----------------------|-------------------------------------------------------------------|
| Output Created | 11-JUL-2018 17:19:54 |                                                                   |
| Comments       |                      |                                                                   |
| Input          | Data                 | \\gweng.gmadtree.gmit.ie\STAFF\Benoi<br>t.Houeix\Documents\ST.sav |
|                | Active Dataset       | DataSet1                                                          |
|                | Filter               | <none>                                                            |
|                | Weight               | <none>                                                            |
|                | Split File           | <none>                                                            |

|                        |                           |                                                                                                                            |
|------------------------|---------------------------|----------------------------------------------------------------------------------------------------------------------------|
|                        | N of Rows in Working Data | 45                                                                                                                         |
|                        | File                      |                                                                                                                            |
| Missing Value Handling | Definition of Missing     | User defined missing values are treated as missing.                                                                        |
|                        | Cases Used                | Statistics for each analysis are based on the cases with no missing or out-of-range data for any variable in the analysis. |
| Syntax                 |                           | T-TEST GROUPS=Sample('ST3A1' 'ASF')<br>/MISSING=ANALYSIS<br>/VARIABLES=value1<br>/CRITERIA=CI(.95).                        |
| Resources              | Processor Time            | 00:00:00.00                                                                                                                |
|                        | Elapsed Time              | 00:00:00.02                                                                                                                |

#### Group Statistics

| Sample      | N | Mean   | Std. Deviation | Std. Error Mean |
|-------------|---|--------|----------------|-----------------|
| SNA-I ST3A1 | 3 | .80123 | .033994        | .019626         |
| ASF         | 3 | .60230 | .008643        | .004990         |

#### Independent Samples Test

|       |                             | Levene's Test for Equality of Variances |      | t-test for Equality of Means |       |
|-------|-----------------------------|-----------------------------------------|------|------------------------------|-------|
|       |                             | F                                       | Sig. | t                            | df    |
| SNA-I | Equal variances assumed     | 7.959                                   | .048 | 9.823                        | 4     |
|       | Equal variances not assumed |                                         |      | 9.823                        | 2.258 |

#### Independent Samples Test

|       |                             | t-test for Equality of Means |                 |                       |                                           |
|-------|-----------------------------|------------------------------|-----------------|-----------------------|-------------------------------------------|
|       |                             | Sig. (2-tailed)              | Mean Difference | Std. Error Difference | 95% Confidence Interval of the Difference |
|       |                             |                              |                 |                       | Lower                                     |
| SNA-I | Equal variances assumed     | .001                         | .198933         | .020251               | .142708                                   |
|       | Equal variances not assumed | .007                         | .198933         | .020251               | .120666                                   |

**Independent Samples Test**

|       |                             |                                           |
|-------|-----------------------------|-------------------------------------------|
|       |                             | t-test for Equality of Means              |
|       |                             | 95% Confidence Interval of the Difference |
|       |                             | Upper                                     |
| SNA-I | Equal variances assumed     | .255159                                   |
|       | Equal variances not assumed | .277201                                   |

**T-Test: zST3**

**Notes**

|                        |                                                                                                       |                                                                                                                            |
|------------------------|-------------------------------------------------------------------------------------------------------|----------------------------------------------------------------------------------------------------------------------------|
| Output Created         | 11-JUL-2018 17:20:13                                                                                  |                                                                                                                            |
| Comments               |                                                                                                       |                                                                                                                            |
| Input                  | Data                                                                                                  | \\gweng.gmadtree.gmit.ie\STAFF\Benoit.Houeix\Documents\ST.sav                                                              |
|                        | Active Dataset                                                                                        | DataSet1                                                                                                                   |
|                        | Filter                                                                                                | <none>                                                                                                                     |
|                        | Weight                                                                                                | <none>                                                                                                                     |
|                        | Split File                                                                                            | <none>                                                                                                                     |
|                        | N of Rows in Working Data File                                                                        | 45                                                                                                                         |
| Missing Value Handling | Definition of Missing                                                                                 | User defined missing values are treated as missing.                                                                        |
|                        | Cases Used                                                                                            | Statistics for each analysis are based on the cases with no missing or out-of-range data for any variable in the analysis. |
| Syntax                 | <pre>T-TEST GROUPS=Sample('ST3H6' 'ASF') /MISSING=ANALYSIS /VARIABLES=value1 /CRITERIA=CI(.95).</pre> |                                                                                                                            |
| Resources              | Processor Time                                                                                        | 00:00:00.02                                                                                                                |
|                        | Elapsed Time                                                                                          | 00:00:00.03                                                                                                                |

**Group Statistics**

| Sample      | N | Mean   | Std. Deviation | Std. Error Mean |
|-------------|---|--------|----------------|-----------------|
| SNA-I ST3H6 | 3 | .83217 | .074289        | .042891         |
| ASF         | 3 | .60230 | .008643        | .004990         |

**Independent Samples Test**

|       |                             | Levene's Test for Equality of Variances |      | t-test for Equality of Means |       |
|-------|-----------------------------|-----------------------------------------|------|------------------------------|-------|
|       |                             | F                                       | Sig. | t                            | df    |
| SNA-I | Equal variances assumed     | 5.627                                   | .077 | 5.323                        | 4     |
|       | Equal variances not assumed |                                         |      | 5.323                        | 2.054 |

**Independent Samples Test**

|       |                             | t-test for Equality of Means |                 |                       |                                           |
|-------|-----------------------------|------------------------------|-----------------|-----------------------|-------------------------------------------|
|       |                             | Sig. (2-tailed)              | Mean Difference | Std. Error Difference | 95% Confidence Interval of the Difference |
|       |                             |                              |                 |                       | Lower                                     |
| SNA-I | Equal variances assumed     | .006                         | .229867         | .043180               | .109979                                   |
|       | Equal variances not assumed | .032                         | .229867         | .043180               | .048691                                   |

**Independent Samples Test**

|       |                             | t-test for Equality of Means              |  |
|-------|-----------------------------|-------------------------------------------|--|
|       |                             | 95% Confidence Interval of the Difference |  |
|       |                             | Upper                                     |  |
| SNA-I | Equal variances assumed     | .349755                                   |  |
|       | Equal variances not assumed | .411042                                   |  |

**T-Test: hST6Gal2**

**Notes**

|                |                      |
|----------------|----------------------|
| Output Created | 11-JUL-2018 17:20:50 |
| Comments       |                      |

|                        |                           |                                                                                                                                     |
|------------------------|---------------------------|-------------------------------------------------------------------------------------------------------------------------------------|
| Input                  | Data                      | \\gweng.gmadtree.gmit.ie\STAFF\Benoi<br>t.Houeix\Documents\ST.sav                                                                   |
|                        | Active Dataset            | DataSet1                                                                                                                            |
|                        | Filter                    | <none>                                                                                                                              |
|                        | Weight                    | <none>                                                                                                                              |
|                        | Split File                | <none>                                                                                                                              |
|                        | N of Rows in Working Data | 45                                                                                                                                  |
|                        | File                      |                                                                                                                                     |
| Missing Value Handling | Definition of Missing     | User defined missing values are<br>treated as missing.                                                                              |
|                        | Cases Used                | Statistics for each analysis are based<br>on the cases with no missing or<br>out-of-range data for any variable in the<br>analysis. |
| Syntax                 |                           | T-TEST GROUPS=Sample('ST2' 'ASF')<br>/MISSING=ANALYSIS<br>/VARIABLES=value1<br>/CRITERIA=CI(.95).                                   |
| Resources              | Processor Time            | 00:00:00.00                                                                                                                         |
|                        | Elapsed Time              | 00:00:00.03                                                                                                                         |

#### Group Statistics

|       | Sample | N | Mean   | Std. Deviation | Std. Error Mean |
|-------|--------|---|--------|----------------|-----------------|
| SNA-I | ST2    | 3 | .58790 | .053927        | .031135         |
|       | ASF    | 3 | .60230 | .008643        | .004990         |

#### Independent Samples Test

|       |                                | Levene's Test for Equality of<br>Variances |      | t-test for Equality of<br>Means |       |
|-------|--------------------------------|--------------------------------------------|------|---------------------------------|-------|
|       |                                | F                                          | Sig. | t                               | df    |
| SNA-I | Equal variances assumed        | 7.825                                      | .049 | -.457                           | 4     |
|       | Equal variances not<br>assumed |                                            |      | -.457                           | 2.103 |

#### Independent Samples Test

|  |                              |
|--|------------------------------|
|  | t-test for Equality of Means |
|--|------------------------------|

|       |                             | Sig. (2-tailed) | Mean Difference | Std. Error Difference | 95% Confidence Interval of the Difference |
|-------|-----------------------------|-----------------|-----------------|-----------------------|-------------------------------------------|
|       |                             |                 |                 |                       | Lower                                     |
| SNA-I | Equal variances assumed     | .672            | -.014400        | .031532               | -.101948                                  |
|       | Equal variances not assumed | .691            | -.014400        | .031532               | -.143917                                  |

#### Independent Samples Test

|       |                             | t-test for Equality of Means              |
|-------|-----------------------------|-------------------------------------------|
|       |                             | 95% Confidence Interval of the Difference |
|       |                             | Upper                                     |
| SNA-I | Equal variances assumed     | .073148                                   |
|       | Equal variances not assumed | .115117                                   |

#### Notes

|                |                                                                                                                                                                                                 |                                                                   |
|----------------|-------------------------------------------------------------------------------------------------------------------------------------------------------------------------------------------------|-------------------------------------------------------------------|
| Output Created | 11-JUL-2018 17:24:09                                                                                                                                                                            |                                                                   |
| Comments       |                                                                                                                                                                                                 |                                                                   |
| Input          | Data                                                                                                                                                                                            | \\gweng.gmadtree.gmit.ie\STAFF\Benoi<br>t.Houeix\Documents\ST.sav |
|                | Active Dataset                                                                                                                                                                                  | DataSet1                                                          |
|                | Filter                                                                                                                                                                                          | <none>                                                            |
|                | Weight                                                                                                                                                                                          | <none>                                                            |
|                | Split File                                                                                                                                                                                      | <none>                                                            |
|                | N of Rows in Working Data File                                                                                                                                                                  | 45                                                                |
| Syntax         | NPTESTS<br>/INDEPENDENT TEST (value1<br>value2) GROUP (Sample)<br>KRUSKAL_WALLIS(COMPARE=PAIR<br>WISE)<br>/MISSING SCOPE=ANALYSIS<br>USERMISSING=EXCLUDE<br>/CRITERIA ALPHA=0.05<br>CILEVEL=95. |                                                                   |
| Resources      | Processor Time                                                                                                                                                                                  | 00:00:00.11                                                       |
|                | Elapsed Time                                                                                                                                                                                    | 00:00:00.13                                                       |
