# Supplementary material for: Engineering of CHO cells for the production of vertebrate recombinant sialyltransferases
Source: PeerJ journal article supplement (doi:10.7717/peerj.5788), 2019-02-11
Supplement: Fig6_RawDataSet3.pdf [file Fig6_RawDataSet3.pdf]

**Statistics ELLA experiment – Figure 6**

**Levene's Test of Equality of Error Variances<sup>a</sup>**

Dependent Variable: value1

| F     | df1 | df2 | Sig. |
|-------|-----|-----|------|
| 2.527 | 14  | 30  | .016 |

Tests the null hypothesis that the error variance of the dependent variable is equal across groups.

a. Design: Intercept + Sample

Data not normal => **Non parametric tests**

**Hypothesis Test Summary**

|   | Null Hypothesis                                                    | Test                                    | Sig. | Decision                    |
|---|--------------------------------------------------------------------|-----------------------------------------|------|-----------------------------|
| 1 | The distribution of SNA-I is the same across categories of Sample. | Independent-Samples Kruskal-Wallis Test | .000 | Reject the null hypothesis. |
| 2 | The distribution of RCA-I is the same across categories of Sample. | Independent-Samples Kruskal-Wallis Test | .006 | Reject the null hypothesis. |

Asymptotic significances are displayed. The significance level is .05.

**Multivariate Tests<sup>a</sup>**

| Effect    |                    | Value    | F                      | Hypothesis df | Error df | Sig. |
|-----------|--------------------|----------|------------------------|---------------|----------|------|
| Intercept | Pillai's Trace     | .999     | 15233.281 <sup>b</sup> | 2.000         | 29.000   | .000 |
|           | Wilks' Lambda      | .001     | 15233.281 <sup>b</sup> | 2.000         | 29.000   | .000 |
|           | Hotelling's Trace  | 1050.571 | 15233.281 <sup>b</sup> | 2.000         | 29.000   | .000 |
|           | Roy's Largest Root | 1050.571 | 15233.281 <sup>b</sup> | 2.000         | 29.000   | .000 |
| Sample    | Pillai's Trace     | 1.768    | 16.326                 | 28.000        | 60.000   | .000 |
|           | Wilks' Lambda      | .002     | 42.100 <sup>b</sup>    | 28.000        | 58.000   | .000 |
|           | Hotelling's Trace  | 103.516  | 103.516                | 28.000        | 56.000   | .000 |
|           | Roy's Largest Root | 100.015  | 214.317 <sup>c</sup>   | 14.000        | 30.000   | .000 |

a. Design: Intercept + Sample

b. Exact statistic

c. The statistic is an upper bound on F that yields a lower bound on the significance level.

Conclusion: Significant differences between samples

**Figure 6: Legend**

| Label for Statistics | Corresponding in Manuscript    |
|----------------------|--------------------------------|
| ASF                  | ASF (Asialofetuin)             |
| FET                  | FET (Fetuin)                   |
| A5                   | hST6 A5                        |
| B1                   | hST6 B1                        |
| G1                   | hST6                           |
| Dre                  | zST6                           |
| Gac                  | sST6                           |
| Tru                  | fST6                           |
| Gga                  | cST6                           |
| Rno                  | rST6                           |
| Ctrl                 | mST6 (commercial mouse enzyme) |
| ST3A2                | hST3 A2                        |
| ST3A1                | hST3 A2                        |
| ST3H6                | zST3                           |
| ST2                  | hST6Gal2                       |

**Posthoc Non-parametric test:**

**Multiple Comparisons**

Tamhane

| Dependent Variable | (I) Sample | (J) Sample | Mean Difference<br>(I-J) | Std. Error | Sig.  | 95% Confidence Interval |             |
|--------------------|------------|------------|--------------------------|------------|-------|-------------------------|-------------|
|                    |            |            |                          |            |       | Lower Bound             | Upper Bound |
| SNA-I              | A5         | ASF        | .17057                   | .026836    | .881  | -.81374                 | 1.15488     |
|                    |            | B1         | -.61080                  | .050248    | .072  | -1.29693                | .07533      |
|                    |            | Ctrl       | -1.86787                 | .092622    | .109  | -4.50383                | .76810      |
|                    |            | Dre        | -.30683                  | .042418    | .219  | -.77809                 | .16443      |
|                    |            | FET        | -2.09023                 | .109416    | .152  | -5.60628                | 1.42581     |
|                    |            | G1         | .11367                   | .035482    | .971  | -.25962                 | .48695      |
|                    |            | Gac        | -.03847                  | .085478    | 1.000 | -2.30482                | 2.22789     |
|                    |            | Gga        | -1.78183 <sup>*</sup>    | .069087    | .030  | -3.23693                | -.32674     |
|                    |            | Rno        | -1.42407                 | .077736    | .097  | -3.29835                | .45021      |
|                    |            | ST2        | .18497                   | .040800    | .694  | -.25365                 | .62359      |
|                    |            | ST3A1      | -.02837                  | .032870    | 1.000 | -.40905                 | .35232      |
|                    |            | ST3A2      | .06663                   | .046160    | 1.000 | -.49666                 | .62993      |
|                    |            | ST3H6      | -.05930                  | .050348    | 1.000 | -.74870                 | .63010      |
|                    |            | Tru        | -.41667                  | .067462    | .705  | -1.79620                | .96287      |

|       |       |          |         |         |          |         |
|-------|-------|----------|---------|---------|----------|---------|
| ASF   | A5    | -.17057  | .026836 | .881    | -1.15488 | .81374  |
|       | B1    | -.78137  | .043064 | .245    | -2.57315 | 1.01041 |
|       | Ctrl  | -2.03843 | .088929 | .176    | -5.98199 | 1.90512 |
|       | Dre   | -.47740  | .033600 | .351    | -1.80424 | .84944  |
|       | FET   | -2.26080 | .106309 | .203    | -7.00313 | 2.48153 |
|       | G1    | -.05690  | .024261 | 1.000   | -.90809  | .79429  |
|       | Gac   | -.20903  | .081463 | 1.000   | -3.80784 | 3.38977 |
|       | Gga   | -1.95240 | .064052 | .100    | -4.74137 | .83657  |
|       | Rno   | -1.59463 | .073297 | .191    | -4.81486 | 1.62559 |
|       | ST2   | .01440   | .031532 | 1.000   | -1.20879 | 1.23759 |
|       | ST3A1 | -.19893  | .020251 | .508    | -.84038  | .44251  |
|       | ST3A2 | -.10393  | .038215 | 1.000   | -1.65923 | 1.45136 |
|       | ST3H6 | -.22987  | .043180 | .966    | -2.02730 | 1.56757 |
|       | Tru   | -.58723  | .062295 | .674    | -3.29386 | 2.11939 |
|       | B1    | A5       | .61080  | .050248 | .072     | -.07533 |
| ASF   |       | .78137   | .043064 | .245    | -1.01041 | 2.57315 |
| Ctrl  |       | -1.25707 | .098555 | .125    | -3.01349 | .49936  |
| Dre   |       | .30397   | .054163 | .463    | -.30557  | .91350  |
| FET   |       | -1.47943 | .114482 | .179    | -3.95358 | .99472  |
| G1    |       | .72447   | .048921 | .055    | -.02120  | 1.47013 |
| Gac   |       | .57233   | .091874 | .575    | -.91280  | 2.05747 |
| Gga   |       | -1.17103 | .076859 | .026    | -2.14065 | -.20141 |
| Rno   |       | -.81327  | .084718 | .169    | -2.03425 | .40771  |
| ST2   |       | .79577   | .052905 | .021    | .17289   | 1.41864 |
| ST3A1 |       | .58243   | .047061 | .151    | -.30258  | 1.46745 |
| ST3A2 |       | .67743   | .057140 | .032    | .07336   | 1.28151 |
| ST3H6 |       | .55150   | .060574 | .081    | -.07659  | 1.17959 |
| Tru   |       | .19413   | .075402 | .999    | -.73405  | 1.12231 |
| Ctrl  |       | A5       | 1.86787 | .092622 | .109     | -.76810 |
|       | ASF   | 2.03843  | .088929 | .176    | -1.90512 | 5.98199 |
|       | B1    | 1.25707  | .098555 | .125    | -.49936  | 3.01349 |
|       | Dre   | 1.56103  | .094803 | .116    | -.64473  | 3.76680 |
|       | FET   | -.22237  | .138420 | 1.000   | -1.71892 | 1.27418 |
|       | G1    | 1.98153  | .091909 | .108    | -.83725  | 4.80032 |
|       | Gac   | 1.82940  | .120394 | .012    | .56820   | 3.09060 |
|       | Gga   | .08603   | .109368 | 1.000   | -1.21357 | 1.38563 |
|       | Rno   | .44380   | .115026 | .873    | -.80882  | 1.69642 |
|       | ST2   | 2.05283  | .094090 | .068    | -.27543  | 4.38110 |
|       | ST3A1 | 1.83950  | .090932 | .150    | -1.27465 | 4.95365 |
|       | ST3A2 | 1.93450  | .096535 | .052    | -.02934  | 3.89834 |
|       | ST3H6 | 1.80857  | .098606 | .046    | .05657   | 3.56056 |
|       | Tru   | 1.45120  | .108348 | .036    | .13437   | 2.76803 |

|       |       |                       |         |         |          |          |
|-------|-------|-----------------------|---------|---------|----------|----------|
| Dre   | A5    | .30683                | .042418 | .219    | -.16443  | .77809   |
|       | ASF   | .47740                | .033600 | .351    | -.84944  | 1.80424  |
|       | B1    | -.30397               | .054163 | .463    | -.91350  | .30557   |
|       | Ctrl  | -1.56103              | .094803 | .116    | -3.76680 | .64473   |
|       | FET   | -1.78340              | .111268 | .167    | -4.82239 | 1.25559  |
|       | G1    | .42050                | .040838 | .083    | -.06726  | .90826   |
|       | Gac   | .26837                | .087837 | .999    | -1.60179 | 2.13852  |
|       | Gga   | -1.47500 <sup>*</sup> | .071985 | .026    | -2.65278 | -.29722  |
|       | Rno   | -1.11723              | .080322 | .115    | -2.64400 | .40954   |
|       | ST2   | .49180 <sup>*</sup>   | .045535 | .044    | .01700   | .96660   |
|       | ST3A1 | .27847                | .038591 | .357    | -.27205  | .82898   |
|       | ST3A2 | .37347                | .050394 | .180    | -.16103  | .90797   |
|       | ST3H6 | .24753                | .054256 | .715    | -.36410  | .85917   |
|       | Tru   | -.10983               | .070426 | 1.000   | -1.22709 | 1.00742  |
|       | FET   | A5                    | 2.09023 | .109416 | .152     | -1.42581 |
| ASF   |       | 2.26080               | .106309 | .203    | -2.48153 | 7.00313  |
| B1    |       | 1.47943               | .114482 | .179    | -.99472  | 3.95358  |
| Ctrl  |       | .22237                | .138420 | 1.000   | -1.27418 | 1.71892  |
| Dre   |       | 1.78340               | .111268 | .167    | -1.25559 | 4.82239  |
| G1    |       | 2.20390               | .108813 | .148    | -1.50127 | 5.90907  |
| Gac   |       | 2.05177 <sup>*</sup>  | .133746 | .017    | .53261   | 3.57093  |
| Gga   |       | .30840                | .123913 | 1.000   | -1.42682 | 2.04362  |
| Rno   |       | .66617                | .128935 | .620    | -.92140  | 2.25373  |
| ST2   |       | 2.27520               | .110662 | .106    | -.90481  | 5.45521  |
| ST3A1 |       | 2.06187               | .107990 | .190    | -1.93489 | 6.05863  |
| ST3A2 |       | 2.15687               | .112748 | .089    | -.58872  | 4.90245  |
| ST3H6 |       | 2.03093               | .114526 | .082    | -.43717  | 4.49904  |
| Tru   |       | 1.67357               | .123014 | .060    | -.09990  | 3.44704  |
| G1    |       | A5                    | -.11367 | .035482 | .971     | -.48695  |
|       | ASF   | .05690                | .024261 | 1.000   | -.79429  | .90809   |
|       | B1    | -.72447               | .048921 | .055    | -1.47013 | .02120   |
|       | Ctrl  | -1.98153              | .091909 | .108    | -4.80032 | .83725   |
|       | Dre   | -.42050               | .040838 | .083    | -.90826  | .06726   |
|       | FET   | -2.20390              | .108813 | .148    | -5.90907 | 1.50127  |
|       | Gac   | -.15213               | .084705 | 1.000   | -2.59375 | 2.28948  |
|       | Gga   | -1.89550 <sup>*</sup> | .068128 | .033    | -3.49070 | -.30030  |
|       | Rno   | -1.53773              | .076885 | .096    | -3.57424 | .49877   |
|       | ST2   | .07130                | .039154 | 1.000   | -.37465  | .51725   |
|       | ST3A1 | -.14203               | .030804 | .680    | -.47687  | .19281   |
|       | ST3A2 | -.04703               | .044712 | 1.000   | -.64770  | .55363   |
|       | ST3H6 | -.17297               | .049024 | .979    | -.92242  | .57649   |
|       | Tru   | -.53033               | .066479 | .522    | -2.04479 | .98413   |

|       |       |                       |                      |         |          |         |
|-------|-------|-----------------------|----------------------|---------|----------|---------|
| Gac   | A5    | .03847                | .085478              | 1.000   | -2.22789 | 2.30482 |
|       | ASF   | .20903                | .081463              | 1.000   | -3.38977 | 3.80784 |
|       | B1    | -.57233               | .091874              | .575    | -2.05747 | .91280  |
|       | Ctrl  | -1.82940 <sup>*</sup> | .120394              | .012    | -3.09060 | -.56820 |
|       | Dre   | -.26837               | .087837              | .999    | -2.13852 | 1.60179 |
|       | FET   | -2.05177 <sup>*</sup> | .133746              | .017    | -3.57093 | -.53261 |
|       | G1    | .15213                | .084705              | 1.000   | -2.28948 | 2.59375 |
|       | Gga   | -1.74337 <sup>*</sup> | .103388              | .011    | -2.89907 | -.58767 |
|       | Rno   | -1.38560 <sup>*</sup> | .109356              | .025    | -2.53646 | -.23474 |
|       | ST2   | .22343                | .087067              | 1.000   | -1.75709 | 2.20396 |
|       | ST3A1 | .01010                | .083645              | 1.000   | -2.72262 | 2.74282 |
|       | ST3A2 | .10510                | .089703              | 1.000   | -1.55351 | 1.76371 |
|       | ST3H6 | -.02083               | .091929              | 1.000   | -1.50236 | 1.46069 |
|       | Tru   | -.37820               | .102309              | .918    | -1.54229 | .78589  |
|       | Gga   | A5                    | 1.78183 <sup>*</sup> | .069087 | .030     | .32674  |
| ASF   |       | 1.95240               | .064052              | .100    | -.83657  | 4.74137 |
| B1    |       | 1.17103 <sup>*</sup>  | .076859              | .026    | .20141   | 2.14065 |
| Ctrl  |       | -.08603               | .109368              | 1.000   | -1.38563 | 1.21357 |
| Dre   |       | 1.47500 <sup>*</sup>  | .071985              | .026    | .29722   | 2.65278 |
| FET   |       | -.30840               | .123913              | 1.000   | -2.04362 | 1.42682 |
| G1    |       | 1.89550 <sup>*</sup>  | .068128              | .033    | .30030   | 3.49070 |
| Gac   |       | 1.74337 <sup>*</sup>  | .103388              | .011    | .58767   | 2.89907 |
| Rno   |       | .35777                | .097084              | .901    | -.67350  | 1.38903 |
| ST2   |       | 1.96680 <sup>*</sup>  | .071043              | .014    | .71746   | 3.21614 |
| ST3A1 |       | 1.75347               | .066805              | .057    | -.09759  | 3.60453 |
| ST3A2 |       | 1.84847 <sup>*</sup>  | .074251              | .008    | .79415   | 2.90279 |
| ST3H6 |       | 1.72253 <sup>*</sup>  | .076925              | .007    | .75447   | 2.69060 |
| Tru   |       | 1.36517 <sup>*</sup>  | .089071              | .011    | .44065   | 2.28969 |
| Rno   |       | A5                    | 1.42407              | .077736 | .097     | -.45021 |
|       | ASF   | 1.59463               | .073297              | .191    | -1.62559 | 4.81486 |
|       | B1    | .81327                | .084718              | .169    | -.40771  | 2.03425 |
|       | Ctrl  | -.44380               | .115026              | .873    | -1.69642 | .80882  |
|       | Dre   | 1.11723               | .080322              | .115    | -.40954  | 2.64400 |
|       | FET   | -.66617               | .128935              | .620    | -2.25373 | .92140  |
|       | G1    | 1.53773               | .076885              | .096    | -.49877  | 3.57424 |
|       | Gac   | 1.38560 <sup>*</sup>  | .109356              | .025    | .23474   | 2.53646 |
|       | Gga   | -.35777               | .097084              | .901    | -1.38903 | .67350  |
|       | ST2   | 1.60903               | .079479              | .051    | -.01167  | 3.22973 |
|       | ST3A1 | 1.39570               | .075715              | .150    | -.92073  | 3.71213 |
|       | ST3A2 | 1.49070 <sup>*</sup>  | .082359              | .038    | .13676   | 2.84464 |
|       | ST3H6 | 1.36477 <sup>*</sup>  | .084777              | .035    | .14644   | 2.58309 |
|       | Tru   | 1.00740               | .095934              | .054    | -.02277  | 2.03757 |

|       |       |           |         |       |          |         |
|-------|-------|-----------|---------|-------|----------|---------|
| ST2   | A5    | -.18497   | .040800 | .694  | -.62359  | .25365  |
|       | ASF   | -.01440   | .031532 | 1.000 | -1.23759 | 1.20879 |
|       | B1    | -.79577*  | .052905 | .021  | -1.41864 | -.17289 |
|       | Ctrl  | -2.05283  | .094090 | .068  | -4.38110 | .27543  |
|       | Dre   | -.49180*  | .045535 | .044  | -.96660  | -.01700 |
|       | FET   | -2.27520  | .110662 | .106  | -5.45521 | .90481  |
|       | G1    | -.07130   | .039154 | 1.000 | -.51725  | .37465  |
|       | Gac   | -.22343   | .087067 | 1.000 | -2.20396 | 1.75709 |
|       | Gga   | -1.96680* | .071043 | .014  | -3.21614 | -.71746 |
|       | Rno   | -1.60903  | .079479 | .051  | -3.22973 | .01167  |
|       | ST3A1 | -.21333   | .036805 | .538  | -.70491  | .27825  |
|       | ST3A2 | -.11833   | .049039 | 1.000 | -.65295  | .41628  |
|       | ST3H6 | -.24427   | .053000 | .729  | -.86957  | .38103  |
|       | Tru   | -.60163   | .069464 | .306  | -1.78583 | .58256  |
| ST3A1 | A5    | .02837    | .032870 | 1.000 | -.35232  | .40905  |
|       | ASF   | .19893    | .020251 | .508  | -.44251  | .84038  |
|       | B1    | -.58243   | .047061 | .151  | -1.46745 | .30258  |
|       | Ctrl  | -1.83950  | .090932 | .150  | -4.95365 | 1.27465 |
|       | Dre   | -.27847   | .038591 | .357  | -.82898  | .27205  |
|       | FET   | -2.06187  | .107990 | .190  | -6.05863 | 1.93489 |
|       | G1    | .14203    | .030804 | .680  | -.19281  | .47687  |
|       | Gac   | -.01010   | .083645 | 1.000 | -2.74282 | 2.72262 |
|       | Gga   | -1.75347  | .066805 | .057  | -3.60453 | .09759  |
|       | Rno   | -1.39570  | .075715 | .150  | -3.71213 | .92073  |
|       | ST2   | .21333    | .036805 | .538  | -.27825  | .70491  |
|       | ST3A2 | .09500    | .042669 | 1.000 | -.60659  | .79659  |
|       | ST3H6 | -.03093   | .047168 | 1.000 | -.92063  | .85876  |
|       | Tru   | -.38830   | .065123 | .840  | -2.15236 | 1.37576 |
| ST3A2 | A5    | -.06663   | .046160 | 1.000 | -.62993  | .49666  |
|       | ASF   | .10393    | .038215 | 1.000 | -1.45136 | 1.65923 |
|       | B1    | -.67743*  | .057140 | .032  | -1.28151 | -.07336 |
|       | Ctrl  | -1.93450  | .096535 | .052  | -3.89834 | .02934  |
|       | Dre   | -.37347   | .050394 | .180  | -.90797  | .16103  |
|       | FET   | -2.15687  | .112748 | .089  | -4.90245 | .58872  |
|       | G1    | .04703    | .044712 | 1.000 | -.55363  | .64770  |
|       | Gac   | -.10510   | .089703 | 1.000 | -1.76371 | 1.55351 |
|       | Gga   | -1.84847* | .074251 | .008  | -2.90279 | -.79415 |
|       | Rno   | -1.49070* | .082359 | .038  | -2.84464 | -.13676 |
|       | ST2   | .11833    | .049039 | 1.000 | -.41628  | .65295  |
|       | ST3A1 | -.09500   | .042669 | 1.000 | -.79659  | .60659  |
|       | ST3H6 | -.12593   | .057228 | 1.000 | -.73147  | .47961  |
|       | Tru   | -.48330   | .072741 | .415  | -1.48693 | .52033  |

|       |       |       |          |         |       |          |         |
|-------|-------|-------|----------|---------|-------|----------|---------|
|       | ST3H6 | A5    | .05930   | .050348 | 1.000 | -.63010  | .74870  |
|       |       | ASF   | .22987   | .043180 | .966  | -1.56757 | 2.02730 |
|       |       | B1    | -.55150  | .060574 | .081  | -1.17959 | .07659  |
|       |       | Ctrl  | -1.80857 | .098606 | .046  | -3.56056 | -.05657 |
|       |       | Dre   | -.24753  | .054256 | .715  | -.85917  | .36410  |
|       |       | FET   | -2.03093 | .114526 | .082  | -4.49904 | .43717  |
|       |       | G1    | .17297   | .049024 | .979  | -.57649  | .92242  |
|       |       | Gac   | .02083   | .091929 | 1.000 | -1.46069 | 1.50236 |
|       |       | Gga   | -1.72253 | .076925 | .007  | -2.69060 | -.75447 |
|       |       | Rno   | -1.36477 | .084777 | .035  | -2.58309 | -.14644 |
|       |       | ST2   | .24427   | .053000 | .729  | -.38103  | .86957  |
|       |       | ST3A1 | .03093   | .047168 | 1.000 | -.85876  | .92063  |
|       |       | ST3A2 | .12593   | .057228 | 1.000 | -.47961  | .73147  |
|       |       | Tru   | -.35737  | .075468 | .720  | -1.28420 | .56946  |
|       | Tru   | A5    | .41667   | .067462 | .705  | -.96287  | 1.79620 |
|       |       | ASF   | .58723   | .062295 | .674  | -2.11939 | 3.29386 |
|       |       | B1    | -.19413  | .075402 | .999  | -1.12231 | .73405  |
|       |       | Ctrl  | -1.45120 | .108348 | .036  | -2.76803 | -.13437 |
|       |       | Dre   | .10983   | .070426 | 1.000 | -1.00742 | 1.22709 |
|       |       | FET   | -1.67357 | .123014 | .060  | -3.44704 | .09990  |
|       |       | G1    | .53033   | .066479 | .522  | -.98413  | 2.04479 |
|       |       | Gac   | .37820   | .102309 | .918  | -.78589  | 1.54229 |
|       |       | Gga   | -1.36517 | .089071 | .011  | -2.28969 | -.44065 |
|       |       | Rno   | -1.00740 | .095934 | .054  | -2.03757 | .02277  |
|       |       | ST2   | .60163   | .069464 | .306  | -.58256  | 1.78583 |
|       |       | ST3A1 | .38830   | .065123 | .840  | -1.37576 | 2.15236 |
|       |       | ST3A2 | .48330   | .072741 | .415  | -.52033  | 1.48693 |
|       |       | ST3H6 | .35737   | .075468 | .720  | -.56946  | 1.28420 |
| RCA-I | A5    | ASF   | -.61620  | .085466 | .201  | -1.52969 | .29729  |
|       |       | B1    | .05757   | .074180 | 1.000 | -.72829  | .84343  |
|       |       | Ctrl  | .08533   | .062245 | 1.000 | -.98042  | 1.15108 |
|       |       | Dre   | -.11973  | .100160 | 1.000 | -1.38494 | 1.14547 |
|       |       | FET   | -.25147  | .067045 | .933  | -1.09650 | .59357  |
|       |       | G1    | -.02910  | .121842 | 1.000 | -2.05058 | 1.99238 |
|       |       | Gac   | -.13757  | .078188 | 1.000 | -.94851  | .67338  |
|       |       | Gga   | .10380   | .080815 | 1.000 | -.73699  | .94459  |
|       |       | Rno   | -.05687  | .074035 | 1.000 | -.84239  | .72865  |
|       |       | ST2   | -.56807  | .073609 | .159  | -1.35286 | .21672  |
|       |       | ST3A1 | -.02160  | .107392 | 1.000 | -1.51258 | 1.46938 |
|       |       | ST3A2 | -.16010  | .060565 | 1.000 | -1.38921 | 1.06901 |
|       |       | ST3H6 | -.11453  | .162259 | 1.000 | -3.97794 | 3.74887 |
|       |       | Tru   | -.18683  | .062283 | .998  | -1.24965 | .87598  |

|      |       |         |         |       |          |         |
|------|-------|---------|---------|-------|----------|---------|
| ASF  | A5    | .61620  | .085466 | .201  | -.29729  | 1.52969 |
|      | B1    | .67377  | .081273 | .152  | -.25740  | 1.60493 |
|      | Ctrl  | .70153  | .070549 | .292  | -.72560  | 2.12867 |
|      | Dre   | .49647  | .105521 | .676  | -.68919  | 1.68212 |
|      | FET   | .36473  | .074818 | .778  | -.73143  | 1.46089 |
|      | G1    | .58710  | .126286 | .806  | -1.19074 | 2.36494 |
|      | Gac   | .47863  | .084947 | .427  | -.43474  | 1.39201 |
|      | Gga   | .72000  | .087371 | .122  | -.19839  | 1.63839 |
|      | Rno   | .55933  | .081141 | .273  | -.37320  | 1.49187 |
|      | ST2   | .04813  | .080753 | 1.000 | -.88875  | .98502  |
|      | ST3A1 | .59460  | .112409 | .579  | -.76092  | 1.95012 |
|      | ST3A2 | .45610  | .069071 | .711  | -1.18013 | 2.09233 |
|      | ST3H6 | .50167  | .165622 | .999  | -2.87860 | 3.88194 |
|      | Tru   | .42937  | .070582 | .713  | -.99383  | 1.85256 |
| B1   | A5    | -.05757 | .074180 | 1.000 | -.84343  | .72829  |
|      | ASF   | -.67377 | .081273 | .152  | -1.60493 | .25740  |
|      | Ctrl  | .02777  | .056349 | 1.000 | -.81083  | .86636  |
|      | Dre   | -.17730 | .096607 | 1.000 | -1.56038 | 1.20578 |
|      | FET   | -.30903 | .061611 | .606  | -1.01115 | .39309  |
|      | G1    | -.08667 | .118939 | 1.000 | -2.35932 | 2.18599 |
|      | Gac   | -.19513 | .073581 | .998  | -.97110  | .58083  |
|      | Gga   | .04623  | .076367 | 1.000 | -.77913  | .87159  |
|      | Rno   | -.11443 | .069152 | 1.000 | -.83148  | .60261  |
|      | ST2   | -.62563 | .068696 | .081  | -1.33823 | .08697  |
|      | ST3A1 | -.07917 | .104086 | 1.000 | -1.73519 | 1.57686 |
|      | ST3A2 | -.21767 | .054488 | .959  | -1.17939 | .74406  |
|      | ST3H6 | -.17210 | .160090 | 1.000 | -4.44705 | 4.10285 |
|      | Tru   | -.24440 | .056391 | .883  | -1.08090 | .59210  |
| Ctrl | A5    | -.08533 | .062245 | 1.000 | -1.15108 | .98042  |
|      | ASF   | -.70153 | .070549 | .292  | -2.12867 | .72560  |
|      | B1    | -.02777 | .056349 | 1.000 | -.86636  | .81083  |
|      | Dre   | -.20507 | .087776 | 1.000 | -2.47362 | 2.06349 |
|      | FET   | -.33680 | .046558 | .240  | -.87573  | .20213  |
|      | G1    | -.11443 | .111885 | 1.000 | -3.63800 | 3.40914 |
|      | Gac   | -.22290 | .061530 | .981  | -1.25961 | .81381  |
|      | Gga   | .01847  | .064836 | 1.000 | -1.15554 | 1.19247 |
|      | Rno   | -.14220 | .056158 | 1.000 | -.97394  | .68954  |
|      | ST2   | -.65340 | .055596 | .097  | -1.46518 | .15838  |
|      | ST3A1 | -.10693 | .095946 | 1.000 | -2.79632 | 2.58245 |
|      | ST3A2 | -.24543 | .036616 | .255  | -.63726  | .14640  |
|      | ST3H6 | -.19987 | .154921 | 1.000 | -5.96045 | 5.56071 |
|      | Tru   | -.27217 | .039392 | .215  | -.68062  | .13629  |

|     |       |         |         |       |          |         |
|-----|-------|---------|---------|-------|----------|---------|
| Dre | A5    | .11973  | .100160 | 1.000 | -1.14547 | 1.38494 |
|     | ASF   | -.49647 | .105521 | .676  | -1.68212 | .68919  |
|     | B1    | .17730  | .096607 | 1.000 | -1.20578 | 1.56038 |
|     | Ctrl  | .20507  | .087776 | 1.000 | -2.06349 | 2.47362 |
|     | FET   | -.13173 | .091243 | 1.000 | -1.89097 | 1.62751 |
|     | G1    | .09063  | .136660 | 1.000 | -1.45829 | 1.63955 |
|     | Gac   | -.01783 | .099717 | 1.000 | -1.29416 | 1.25850 |
|     | Gga   | .22353  | .101791 | 1.000 | -1.00761 | 1.45467 |
|     | Rno   | .06287  | .096495 | 1.000 | -1.32514 | 1.45087 |
|     | ST2   | -.44833 | .096169 | .818  | -1.85129 | .95462  |
|     | ST3A1 | .09813  | .123949 | 1.000 | -1.20349 | 1.39975 |
|     | ST3A2 | -.04037 | .086593 | 1.000 | -2.57442 | 2.49369 |
|     | ST3H6 | .00520  | .173661 | 1.000 | -2.68817 | 2.69857 |
|     | Tru   | -.06710 | .087803 | 1.000 | -2.33034 | 2.19614 |
| FET | A5    | .25147  | .067045 | .933  | -.59357  | 1.09650 |
|     | ASF   | -.36473 | .074818 | .778  | -1.46089 | .73143  |
|     | B1    | .30903  | .061611 | .606  | -.39309  | 1.01115 |
|     | Ctrl  | .33680  | .046558 | .240  | -.20213  | .87573  |
|     | Dre   | .13173  | .091243 | 1.000 | -1.62751 | 1.89097 |
|     | G1    | .22237  | .114625 | 1.000 | -2.65996 | 3.10469 |
|     | Gac   | .11390  | .066382 | 1.000 | -.71212  | .93992  |
|     | Gga   | .35527  | .069457 | .674  | -.56231  | 1.27285 |
|     | Rno   | .19460  | .061436 | .981  | -.50344  | .89264  |
|     | ST2   | -.31660 | .060923 | .555  | -1.00287 | .36967  |
|     | ST3A1 | .22987  | .099128 | 1.000 | -1.89165 | 2.35139 |
|     | ST3A2 | .09137  | .044287 | 1.000 | -.49341  | .67615  |
|     | ST3H6 | .13693  | .156912 | 1.000 | -4.94554 | 5.21941 |
|     | Tru   | .06463  | .046609 | 1.000 | -.47372  | .60298  |
| G1  | A5    | .02910  | .121842 | 1.000 | -1.99238 | 2.05058 |
|     | ASF   | -.58710 | .126286 | .806  | -2.36494 | 1.19074 |
|     | B1    | .08667  | .118939 | 1.000 | -2.18599 | 2.35932 |
|     | Ctrl  | .11443  | .111885 | 1.000 | -3.40914 | 3.63800 |
|     | Dre   | -.09063 | .136660 | 1.000 | -1.63955 | 1.45829 |
|     | FET   | -.22237 | .114625 | 1.000 | -3.10469 | 2.65996 |
|     | Gac   | -.10847 | .121479 | 1.000 | -2.15653 | 1.93960 |
|     | Gga   | .13290  | .123186 | 1.000 | -1.80023 | 2.06603 |
|     | Rno   | -.02777 | .118848 | 1.000 | -2.30986 | 2.25433 |
|     | ST2   | -.53897 | .118584 | .921  | -2.84934 | 1.77141 |
|     | ST3A1 | .00750  | .142045 | 1.000 | -1.51921 | 1.53421 |
|     | ST3A2 | -.13100 | .110959 | 1.000 | -3.94205 | 3.68005 |
|     | ST3H6 | -.08543 | .187008 | 1.000 | -2.32765 | 2.15678 |
|     | Tru   | -.15773 | .111906 | 1.000 | -3.67527 | 3.35980 |

|     |       |         |         |       |          |         |
|-----|-------|---------|---------|-------|----------|---------|
| Gac | A5    | .13757  | .078188 | 1.000 | -.67338  | .94851  |
|     | ASF   | -.47863 | .084947 | .427  | -1.39201 | .43474  |
|     | B1    | .19513  | .073581 | .998  | -.58083  | .97110  |
|     | Ctrl  | .22290  | .061530 | .981  | -.81381  | 1.25961 |
|     | Dre   | .01783  | .099717 | 1.000 | -1.25850 | 1.29416 |
|     | FET   | -.11390 | .066382 | 1.000 | -.93992  | .71212  |
|     | G1    | .10847  | .121479 | 1.000 | -1.93960 | 2.15653 |
|     | Gga   | .24137  | .080266 | .986  | -.59556  | 1.07829 |
|     | Rno   | .08070  | .073434 | 1.000 | -.69478  | .85618  |
|     | ST2   | -.43050 | .073006 | .368  | -1.20481 | .34381  |
|     | ST3A1 | .11597  | .106979 | 1.000 | -1.39151 | 1.62344 |
|     | ST3A2 | -.02253 | .059830 | 1.000 | -1.21806 | 1.17299 |
|     | ST3H6 | .02303  | .161986 | 1.000 | -3.88719 | 3.93326 |
|     | Tru   | -.04927 | .061568 | 1.000 | -1.08314 | .98461  |
| Gga | A5    | -.10380 | .080815 | 1.000 | -.94459  | .73699  |
|     | ASF   | -.72000 | .087371 | .122  | -1.63839 | .19839  |
|     | B1    | -.04623 | .076367 | 1.000 | -.87159  | .77913  |
|     | Ctrl  | -.01847 | .064836 | 1.000 | -1.19247 | 1.15554 |
|     | Dre   | -.22353 | .101791 | 1.000 | -1.45467 | 1.00761 |
|     | FET   | -.35527 | .069457 | .674  | -1.27285 | .56231  |
|     | G1    | -.13290 | .123186 | 1.000 | -2.06603 | 1.80023 |
|     | Gac   | -.24137 | .080266 | .986  | -1.07829 | .59556  |
|     | Rno   | -.16067 | .076226 | 1.000 | -.98622  | .66489  |
|     | ST2   | -.67187 | .075813 | .105  | -1.49828 | .15455  |
|     | ST3A1 | -.12540 | .108914 | 1.000 | -1.56361 | 1.31281 |
|     | ST3A2 | -.26390 | .063225 | .967  | -1.61696 | 1.08916 |
|     | ST3H6 | -.21833 | .163271 | 1.000 | -3.91910 | 3.48243 |
|     | Tru   | -.29063 | .064872 | .912  | -1.46137 | .88010  |
| Rno | A5    | .05687  | .074035 | 1.000 | -.72865  | .84239  |
|     | ASF   | -.55933 | .081141 | .273  | -1.49187 | .37320  |
|     | B1    | .11443  | .069152 | 1.000 | -.60261  | .83148  |
|     | Ctrl  | .14220  | .056158 | 1.000 | -.68954  | .97394  |
|     | Dre   | -.06287 | .096495 | 1.000 | -1.45087 | 1.32514 |
|     | FET   | -.19460 | .061436 | .981  | -.89264  | .50344  |
|     | G1    | .02777  | .118848 | 1.000 | -2.25433 | 2.30986 |
|     | Gac   | -.08070 | .073434 | 1.000 | -.85618  | .69478  |
|     | Gga   | .16067  | .076226 | 1.000 | -.66489  | .98622  |
|     | ST2   | -.51120 | .068539 | .166  | -1.22204 | .19964  |
|     | ST3A1 | .03527  | .103983 | 1.000 | -1.62732 | 1.69786 |
|     | ST3A2 | -.10323 | .054290 | 1.000 | -1.05670 | .85023  |
|     | ST3H6 | -.05767 | .160023 | 1.000 | -4.34693 | 4.23159 |
|     | Tru   | -.12997 | .056200 | 1.000 | -.95964  | .69970  |

|       |       |         |         |       |          |         |
|-------|-------|---------|---------|-------|----------|---------|
| ST2   | A5    | .56807  | .073609 | .159  | -.21672  | 1.35286 |
|       | ASF   | -.04813 | .080753 | 1.000 | -.98502  | .88875  |
|       | B1    | .62563  | .068696 | .081  | -.08697  | 1.33823 |
|       | Ctrl  | .65340  | .055596 | .097  | -.15838  | 1.46518 |
|       | Dre   | .44833  | .096169 | .818  | -.95462  | 1.85129 |
|       | FET   | .31660  | .060923 | .555  | -.36967  | 1.00287 |
|       | G1    | .53897  | .118584 | .921  | -1.77141 | 2.84934 |
|       | Gac   | .43050  | .073006 | .368  | -.34381  | 1.20481 |
|       | Gga   | .67187  | .075813 | .105  | -.15455  | 1.49828 |
|       | Rno   | .51120  | .068539 | .166  | -.19964  | 1.22204 |
|       | ST3A1 | .54647  | .103680 | .749  | -1.13592 | 2.22885 |
|       | ST3A2 | .40797  | .053709 | .420  | -.52139  | 1.33732 |
|       | ST3H6 | .45353  | .159827 | 1.000 | -3.87815 | 4.78522 |
|       | Tru   | .38123  | .055638 | .417  | -.42856  | 1.19103 |
| ST3A1 | A5    | .02160  | .107392 | 1.000 | -1.46938 | 1.51258 |
|       | ASF   | -.59460 | .112409 | .579  | -1.95012 | .76092  |
|       | B1    | .07917  | .104086 | 1.000 | -1.57686 | 1.73519 |
|       | Ctrl  | .10693  | .095946 | 1.000 | -2.58245 | 2.79632 |
|       | Dre   | -.09813 | .123949 | 1.000 | -1.39975 | 1.20349 |
|       | FET   | -.22987 | .099128 | 1.000 | -2.35139 | 1.89165 |
|       | G1    | -.00750 | .142045 | 1.000 | -1.53421 | 1.51921 |
|       | Gac   | -.11597 | .106979 | 1.000 | -1.62344 | 1.39151 |
|       | Gga   | .12540  | .108914 | 1.000 | -1.31281 | 1.56361 |
|       | Rno   | -.03527 | .103983 | 1.000 | -1.69786 | 1.62732 |
|       | ST2   | -.54647 | .103680 | .749  | -2.22885 | 1.13592 |
|       | ST3A2 | -.13850 | .094865 | 1.000 | -3.10625 | 2.82925 |
|       | ST3H6 | -.09293 | .177931 | 1.000 | -2.57959 | 2.39372 |
|       | Tru   | -.16523 | .095971 | 1.000 | -2.84894 | 2.51847 |
| ST3A2 | A5    | .16010  | .060565 | 1.000 | -1.06901 | 1.38921 |
|       | ASF   | -.45610 | .069071 | .711  | -2.09233 | 1.18013 |
|       | B1    | .21767  | .054488 | .959  | -.74406  | 1.17939 |
|       | Ctrl  | .24543  | .036616 | .255  | -.14640  | .63726  |
|       | Dre   | .04037  | .086593 | 1.000 | -2.49369 | 2.57442 |
|       | FET   | -.09137 | .044287 | 1.000 | -.67615  | .49341  |
|       | G1    | .13100  | .110959 | 1.000 | -3.68005 | 3.94205 |
|       | Gac   | .02253  | .059830 | 1.000 | -1.17299 | 1.21806 |
|       | Gga   | .26390  | .063225 | .967  | -1.08916 | 1.61696 |
|       | Rno   | .10323  | .054290 | 1.000 | -.85023  | 1.05670 |
|       | ST2   | -.40797 | .053709 | .420  | -1.33732 | .52139  |
|       | ST3A1 | .13850  | .094865 | 1.000 | -2.82925 | 3.10625 |
|       | ST3H6 | .04557  | .154254 | 1.000 | -5.98140 | 6.07253 |
|       | Tru   | -.02673 | .036680 | 1.000 | -.41973  | .36627  |

|       |       |         |         |       |          |         |
|-------|-------|---------|---------|-------|----------|---------|
| ST3H6 | A5    | .11453  | .162259 | 1.000 | -3.74887 | 3.97794 |
|       | ASF   | -.50167 | .165622 | .999  | -3.88194 | 2.87860 |
|       | B1    | .17210  | .160090 | 1.000 | -4.10285 | 4.44705 |
|       | Ctrl  | .19987  | .154921 | 1.000 | -5.56071 | 5.96045 |
|       | Dre   | -.00520 | .173661 | 1.000 | -2.69857 | 2.68817 |
|       | FET   | -.13693 | .156912 | 1.000 | -5.21941 | 4.94554 |
|       | G1    | .08543  | .187008 | 1.000 | -2.15678 | 2.32765 |
|       | Gac   | -.02303 | .161986 | 1.000 | -3.93326 | 3.88719 |
|       | Gga   | .21833  | .163271 | 1.000 | -3.48243 | 3.91910 |
|       | Rno   | .05767  | .160023 | 1.000 | -4.23159 | 4.34693 |
|       | ST2   | -.45353 | .159827 | 1.000 | -4.78522 | 3.87815 |
|       | ST3A1 | .09293  | .177931 | 1.000 | -2.39372 | 2.57959 |
|       | ST3A2 | -.04557 | .154254 | 1.000 | -6.07253 | 5.98140 |
|       | Tru   | -.07230 | .154937 | 1.000 | -5.82708 | 5.68248 |
| Tru   | A5    | .18683  | .062283 | .998  | -.87598  | 1.24965 |
|       | ASF   | -.42937 | .070582 | .713  | -1.85256 | .99383  |
|       | B1    | .24440  | .056391 | .883  | -.59210  | 1.08090 |
|       | Ctrl  | .27217  | .039392 | .215  | -.13629  | .68062  |
|       | Dre   | .06710  | .087803 | 1.000 | -2.19614 | 2.33034 |
|       | FET   | -.06463 | .046609 | 1.000 | -.60298  | .47372  |
|       | G1    | .15773  | .111906 | 1.000 | -3.35980 | 3.67527 |
|       | Gac   | .04927  | .061568 | 1.000 | -.98461  | 1.08314 |
|       | Gga   | .29063  | .064872 | .912  | -.88010  | 1.46137 |
|       | Rno   | .12997  | .056200 | 1.000 | -.69970  | .95964  |
|       | ST2   | -.38123 | .055638 | .417  | -1.19103 | .42856  |
|       | ST3A1 | .16523  | .095971 | 1.000 | -2.51847 | 2.84894 |
|       | ST3A2 | .02673  | .036680 | 1.000 | -.36627  | .41973  |
|       | ST3H6 | .07230  | .154937 | 1.000 | -5.68248 | 5.82708 |

Based on observed means.

The error term is Mean Square(Error) = .015.

\*. The mean difference is significant at the .05 level.
