# Supplementary material for: Engineering of CHO cells for the production of vertebrate recombinant sialyltransferases
Source: PeerJ journal article supplement (doi:10.7717/peerj.5788), 2019-02-11
Supplement: Figure_S2.pdf [file Figure_S2.pdf]

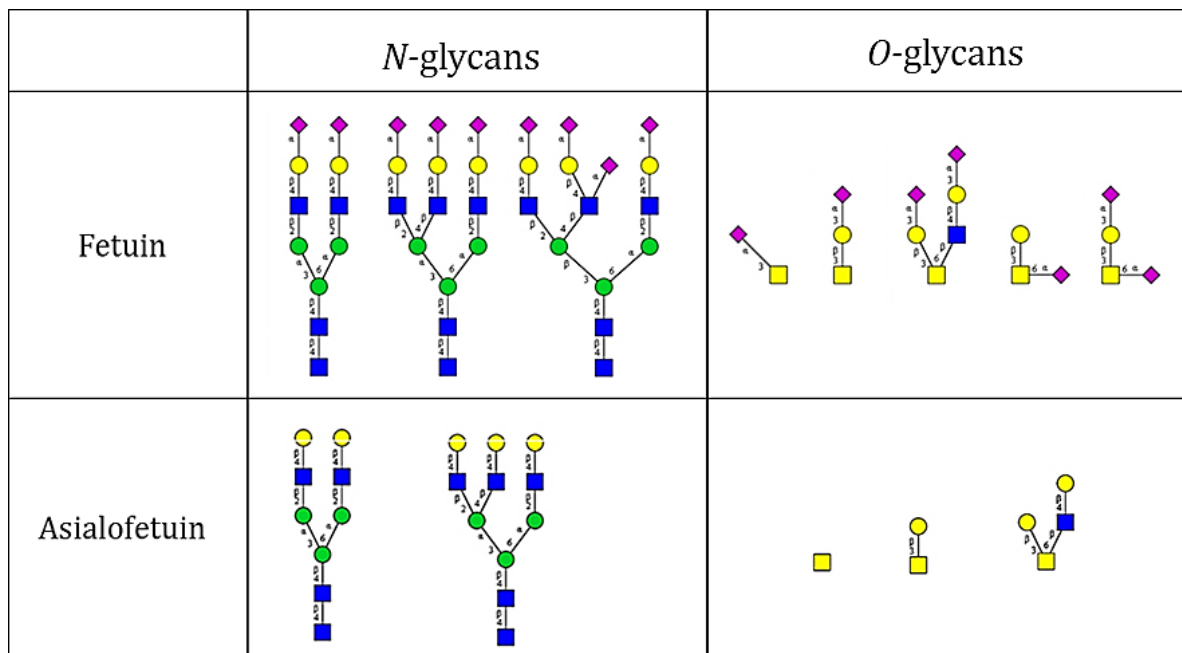

**Figure S2: *O*- and *N*-glycosylation of fetuin and asialofetuin**

The choice of acceptor in any particular assay was determined by the assay format. For the routine sialyltransferase activity, the indirect phosphate linked assay, suitable acceptors were asialofetuin (ASF), LacNAc or Lac but as production of sialyllactose was the focus of our study, Lac or LacNAc were preferred over ASF. However, for lectin-binding assays, larger acceptor glycoprotein structures were more effective. Fetuin in its asialyated form, asialofetuin (ASF) is a commercially available glycoprotein which has *N*- and *O*-glycan chains offering eight possible terminal Gal sites. The schematic uses IUPAC glycan colour codes.
