# Supplementary material for: Engineering of CHO cells for the production of vertebrate recombinant sialyltransferases
Source: PeerJ. 2019 Feb 11;7:e5788. doi: 10.7717/peerj.5788 (PMC6375257; doi:10.7717/peerj.5788)
Supplement: Supplemental Information 9 — Proteins purified on Ni Sepharose excel (150 ng) were assayed using LacNAc (2.4 mM) as acceptor and CMP-Neu5Ac (0.2 mM) as donor. Reactions were incubated for 30 min at 37 ° C. Transfer of Neu5Ac was measured by release of phosphate using a phosphate linked assay with Malachite Green detection. These are the averages of three separate experiments. Human ST6Gal II is shown with lighter shading and the negative control (Neg) (IMAC-purified PSA) has no shading. Mouse ST6Gal I (mST6) is a commercial preparation used as a positive control. See Table 1 for explanation of all clone names. Significant activities following Student t-tests between PSA control and SIAT clones are marked with an asterisk (p< 0.01). [file peerj-07-5788-s009.xlsx]

## Sheet: DATA_1
2017-05-26
A	Standard Curve for Pi
uM Pi			mean	sd
0	0.00445	-0.00445	0	0.00629325
0.78125	0.01495	0.01645	0.0157	0.00106066
1.5625	0.02625	0.02425	0.02525	0.00141421
3.125	0.04315	0.03725	0.0402	0.00417193
6.25	0.07155	0.05815	0.06485	0.00947523
12.5	0.11185	0.11445	0.11315	0.00183848
25	0.19315	0.20595	0.19955	0.00905097
50	0.38235	0.37295	0.37765	0.0066468
100	0.66185	0.65575	0.6588	0.00431335
B	Assay 1
					mean	sd	uM Pi
A5 (h)	A	A5	0.78795	0.68025	0.7341	0.0761554	108.106
B1 (h)	B	B1	0.35115	0.39585	0.3735	0.0316077	53.4697
G1 (h)	D	G1	1.16765	0.82395	0.9958	0.243033	147.758
Dre	F	Dre	1.14655	1.12415	1.13535	0.0158392	168.902
Gac	G	Gac	1.14635	0.87545	1.0109	0.191555	150.045
Tru	H	Tru	1.38855	1.08145	1.235	0.217152	184
Gga	I	Gga	0.71125	0.48975	0.6005	0.156624	87.8636
Rno	J	Rno	0.02445	0.73385	0.73385	0.501622	108.068
C (m)	K	Mus	1.25825	0.92265	1.09045	0.237305	162.098
Neg	N	PSA	0.24605	0.20125	0.22365	0.0316784	30.7652
ST6Gal2	T	ST2	0.27325	0.25115	0.2622	0.0156271	36.6061
A1 (h)	U	A1	0.21495	0.20375	0.20935	0.0079196	28.5985
A2 (h)	V	A2	0.27325	0.25115	0.2622	0.0156271	36.6061
H6 (z)	W	H6	1.31705	1.26325	1.29015	0.0380423	192.356

## Sheet: DATA_2
2017-06-19
A	Standard Curve for Pi
uM Pi			mean	sd
0	0.01045	0.00015	0.0053	0.0072832
1.5625	0.01135	0.00675	0.00905	0.00325269
3.125	0.03275	0.02485	0.0288	0.00558614
6.25	0.05805	0.05365	0.05585	0.00311127
12.5	0.11125	0.10215	0.1067	0.00643467
25	0.21315	0.20605	0.2096	0.00502046
50	0.46115	0.47395	0.46755	0.00905097
100	0.86385	0.81005	0.83695	0.0380423
B	Assay 2
					mean	sd
A5 (h)	A	A5	0.68075	0.69225	0.6865	0.00813173
B1 (h)	B	B1	0.29135	0.24335	0.26735	0.0339411
G1 (h)	D	G1	0.76185	0.75235	0.7571	0.00671751
Dre	F	Dre	0.76815	0.73855	0.75335	0.0209304
Gac	G	Gac	0.97685	0.93695	0.9569	0.0282136
Tru	H	Tru	0.99995	1.01085	1.0054	0.00770746
Gga	I	Gga	0.66905	0.58435	0.6267	0.0598919
Rno	J	Rno	1.03075	1.02705	1.0289	0.0026163
C (m)	K	Mus	0.81795	0.76885	0.7934	0.0347189
Neg	N	PSA	0.20155	0.21895	0.21025	0.0123037
ST6Gal2	T	ST6Gal2	0.26565	0.23105	0.24835	0.0244659
A1 (h)	U	ST3A1	0.20825	0.30455	0.2564	0.0680944
A2 (h)	V	ST3A2	0.23355	0.25525	0.2444	0.0153442
H6 (z)	W	ST3H6	0.80895	0.90815	0.85855	0.070145

## Sheet: DATA_3
2017-06-21
A	Standard Curve for Pi
uM Pi			mean	sd
100	0.90965	0.91835	0.914	0.00615183
50	0.54605	0.54285	0.54445	0.00226274
25	0.31695	0.33345	0.3252	0.0116673
12.5	0.19955	0.21395	0.20675	0.0101823
6.25	0.13845	0.14735	0.1429	0.00629325
3.125	0.09615	0.08105	0.0886	0.0106773
1.5625	0.07855	0.09735	0.08795	0.0132936
0	-0.00035	0.00035	0	0.000494975
B	Assay 3
					mean	sd	uM Pi
A5 (h)	A	A5	0.76865	0.66225	0.71545	0.0752362	105.28
B1 (h)	B	B1	0.35085	0.26135	0.3061	0.0632861	43.2576
G1 (h)	D	G1	1.05075	0.94665	0.9987	0.0736098	148.197
Dre	F	Dre	1.09685	1.00205	1.04945	0.0670337	155.886
Gac	G	Gac	1.06405	0.93685	1.00045	0.089944	148.462
Tru	H	Tru	1.12095	1.03745	1.0792	0.0590434	160.394
Gga	I	Gga	0.67515	0.64245	0.6588	0.0231224	96.697
Rno	J	Rno	0.93705	0.85335	0.8952	0.0591848	132.515
C (m)	K	Mus	0.84435	0.73345	0.73345	0.0784181	108.008
Neg	N	PSA	0.32775	0.27905	0.3034	0.0344361	42.8485
A1 (h)	U	A1	0.35565	0.31545	0.33555	0.0284257	47.7197
A2 (h)	V	A2	0.28655	0.24725	0.2669	0.0277893	37.3182
H6 (z)	W	H6	0.77675	0.68305	0.7299	0.0662559	107.47
ST6Gal2	T	ST2	0.32625	0.31605	0.32115	0.00721249	45.5379

## Sheet: Conversion factors
Conversion factor = pmol Pi/OD												2017-05-26	OD620			2017-06-19				2017-06-21
													mean	pmol/well			mean	pmol/well			mean	pmol/well
2017-05-26												A5	0.6865	2557.76		A5	0.6865	2014.12		A5	0.71545	2020.22
0	0											catB1	0.26735	996.093		catB1	0.26735	784.378		B1	0.3061	864.335
0.0157	39.0625											G1	0.7571	2820.8		G1	0.7571	2221.26		G1	0.9987	2820.03
0.02525	78.125											Dre	0.75335	2806.83		Dre	0.75335	2210.25		Dre	1.04945	2963.33
0.0402	156.25											Gac	0.9569	3565.22		Gac	0.9569	2807.45		Gac	1.00045	2824.97
0.11315	312.5											Tru	1.0054	3745.92		Tru	1.0054	2949.74		Tru	1.0792	3047.34
0.19955	625											Gga	0.6267	2334.96		Gga	0.6267	1838.68		Gga	0.6588	1860.25
0.37765	1250											Rno	1.0289	3833.48		Rno	1.0289	3018.69		Rno	0.8952	2527.78
0.6588	2500											Mus	0.7934	2956.05		Mus	0.7934	2327.76		Mus	0.73345	2071.04
												PSA	0.21025	783.349		PSA	0.21025	616.852		PSA	0.3034	856.711
CF=3725.8												ST6Gal2	0.24835	925.302		ST6Gal2	0.24835	728.634		A1	0.33555	947.493
												ST3A1	0.2564	955.295		ST3A1	0.2564	752.252		A2	0.2669	753.646
												ST3A2	0.2444	910.586		ST3A2	0.2444	717.045		H6	0.7299	2061.02
												ST3H6	0.85855	3198.79		ST3H6	0.85855	2518.9		ST2	0.32115	906.831
																				B2	0.3304	932.95
2017-06-19
Abs 620	pmol/well Pi
0	0																mean	sd
0.00905	39.0625											A5	A	2557.76	2014.12	2020.22	2197.37	312.126
0.0288	78.125											catB1	C	996.093	784.378	864.335	881.602	106.908
0.05585	156.25											G1	D	2820.8	2221.26	2820.03	2620.7	345.926
0.1067	312.5											Dre	F	2806.83	2210.25	2963.33	2660.14	397.392
0.2096	625											Gac	G	3565.22	2807.45	2824.97	3065.88	432.529
0.46755	1250											Tru	H	3745.92	2949.74	3047.34	3247.67	434.25
0.83695	2500											Gga	I	2334.96	1838.68	1860.25	2011.3	280.508
												Rno	J	3833.48	3018.69	2527.78	3126.65	659.51
CF=2933.9												Mus	K	2956.05	2327.76	2071.04	2451.62	455.319
												PSA	M	783.349	616.852	856.711	752.304	122.906
												ST6Gal2	T	925.302	728.634	906.831	853.589	108.608
												ST3A1	U	955.295	752.252	947.493	885.013	115.041
												ST3A2	V	910.586	717.045	753.646	793.759	102.817
												ST3H6	W	3198.79	2518.9	2061.02	2592.9	572.482
2017-06-21
Abs 620	pmol/well Pi
0.914	2500
0.54445	1250
0.3252	625
0.20675	312.5
0.1429	156.25
0.0886	78.125
0.08795	39.0625
0	0
CF=2823.7

## Sheet: Summary Fig
2017-06-19		pmol/well			mean	sd			pmol/min		pmol/min/ug			Specific activities			sd
		Assay 1	Assay 2	Assay 3					mean	sd	mean	sd
hST6 A5	A	2557.76	2014.12	2020.22	2197.37	312.126		A	73.2456	10.4042	488.304	69.3613		hST6 A5	A	488.304	69.3613
hST6 B1	B	3044.54	2397.44	1878.18	2440.05	584.343		B	81.3351	19.4781	542.234	129.854		hST6 B1	B	542.234	129.854
hST6	D	2820.8	2221.26	2820.03	2620.7	345.926		D	87.3565	11.5309	582.377	76.8724		hST6	D	582.377	76.8724
zST6	F	2806.83	2210.25	2963.33	2660.14	397.392		F	88.6713	13.2464	591.142	88.3094		zST6	F	591.142	88.3094
sST6	G	3565.22	2807.45	2824.97	3065.88	432.529		G	102.196	14.4176	681.306	96.1175		sST6	G	681.306	96.1175
fST6	H	3745.92	2949.74	3047.34	3247.67	434.25		H	108.256	14.475	721.704	96.5		fST6	H	721.704	96.5
cST6	I	2334.96	1838.68	1860.25	2011.3	280.508		I	67.0432	9.35027	446.955	62.3351		cST6	I	446.955	62.3351
rST6	J	3833.48	3018.69	2527.78	3126.65	659.51		J	104.222	21.9837	694.81	146.558		rST6	J	694.81	146.558
mST6	K	2956.05	2327.76	2071.04	2451.62	455.319		K	81.7205	15.1773	544.804	101.182		mST6	K	544.804	101.182
hST6Gal2	T	925.302	728.634	906.831	853.589	108.608		T	28.453	3.62026	189.686	24.1351		hST6Gal2	T	189.686	24.1351
hST3 A1	U	955.295	752.252	947.493	885.013	115.041		U	29.5004	3.83469	196.67	25.5646		hST3 A1	U	196.67	25.5646
hST3 A2	V	910.586	717.045	753.646	793.759	102.817		V	26.4586	3.42722	176.391	22.8482		hST3 A2	V	176.391	22.8482
zST3	W	3198.79	2518.9	2061.02	2592.9	572.482		W	86.43	19.0827	576.2	127.218		zST3	W	576.2	127.218
Neg	N	65.5741	51.6366	480	199.07	243.392		N	6.63567	8.11307	44.2378	54.0871		Neg	N	44.2378	54.0871

## Sheet: NOTE
				pmol/well	mean	sd			pmol/min		pmol/min/ug			Specific activities
A5	A	2557.76	2014.12	2020.22	2197.37	312.126	A5	A	67.3405	10.4042	448.937	69.3613		A5	A	448.937	69.3613
CHOB1	B	3044.54	2397.44	1878.18	2440.05	584.343	CHOB1	B	62.6061	19.4781	417.374	129.854		CHOB1	B	417.374	129.854
catB1	C	996.093	784.378	864.335	881.602	106.908	catB1	C	28.8112	3.56361	192.074	23.7574		catB1	C	192.074	23.7574
G1	D	2820.8	2221.26	2820.03	2620.7	345.926	G1	D	94.001	11.5309	626.673	76.8724		G1	D	626.673	76.8724
Cmi	E	3682.02	2899.43	3226.36	3269.27	393.058	Cmi	E	107.545	13.1019	716.969	87.3463		Cmi	E	716.969	87.3463
Dre	F	2806.83	2210.25	2963.33	2660.14	397.392	Dre	F	98.7777	13.2464	658.518	88.3094		Dre	F	658.518	88.3094
Gac	G	3565.22	2807.45	2824.97	3065.88	432.529	Gac	G	94.1657	14.4176	627.771	96.1175		Gac	G	627.771	96.1175
Tru	H	3745.92	2949.74	3047.34	3247.67	434.25	Tru	H	101.578	14.475	677.186	96.5		Tru	H	677.186	96.5
Gga	I	2334.96	1838.68	1860.25	2011.3	280.508	Gga	I	62.0085	9.35027	413.39	62.3351		Gga	I	413.39	62.3351
Rno	J	3833.48	3018.69	2527.78	3126.65	659.51	Rno	J	84.2592	21.9837	561.728	146.558		Rno	J	561.728	146.558
Mus	K	2956.05	2327.76	2071.04	2451.62	455.319	Mus	K	69.0348	15.1773	460.232	101.182		Mus	K	460.232	101.182
Calbio	L	901.457	709.857	1006.79	872.702	150.541	Calbio	L	33.5597	5.01802	223.731	33.4535		Calbio	L	223.731	33.4535
PSA	M	783.349	616.852	856.711	752.304	122.906	PSA	M	28.557	4.09686	190.38	27.3124		PSA	M	190.38	27.3124
NoST	N	65.5741	51.6366	480	199.07	243.392	NoST	N	16	8.11307	106.667	54.0871		NoST	N	106.667	54.0871
CHOB2F2	S	966.286	760.907	932.95	886.714	110.22	CHOB2F2	S	31.0983	3.674	207.322	24.4933		CHOB2F2	S	207.322	24.4933
ST6Gal2	T	925.302	728.634	906.831	853.589	108.608	ST6Gal2	T	30.2277	3.62026	201.518	24.1351		ST6Gal2	T	201.518	24.1351
ST3A1	U	955.295	752.252	947.493	885.013	115.041	ST3A1	U	31.5831	3.83469	210.554	25.5646		ST3A1	U	210.554	25.5646
ST3A2	V	910.586	717.045	753.646	793.759	102.817	ST3A2	V	25.1215	3.42722	167.477	22.8482		ST3A2	V	167.477	22.8482
ST3H6	W	3198.79	2518.9	2061.02	2592.9	572.482	ST3H6	W	68.7006	19.0827	458.004	127.218		ST3H6	W	458.004	127.218
